# Supplementary material
Source: publisher figshare collection journal article supplement (https://acs.figshare.com/ndownloader/files/4340677)
Supplement: Supplementary file 1 [file 4340677]

data_(3)

_publ_contact_author_name 'Karen I. Goldberg'
_publ_contact_author_address
;
Department of Chemistry, BOX 351700
University of Washington
Seattle, WA 98195
USA
;
_publ_contact_author_email 'goldberg@chem.washington.edu'
_publ_requested_journal 'Organometallics'
_publ_section_title
'Synth. and Characterization of Pd Complexes with Hemilabile PCO Pincer Ligand'


loop_
_publ_author_name
_publ_author_address
'Gregory R. Fulmer'
;
Department of Chemistry
University of Washington 
Seattle, WA 98195 USA
;
'Werner Kaminsky'
;
Department of Chemistry
University of Washington 
Seattle, WA 98195 USA
;
'Richard A. Kemp'
;
Department of Chemistry
University of New Mexico
Albuquerque, New Mexico 87131 USA
and 
Advanced Materials Laboratory
Sandia National Laboratory, 
Albuquerque, New Mexico 87106 USA
;
'Karen I. Goldberg'
;
Department of Chemistry
University of Washington 
Seattle, WA 98195 USA
;

_publ_section_abstract 
;
The synthesis of a new pincer ligand (tBuPCO = 2-(CH2PtBu2)-6-(CH2OCH3)C6H3) 
is reported. This ligand has been observed to coordinate in three different 
modes to palladium. The tBuPCO ligand coordinates in a monodentate fashion 
through the phosphine moiety in the dimeric [(tBuPCO)u-Pd(Cl)(u-Cl)]2. 
Bidentate coordination is observed through the phosphine and the aryl ring 
in the binuclear [(tBuPCO)u-Pd(u-OH)]2. The traditional tridentate coordination 
mode of a pincer is observed in the monomeric complex (tBuPCO)PdCl wherein 
the ether oxygen provides the third point of attachment. Each of these novel 
palladium(II) complexes was characterized by NMR spectroscopy, elemental 
analyses, and single crystal X-ray crystallography. A variety of other 
palladium(II) complexes of tBuPCO have also been prepared and characterized, 
including the hydroxide complex (tBuPCO)PdOH. The reactivity of the hydroxide 
complex with CO2, CO, and H2 is reported.
;
_publ_section_comment
;
Details and comments here
;

_publ_section_exptl_prep
;
details of preparation here 
;

_publ_section_exptl_refinement
;
 All H atoms were initially located in a difference Fourier map and were 
 refined with a riding  model. H atoms were placed in geometrically 
 idealised positions and constrained to ride on their parent atoms with 
 C---H distances in the range 0.95-1.00 \%A. U~iso~ values were fixed 
 such that they were 1.2U~eq~ of their parent atom U~eq~ for CH's and 
 1.5U~eq~ of their parent atom U~eq~ in case of methyl groups.
;

_publ_section_references
;
Altomare, A., Burla, M.C., Camalli, M., Cascarano, G.L.,
Giacovazzo, C., Guagliardi, A., Moliterni, A.G.G & Spagna, R.
(1999). J. Appl. Cryst. 32, 115-119.

Beurskens, P.T., Admiraal, G., Beurskens, G., Bosman, W. P., 
Garcia-Granada, S., Gould, R. O., Smits, J. M. M. & Smykalla, C. 
(1996) The DIRDIF96 Program System. Technical Report of the 
Crystallography Laboratory, University of Nijmegen, The Netherlands.

MacKay, S.; Gilmore, C.J.; Edwards, C.; Tremayne, M.; Stewart, N.; 
Shankland, K. (1998) maXus: a computer program for the solution and
refinement of crystal structures from diffraction data" University of 
Glasgow, Scotland, UK, Nonius BV, Delft, The Netherlands and 
MacScience Co. Ltd., Yokohama, Japan.

Johnson, C. K. (1976). ORTEP-II. A Fortran Thermal-Ellipsoid Plot
Program. Report ORNL-5138. Oak Ridge National Laboratory, Oak Ridge,
Tennessee, USA.

Otwinowski, Z. and Minor, W, (1997). In Methods in Enzymology, 276,
edited by C.W. Carter, Jr. & R.M. Sweet pp. 307-326,
New York:Academic Press.

LePage, Y. (1987). J. Appl. Cryst. 20, 264-269.

Sheldrick, G. M. (1997).  SHELXL97.  Program for the Refinement of Crystal
Structures.  University of G\"ottingen, Germany.
;

_audit_creation_method            SHELXL-97
_chemical_name_systematic 
; 
'(3)'
;   
_chemical_name_common             '[(tBuPCO)u-PdCl(u-Cl)]2' 
_chemical_melting_point           ? 
_chemical_formula_moiety          'C34 H58 Cl4 O2 P2 Pd2, 2(C7 H8)'
_chemical_formula_sum 
 'C48 H74 Cl4 O2 P2 Pd2' 
_chemical_formula_weight          1099.61 
 
loop_ 
 _atom_type_symbol 
 _atom_type_description 
 _atom_type_scat_dispersion_real 
 _atom_type_scat_dispersion_imag 
 _atom_type_scat_source 
 'C'  'C'   0.0033   0.0016 
 'International Tables Vol C Tables 4.2.6.8 and 6.1.1.4' 
 'H'  'H'   0.0000   0.0000 
 'International Tables Vol C Tables 4.2.6.8 and 6.1.1.4' 
 'O'  'O'   0.0106   0.0060 
 'International Tables Vol C Tables 4.2.6.8 and 6.1.1.4' 
 'Cl'  'Cl'   0.1484   0.1585 
 'International Tables Vol C Tables 4.2.6.8 and 6.1.1.4' 
 'P'  'P'   0.1023   0.0942 
 'International Tables Vol C Tables 4.2.6.8 and 6.1.1.4' 
 'Pd'  'Pd'  -0.9988   1.0072 
 'International Tables Vol C Tables 4.2.6.8 and 6.1.1.4' 
 
_symmetry_space_group_name_H-M 'P 21/c'
_symmetry_cell_setting 'Monoclinic' 
_symmetry_space_group_name_Hall	'-P 2ybc'
_symmetry_Int_Tables_number        14
 
loop_ 
 _symmetry_equiv_pos_as_xyz 
 'x, y, z' 
 '-x, y+1/2, -z+1/2' 
 '-x, -y, -z' 
 'x, -y-1/2, z-1/2' 
 
_cell_length_a                    8.3425(2) 
_cell_length_b                    18.9197(5) 
_cell_length_c                    15.7363(5) 
_cell_angle_alpha                 90.00 
_cell_angle_beta                  94.9595(9) 
_cell_angle_gamma                 90.00 
_cell_volume                      2474.48(12) 
_cell_formula_units_Z             2 
_cell_measurement_temperature     130(2) 
_cell_measurement_reflns_used     580 
_cell_measurement_theta_min       3 
_cell_measurement_theta_max       20
 
_exptl_crystal_description        prism 
_exptl_crystal_colour             'yellow-brown' 
_exptl_crystal_size_max           0.30 
_exptl_crystal_size_mid           0.26 
_exptl_crystal_size_min           0.24 
_exptl_crystal_density_meas       ? 
_exptl_crystal_density_diffrn     1.476 
_exptl_crystal_density_method     'not measured' 
_exptl_crystal_F_000              1136 
_exptl_absorpt_coefficient_mu     1.044 
_exptl_absorpt_correction_type    'multi-scan'  
_exptl_absorpt_correction_T_min   0.7448 
_exptl_absorpt_correction_T_max   0.7877 
_exptl_absorpt_process_details    'HKL2008' 
 
_exptl_special_details 
; 
 Data was collected with \w and \f scans in 
 1.7^o^ increments  with 40 second  exposures
 per degree.  Crystal-to-detector distance was 30 mm.
 38199 full and partial reflection were integrated. 
; 
 
_diffrn_ambient_temperature       130(2) 
_diffrn_radiation_wavelength      0.71073 
_diffrn_radiation_type            MoK\a 
_diffrn_radiation_source          'fine-focus sealed tube' 
_diffrn_radiation_monochromator   graphite 
_diffrn_measurement_device_type   'Nonius KappaCCD' 
_diffrn_measurement_method        '\f and \w scans' 
_diffrn_reflns_number             11029 
_diffrn_reflns_av_R_equivalents   0.0401 
_diffrn_reflns_av_sigmaI/netI     0.0606 
_diffrn_reflns_limit_h_min        -11 
_diffrn_reflns_limit_h_max        11 
_diffrn_reflns_limit_k_min        -23 
_diffrn_reflns_limit_k_max        25 
_diffrn_reflns_limit_l_min        -20 
_diffrn_reflns_limit_l_max        20 
_diffrn_reflns_theta_min          2.15 
_diffrn_reflns_theta_max          28.32 
_reflns_number_total              6009 
_reflns_number_gt                 4483 
_reflns_threshold_expression      >2sigma(I) 
 
_computing_data_collection        'KappaCCD' 
_computing_cell_refinement        'HKL Scalepack (Otwinowski & Minor 1997)'    
_computing_data_reduction         'HKL Scalepack (Otwinowski & Minor 1997)'   
_computing_structure_solution     'SIR97' 
_computing_structure_refinement   'SHELXL-97 (Sheldrick, 1997)'  
_computing_molecular_graphics     'maXus, Zortep'   
_computing_publication_material   'SHELXL-97 (Sheldrick, 1997)' 
 
_refine_special_details 
; 
 Refinement of F^2^ against ALL reflections.  The weighted R-factor wR and 
 goodness of fit S are based on F^2^, conventional R-factors R are based 
 on F, with F set to zero for negative F^2^. The threshold expression of 
 F^2^ > 2sigma(F^2^) is used only for calculating R-factors(gt) etc. and is 
 not relevant to the choice of reflections for refinement.  R-factors based 
 on F^2^ are statistically about twice as large as those based on F, and R- 
 factors based on ALL data will be even larger. 
; 
 
_refine_ls_structure_factor_coef  Fsqd  
_refine_ls_matrix_type            full 
_refine_ls_weighting_scheme       calc  
_refine_ls_weighting_details 
 'calc w=1/[\s^2^(Fo^2^)+(0.0395P)^2^+0.0000P] where P=(Fo^2^+2Fc^2^)/3' 
_atom_sites_solution_primary      direct 
_atom_sites_solution_secondary    difmap 
_atom_sites_solution_hydrogens    geom 
_refine_ls_hydrogen_treatment     constr
_refine_ls_extinction_method      none 
_refine_ls_extinction_coef        ? 
_refine_ls_number_reflns          6009 
_refine_ls_number_parameters      272 
_refine_ls_number_restraints      0 
_refine_ls_R_factor_all           0.0569 
_refine_ls_R_factor_gt            0.0355 
_refine_ls_wR_factor_ref          0.0873 
_refine_ls_wR_factor_gt           0.0797 
_refine_ls_goodness_of_fit_ref    1.042 
_refine_ls_restrained_S_all       1.042 
_refine_ls_shift/su_max           0.018 
_refine_ls_shift/su_mean          0.001 
 
loop_ 
 _atom_site_label 
 _atom_site_type_symbol 
 _atom_site_fract_x 
 _atom_site_fract_y 
 _atom_site_fract_z 
 _atom_site_U_iso_or_equiv 
 _atom_site_adp_type 
 _atom_site_occupancy 
 _atom_site_symmetry_multiplicity 
 _atom_site_calc_flag 
 _atom_site_refinement_flags 
 _atom_site_disorder_assembly 
 _atom_site_disorder_group 
Pd1 Pd 0.54982(2) 0.411591(10) -0.027009(13) 0.0274(3) Uani 1 1 d . . . 
Cl1 Cl 0.68679(7) 0.51533(4) 0.00979(5) 0.0343(3) Uani 1 1 d . . . 
Cl2 Cl 0.37777(7) 0.32048(4) -0.06361(5) 0.0377(3) Uani 1 1 d . . . 
P1 P 0.77636(8) 0.35029(4) -0.05099(4) 0.0274(3) Uani 1 1 d . . . 
O1 O 1.4473(3) 0.37745(18) 0.2897(2) 0.0820(9) Uani 1 1 d . . . 
C1 C 0.9584(3) 0.38962(15) 0.00512(17) 0.0297(6) Uani 1 1 d . . . 
H1A H 1.0522 0.3709 -0.0221 0.036 Uiso 1 1 calc R . . 
H1B H 0.9543 0.4411 -0.0061 0.036 Uiso 1 1 calc R . . 
C2 C 0.9926(3) 0.37986(14) 0.10042(17) 0.0310(7) Uani 1 1 d . . . 
C3 C 0.8846(3) 0.39891(15) 0.15840(19) 0.0363(7) Uani 1 1 d . . . 
H3 H 0.7816 0.4166 0.1384 0.044 Uiso 1 1 calc R . . 
C4 C 0.9253(4) 0.39234(16) 0.24536(19) 0.0420(8) Uani 1 1 d . . . 
H4 H 0.8500 0.4052 0.2846 0.050 Uiso 1 1 calc R . . 
C5 C 1.0751(4) 0.36713(17) 0.2750(2) 0.0448(8) Uani 1 1 d . . . 
H5 H 1.1025 0.3629 0.3347 0.054 Uiso 1 1 calc R . . 
C6 C 1.1855(4) 0.34795(16) 0.2186(2) 0.0415(8) Uani 1 1 d . . . 
C7 C 1.1427(3) 0.35484(15) 0.13143(19) 0.0358(7) Uani 1 1 d . . . 
H7 H 1.2182 0.3421 0.0923 0.043 Uiso 1 1 calc R . . 
C8 C 1.3521(4) 0.32273(18) 0.2505(2) 0.0566(10) Uani 1 1 d . . . 
H8A H 1.3425 0.2840 0.2920 0.068 Uiso 1 1 calc R . . 
H8B H 1.4063 0.3035 0.2019 0.068 Uiso 1 1 calc R . . 
C9 C 1.4873(4) 0.4244(2) 0.2391(3) 0.0721(13) Uani 1 1 d . . . 
H9A H 1.5727 0.4537 0.2675 0.086 Uiso 1 1 calc R . . 
H9B H 1.3938 0.4541 0.2217 0.086 Uiso 1 1 calc R . . 
H9C H 1.5265 0.4021 0.1887 0.086 Uiso 1 1 calc R . . 
C10 C 0.8109(3) 0.36552(14) -0.16561(17) 0.0309(7) Uani 1 1 d . . . 
C11 C 0.9414(3) 0.31798(16) -0.19825(18) 0.0379(7) Uani 1 1 d . . . 
H11A H 0.9587 0.3312 -0.2570 0.046 Uiso 1 1 calc R . . 
H11B H 0.9069 0.2685 -0.1967 0.046 Uiso 1 1 calc R . . 
H11C H 1.0419 0.3239 -0.1619 0.046 Uiso 1 1 calc R . . 
C12 C 0.8656(3) 0.44291(15) -0.17473(19) 0.0382(7) Uani 1 1 d . . . 
H12A H 0.8668 0.4547 -0.2353 0.046 Uiso 1 1 calc R . . 
H12B H 0.9740 0.4488 -0.1462 0.046 Uiso 1 1 calc R . . 
H12C H 0.7909 0.4744 -0.1484 0.046 Uiso 1 1 calc R . . 
C13 C 0.6523(3) 0.35509(17) -0.22216(18) 0.0401(8) Uani 1 1 d . . . 
H13A H 0.6707 0.3641 -0.2819 0.048 Uiso 1 1 calc R . . 
H13B H 0.5711 0.3881 -0.2043 0.048 Uiso 1 1 calc R . . 
H13C H 0.6144 0.3065 -0.2162 0.048 Uiso 1 1 calc R . . 
C14 C 0.7837(3) 0.25377(14) -0.02050(17) 0.0323(7) Uani 1 1 d . . . 
C15 C 0.9588(3) 0.22692(15) -0.0107(2) 0.0371(7) Uani 1 1 d . . . 
H15A H 0.9595 0.1760 0.0006 0.044 Uiso 1 1 calc R . . 
H15B H 1.0183 0.2515 0.0370 0.044 Uiso 1 1 calc R . . 
H15C H 1.0099 0.2363 -0.0633 0.044 Uiso 1 1 calc R . . 
C16 C 0.7119(3) 0.24658(15) 0.06573(18) 0.0377(7) Uani 1 1 d . . . 
H16A H 0.7081 0.1965 0.0815 0.045 Uiso 1 1 calc R . . 
H16B H 0.6027 0.2661 0.0612 0.045 Uiso 1 1 calc R . . 
H16C H 0.7790 0.2725 0.1095 0.045 Uiso 1 1 calc R . . 
C17 C 0.6875(3) 0.20728(15) -0.08628(19) 0.0368(7) Uani 1 1 d . . . 
H17A H 0.6853 0.1586 -0.0651 0.044 Uiso 1 1 calc R . . 
H17B H 0.7384 0.2082 -0.1401 0.044 Uiso 1 1 calc R . . 
H17C H 0.5773 0.2253 -0.0958 0.044 Uiso 1 1 calc R . . 
C18 C 0.2602(4) 0.03654(19) 0.0044(2) 0.0500(9) Uani 1 1 d . . . 
C19 C 0.1931(4) 0.01504(19) 0.0767(2) 0.0577(10) Uani 1 1 d . . . 
H19 H 0.1466 -0.0307 0.0784 0.069 Uiso 1 1 calc R . . 
C20 C 0.1916(4) 0.0586(2) 0.1475(2) 0.0599(10) Uani 1 1 d . . . 
H20 H 0.1453 0.0427 0.1971 0.072 Uiso 1 1 calc R . . 
C21 C 0.2579(4) 0.1254(2) 0.1453(2) 0.0553(9) Uani 1 1 d . . . 
H21 H 0.2588 0.1554 0.1937 0.066 Uiso 1 1 calc R . . 
C22 C 0.3223(4) 0.1481(2) 0.0733(2) 0.0547(9) Uani 1 1 d . . . 
H22 H 0.3657 0.1944 0.0712 0.066 Uiso 1 1 calc R . . 
C23 C 0.3246(4) 0.1036(2) 0.0030(2) 0.0533(9) Uani 1 1 d . . . 
H23 H 0.3710 0.1196 -0.0466 0.064 Uiso 1 1 calc R . . 
C24 C 0.2662(5) -0.0122(2) -0.0720(2) 0.0633(10) Uani 1 1 d . . . 
H24A H 0.1703 -0.0424 -0.0769 0.076 Uiso 1 1 calc R . . 
H24B H 0.3627 -0.0418 -0.0644 0.076 Uiso 1 1 calc R . . 
H24C H 0.2693 0.0161 -0.1240 0.076 Uiso 1 1 calc R . . 
 
loop_ 
 _atom_site_aniso_label 
 _atom_site_aniso_U_11 
 _atom_site_aniso_U_22 
 _atom_site_aniso_U_33 
 _atom_site_aniso_U_23 
 _atom_site_aniso_U_13 
 _atom_site_aniso_U_12 
Pd1 0.0234(3) 0.0272(3) 0.0319(3) -0.00158(9) 0.00353(8) -0.00053(8) 
Cl1 0.0253(4) 0.0291(5) 0.0486(5) -0.0044(3) 0.0042(3) -0.0002(3) 
Cl2 0.0276(4) 0.0335(5) 0.0523(5) -0.0093(3) 0.0048(3) -0.0038(3) 
P1 0.0255(4) 0.0277(5) 0.0292(5) -0.0012(3) 0.0025(3) 0.0004(3) 
O1 0.0713(18) 0.090(2) 0.079(2) -0.0035(18) -0.0233(16) 0.0147(17) 
C1 0.0270(13) 0.0289(14) 0.0327(15) -0.0020(11) 0.0001(10) 0.0002(11) 
C2 0.0346(14) 0.0254(14) 0.0328(15) -0.0030(12) 0.0012(11) -0.0046(11) 
C3 0.0349(15) 0.0360(17) 0.0377(17) -0.0039(13) 0.0018(12) -0.0022(12) 
C4 0.0536(19) 0.0385(17) 0.0349(17) -0.0033(13) 0.0106(13) -0.0088(14) 
C5 0.060(2) 0.0401(18) 0.0333(17) 0.0055(14) -0.0032(14) -0.0120(15) 
C6 0.0491(18) 0.0332(16) 0.0402(18) 0.0030(13) -0.0069(14) -0.0011(14) 
C7 0.0358(15) 0.0321(16) 0.0395(17) -0.0029(13) 0.0032(12) -0.0033(12) 
C8 0.061(2) 0.047(2) 0.057(2) -0.0021(17) -0.0247(17) 0.0056(17) 
C9 0.0216(16) 0.110(4) 0.084(3) 0.028(3) 0.0019(16) -0.0047(18) 
C10 0.0309(14) 0.0338(15) 0.0281(15) 0.0005(12) 0.0030(10) 0.0006(11) 
C11 0.0359(15) 0.0418(17) 0.0373(17) -0.0019(13) 0.0094(12) 0.0004(13) 
C12 0.0448(16) 0.0378(17) 0.0328(16) 0.0033(13) 0.0075(12) -0.0006(13) 
C13 0.0393(16) 0.0493(19) 0.0305(16) -0.0009(14) -0.0032(12) 0.0008(14) 
C14 0.0314(14) 0.0289(15) 0.0364(16) -0.0011(12) 0.0021(11) -0.0008(11) 
C15 0.0359(15) 0.0289(15) 0.0453(18) 0.0004(13) -0.0030(12) 0.0031(12) 
C16 0.0417(16) 0.0318(16) 0.0393(17) 0.0045(13) 0.0027(12) -0.0054(12) 
C17 0.0352(15) 0.0295(15) 0.0455(18) -0.0043(13) 0.0029(12) -0.0019(12) 
C18 0.0451(18) 0.054(2) 0.050(2) 0.0072(17) 0.0021(14) 0.0104(16) 
C19 0.070(2) 0.046(2) 0.058(2) 0.0086(18) 0.0099(18) 0.0009(17) 
C20 0.072(2) 0.054(2) 0.055(2) 0.0057(19) 0.0182(18) 0.0053(19) 
C21 0.0449(18) 0.058(2) 0.063(2) -0.0027(19) 0.0048(16) 0.0002(17) 
C22 0.0407(18) 0.053(2) 0.070(3) 0.0047(19) 0.0021(16) -0.0078(15) 
C23 0.0404(18) 0.068(3) 0.051(2) 0.0110(18) 0.0016(14) -0.0037(16) 
C24 0.068(2) 0.067(3) 0.054(2) 0.0049(19) 0.0024(18) 0.011(2) 
 
_geom_special_details 
; 
 All esds (except the esd in the dihedral angle between two l.s. planes) 
 are estimated using the full covariance matrix.  The cell esds are taken 
 into account individually in the estimation of esds in distances, angles 
 and torsion angles; correlations between esds in cell parameters are only 
 used when they are defined by crystal symmetry.  An approximate (isotropic) 
 treatment of cell esds is used for estimating esds involving l.s. planes. 
; 
 
loop_ 
 _geom_bond_atom_site_label_1 
 _geom_bond_atom_site_label_2 
 _geom_bond_distance 
 _geom_bond_site_symmetry_2 
 _geom_bond_publ_flag 
Pd1 P1 2.2765(7) . ? 
Pd1 Cl2 2.2849(7) . ? 
Pd1 Cl1 2.3192(7) . ? 
Pd1 Cl1 2.4442(6) 3_665 ? 
Cl1 Pd1 2.4442(6) 3_665 ? 
P1 C1 1.846(2) . ? 
P1 C10 1.873(3) . ? 
P1 C14 1.888(3) . ? 
O1 C9 1.257(5) . ? 
O1 C8 1.414(4) . ? 
C1 C2 1.514(4) . ? 
C1 H1A 0.9900 . ? 
C1 H1B 0.9900 . ? 
C2 C3 1.384(4) . ? 
C2 C7 1.388(4) . ? 
C3 C4 1.387(4) . ? 
C3 H3 0.9500 . ? 
C4 C5 1.381(4) . ? 
C4 H4 0.9500 . ? 
C5 C6 1.382(4) . ? 
C5 H5 0.9500 . ? 
C6 C7 1.393(4) . ? 
C6 C8 1.513(4) . ? 
C7 H7 0.9500 . ? 
C8 H8A 0.9900 . ? 
C8 H8B 0.9900 . ? 
C9 H9A 0.9800 . ? 
C9 H9B 0.9800 . ? 
C9 H9C 0.9800 . ? 
C10 C11 1.535(4) . ? 
C10 C13 1.542(3) . ? 
C10 C12 1.544(4) . ? 
C11 H11A 0.9800 . ? 
C11 H11B 0.9800 . ? 
C11 H11C 0.9800 . ? 
C12 H12A 0.9800 . ? 
C12 H12B 0.9800 . ? 
C12 H12C 0.9800 . ? 
C13 H13A 0.9800 . ? 
C13 H13B 0.9800 . ? 
C13 H13C 0.9800 . ? 
C14 C17 1.532(4) . ? 
C14 C16 1.536(4) . ? 
C14 C15 1.541(3) . ? 
C15 H15A 0.9800 . ? 
C15 H15B 0.9800 . ? 
C15 H15C 0.9800 . ? 
C16 H16A 0.9800 . ? 
C16 H16B 0.9800 . ? 
C16 H16C 0.9800 . ? 
C17 H17A 0.9800 . ? 
C17 H17B 0.9800 . ? 
C17 H17C 0.9800 . ? 
C18 C19 1.373(5) . ? 
C18 C23 1.379(5) . ? 
C18 C24 1.519(5) . ? 
C19 C20 1.386(5) . ? 
C19 H19 0.9500 . ? 
C20 C21 1.381(5) . ? 
C20 H20 0.9500 . ? 
C21 C22 1.364(5) . ? 
C21 H21 0.9500 . ? 
C22 C23 1.392(5) . ? 
C22 H22 0.9500 . ? 
C23 H23 0.9500 . ? 
C24 H24A 0.9800 . ? 
C24 H24B 0.9800 . ? 
C24 H24C 0.9800 . ? 
 
loop_ 
 _geom_angle_atom_site_label_1 
 _geom_angle_atom_site_label_2 
 _geom_angle_atom_site_label_3 
 _geom_angle 
 _geom_angle_site_symmetry_1 
 _geom_angle_site_symmetry_3 
 _geom_angle_publ_flag 
P1 Pd1 Cl2 94.95(2) . . ? 
P1 Pd1 Cl1 94.27(2) . . ? 
Cl2 Pd1 Cl1 170.62(2) . . ? 
P1 Pd1 Cl1 175.24(3) . 3_665 ? 
Cl2 Pd1 Cl1 87.65(2) . 3_665 ? 
Cl1 Pd1 Cl1 83.04(2) . 3_665 ? 
Pd1 Cl1 Pd1 96.96(2) . 3_665 ? 
C1 P1 C10 102.12(12) . . ? 
C1 P1 C14 105.13(12) . . ? 
C10 P1 C14 112.90(12) . . ? 
C1 P1 Pd1 112.07(9) . . ? 
C10 P1 Pd1 106.27(8) . . ? 
C14 P1 Pd1 117.39(9) . . ? 
C9 O1 C8 114.3(3) . . ? 
C2 C1 P1 120.12(19) . . ? 
C2 C1 H1A 107.3 . . ? 
P1 C1 H1A 107.3 . . ? 
C2 C1 H1B 107.3 . . ? 
P1 C1 H1B 107.3 . . ? 
H1A C1 H1B 106.9 . . ? 
C3 C2 C7 118.4(3) . . ? 
C3 C2 C1 122.9(2) . . ? 
C7 C2 C1 118.5(2) . . ? 
C2 C3 C4 120.6(3) . . ? 
C2 C3 H3 119.7 . . ? 
C4 C3 H3 119.7 . . ? 
C5 C4 C3 120.1(3) . . ? 
C5 C4 H4 119.9 . . ? 
C3 C4 H4 119.9 . . ? 
C4 C5 C6 120.5(3) . . ? 
C4 C5 H5 119.7 . . ? 
C6 C5 H5 119.7 . . ? 
C5 C6 C7 118.7(3) . . ? 
C5 C6 C8 120.9(3) . . ? 
C7 C6 C8 120.4(3) . . ? 
C2 C7 C6 121.6(3) . . ? 
C2 C7 H7 119.2 . . ? 
C6 C7 H7 119.2 . . ? 
O1 C8 C6 112.3(3) . . ? 
O1 C8 H8A 109.1 . . ? 
C6 C8 H8A 109.1 . . ? 
O1 C8 H8B 109.1 . . ? 
C6 C8 H8B 109.1 . . ? 
H8A C8 H8B 107.9 . . ? 
O1 C9 H9A 109.5 . . ? 
O1 C9 H9B 109.5 . . ? 
H9A C9 H9B 109.5 . . ? 
O1 C9 H9C 109.5 . . ? 
H9A C9 H9C 109.5 . . ? 
H9B C9 H9C 109.5 . . ? 
C11 C10 C13 109.3(2) . . ? 
C11 C10 C12 107.5(2) . . ? 
C13 C10 C12 108.3(2) . . ? 
C11 C10 P1 113.87(19) . . ? 
C13 C10 P1 109.91(18) . . ? 
C12 C10 P1 107.86(18) . . ? 
C10 C11 H11A 109.5 . . ? 
C10 C11 H11B 109.5 . . ? 
H11A C11 H11B 109.5 . . ? 
C10 C11 H11C 109.5 . . ? 
H11A C11 H11C 109.5 . . ? 
H11B C11 H11C 109.5 . . ? 
C10 C12 H12A 109.5 . . ? 
C10 C12 H12B 109.5 . . ? 
H12A C12 H12B 109.5 . . ? 
C10 C12 H12C 109.5 . . ? 
H12A C12 H12C 109.5 . . ? 
H12B C12 H12C 109.5 . . ? 
C10 C13 H13A 109.5 . . ? 
C10 C13 H13B 109.5 . . ? 
H13A C13 H13B 109.5 . . ? 
C10 C13 H13C 109.5 . . ? 
H13A C13 H13C 109.5 . . ? 
H13B C13 H13C 109.5 . . ? 
C17 C14 C16 108.9(2) . . ? 
C17 C14 C15 108.4(2) . . ? 
C16 C14 C15 108.7(2) . . ? 
C17 C14 P1 112.34(19) . . ? 
C16 C14 P1 107.67(18) . . ? 
C15 C14 P1 110.74(18) . . ? 
C14 C15 H15A 109.5 . . ? 
C14 C15 H15B 109.5 . . ? 
H15A C15 H15B 109.5 . . ? 
C14 C15 H15C 109.5 . . ? 
H15A C15 H15C 109.5 . . ? 
H15B C15 H15C 109.5 . . ? 
C14 C16 H16A 109.5 . . ? 
C14 C16 H16B 109.5 . . ? 
H16A C16 H16B 109.5 . . ? 
C14 C16 H16C 109.5 . . ? 
H16A C16 H16C 109.5 . . ? 
H16B C16 H16C 109.5 . . ? 
C14 C17 H17A 109.5 . . ? 
C14 C17 H17B 109.5 . . ? 
H17A C17 H17B 109.5 . . ? 
C14 C17 H17C 109.5 . . ? 
H17A C17 H17C 109.5 . . ? 
H17B C17 H17C 109.5 . . ? 
C19 C18 C23 118.2(3) . . ? 
C19 C18 C24 121.3(3) . . ? 
C23 C18 C24 120.5(3) . . ? 
C18 C19 C20 121.5(4) . . ? 
C18 C19 H19 119.3 . . ? 
C20 C19 H19 119.3 . . ? 
C21 C20 C19 119.5(4) . . ? 
C21 C20 H20 120.2 . . ? 
C19 C20 H20 120.2 . . ? 
C22 C21 C20 119.7(4) . . ? 
C22 C21 H21 120.1 . . ? 
C20 C21 H21 120.1 . . ? 
C21 C22 C23 120.2(3) . . ? 
C21 C22 H22 119.9 . . ? 
C23 C22 H22 119.9 . . ? 
C18 C23 C22 120.8(3) . . ? 
C18 C23 H23 119.6 . . ? 
C22 C23 H23 119.6 . . ? 
C18 C24 H24A 109.5 . . ? 
C18 C24 H24B 109.5 . . ? 
H24A C24 H24B 109.5 . . ? 
C18 C24 H24C 109.5 . . ? 
H24A C24 H24C 109.5 . . ? 
H24B C24 H24C 109.5 . . ? 
 
_diffrn_measured_fraction_theta_max    0.977 
_diffrn_reflns_theta_full              25.00 
_diffrn_measured_fraction_theta_full   1.000 
_refine_diff_density_max    0.861 
_refine_diff_density_min   -0.531 
_refine_diff_density_rms    0.066 


#===END


data_(4)

_audit_creation_method            SHELXL-97 
_chemical_name_systematic 
; 
 '(4)' 
; 
_chemical_name_common             '(tBuPCO)PdCl' 
_chemical_melting_point           ? 
_chemical_formula_moiety           'C17 H28 Cl O P Pd'
_chemical_formula_sum 
 'C17 H28 Cl O P Pd' 
_chemical_formula_weight          421.21 
 
loop_ 
 _atom_type_symbol 
 _atom_type_description 
 _atom_type_scat_dispersion_real 
 _atom_type_scat_dispersion_imag 
 _atom_type_scat_source 
 'C'  'C'   0.0033   0.0016 
 'International Tables Vol C Tables 4.2.6.8 and 6.1.1.4' 
 'H'  'H'   0.0000   0.0000 
 'International Tables Vol C Tables 4.2.6.8 and 6.1.1.4' 
 'O'  'O'   0.0106   0.0060 
 'International Tables Vol C Tables 4.2.6.8 and 6.1.1.4' 
 'Cl'  'Cl'   0.1484   0.1585 
 'International Tables Vol C Tables 4.2.6.8 and 6.1.1.4' 
 'P'  'P'   0.1023   0.0942 
 'International Tables Vol C Tables 4.2.6.8 and 6.1.1.4' 
 'Pd'  'Pd'  -0.9988   1.0072 
 'International Tables Vol C Tables 4.2.6.8 and 6.1.1.4' 
 
_symmetry_space_group_name_H-M 'C c           '
_symmetry_cell_setting 'Monoclinic'
_symmetry_space_group_name_Hall    'C -2yc'
_symmetry_Int_Tables_number        9 
loop_ 
 _symmetry_equiv_pos_as_xyz 
 'x, y, z' 
 'x, -y, z+1/2' 
 'x+1/2, y+1/2, z' 
 'x+1/2, -y+1/2, z+1/2' 
 
_cell_length_a                    13.9642(6) 
_cell_length_b                    16.3495(8) 
_cell_length_c                    8.1050(3) 
_cell_angle_alpha                 90.00 
_cell_angle_beta                  102.614(4) 
_cell_angle_gamma                 90.00 
_cell_volume                      1805.77(14) 
_cell_formula_units_Z             4 
_cell_measurement_temperature     130(2) 
_cell_measurement_reflns_used     303 
_cell_measurement_theta_min       3 
_cell_measurement_theta_max       20
 
_exptl_crystal_description        prism 
_exptl_crystal_colour             colorless 
_exptl_crystal_size_max           0.59 
_exptl_crystal_size_mid           0.24 
_exptl_crystal_size_min           0.22 
_exptl_crystal_density_meas       ? 
_exptl_crystal_density_diffrn     1.549 
_exptl_crystal_density_method     'not measured' 
_exptl_crystal_F_000              864 
_exptl_absorpt_coefficient_mu     1.261 
_exptl_absorpt_correction_type    'multi-scan' 
_exptl_absorpt_correction_T_min   0.5232 
_exptl_absorpt_correction_T_max   0.7688 
_exptl_absorpt_process_details    'HKL2008' 
 
_exptl_special_details 
; 
 Data was collected with \w and \f scans in 
 2^o^ increments  with 10 second  exposures
 per degree.  Crystal-to-detector distance was 30 mm.
 14831 full and partial reflection were integrated. 
; 
 
_diffrn_ambient_temperature       130(2) 
_diffrn_radiation_wavelength      0.71073 
_diffrn_radiation_type            MoK\a 
_diffrn_radiation_source          'fine-focus sealed tube' 
_diffrn_radiation_monochromator   graphite 
_diffrn_measurement_device_type   'Nonius KappaCCD' 
_diffrn_measurement_method        '\f and \w scans' 
_diffrn_reflns_number             3823 
_diffrn_reflns_av_R_equivalents   0.0371 
_diffrn_reflns_av_sigmaI/netI     0.0529 
_diffrn_reflns_limit_h_min        -18 
_diffrn_reflns_limit_h_max        18 
_diffrn_reflns_limit_k_min        -21 
_diffrn_reflns_limit_k_max        19 
_diffrn_reflns_limit_l_min        -10 
_diffrn_reflns_limit_l_max        10 
_diffrn_reflns_theta_min          2.49 
_diffrn_reflns_theta_max          28.29 
_reflns_number_total              3820 
_reflns_number_gt                 3454 
_reflns_threshold_expression      >2sigma(I) 
 
_computing_data_collection        'KappaCCD' 
_computing_cell_refinement        'HKL Scalepack (Otwinowski & Minor 1997)'    
_computing_data_reduction         'HKL Scalepack (Otwinowski & Minor 1997)'   
_computing_structure_solution     'SHELXS-97 (Sheldrick, 1990)' 
_computing_structure_refinement   'SHELXL-97 (Sheldrick, 1997)' 
_computing_molecular_graphics     'maXus, Zortep'   
_computing_publication_material   'SHELXL-97 (Sheldrick, 1997)'
 
_refine_special_details 
; 
 Refinement of F^2^ against ALL reflections.  The weighted R-factor wR and 
 goodness of fit S are based on F^2^, conventional R-factors R are based 
 on F, with F set to zero for negative F^2^. The threshold expression of 
 F^2^ > 2sigma(F^2^) is used only for calculating R-factors(gt) etc. and is 
 not relevant to the choice of reflections for refinement.  R-factors based 
 on F^2^ are statistically about twice as large as those based on F, and R- 
 factors based on ALL data will be even larger. 
; 
 
_refine_ls_structure_factor_coef  Fsqd  
_refine_ls_matrix_type            full 
_refine_ls_weighting_scheme       calc  
_refine_ls_weighting_details 
 'calc w=1/[\s^2^(Fo^2^)+(0.0455P)^2^+0.0000P] where P=(Fo^2^+2Fc^2^)/3' 
_atom_sites_solution_primary      direct 
_atom_sites_solution_secondary    difmap 
_atom_sites_solution_hydrogens    geom 
_refine_ls_hydrogen_treatment     constr 
_refine_ls_extinction_method      none 
_refine_ls_extinction_coef        ? 
_refine_ls_abs_structure_details 
 'Flack H D (1983), Acta Cryst. A39, 876-881' 
_refine_ls_abs_structure_Flack    0.46(3)
_refine_ls_number_reflns          3820 
_refine_ls_number_parameters      198 
_refine_ls_number_restraints      2 
_refine_ls_R_factor_all           0.0425 
_refine_ls_R_factor_gt            0.0357 
_refine_ls_wR_factor_ref          0.0818 
_refine_ls_wR_factor_gt           0.0792 
_refine_ls_goodness_of_fit_ref    1.047 
_refine_ls_restrained_S_all       1.046 
_refine_ls_shift/su_max           0.000 
_refine_ls_shift/su_mean          0.000 
 
loop_ 
 _atom_site_label 
 _atom_site_type_symbol 
 _atom_site_fract_x 
 _atom_site_fract_y 
 _atom_site_fract_z 
 _atom_site_U_iso_or_equiv 
 _atom_site_adp_type 
 _atom_site_occupancy 
 _atom_site_symmetry_multiplicity 
 _atom_site_calc_flag 
 _atom_site_refinement_flags 
 _atom_site_disorder_assembly 
 _atom_site_disorder_group 
Pd1 Pd 0.36704(3) 0.146084(16) 0.20787(3) 0.01663(9) Uani 1 1 d . . . 
Cl1 Cl 0.50160(9) 0.17988(8) 0.07906(14) 0.0236(3) Uani 1 1 d . . . 
P1 P 0.30395(8) 0.26608(7) 0.24902(14) 0.0195(2) Uani 1 1 d . . . 
O1 O 0.4008(2) 0.0179(2) 0.2216(4) 0.0253(8) Uani 1 1 d . . . 
C1 C 0.2564(3) 0.1047(3) 0.3004(5) 0.0198(9) Uani 1 1 d . . . 
C2 C 0.1852(4) 0.1541(3) 0.3473(6) 0.0203(10) Uani 1 1 d . . . 
C3 C 0.1118(4) 0.1187(3) 0.4161(6) 0.0259(10) Uani 1 1 d . . . 
H3 H 0.0640 0.1523 0.4497 0.031 Uiso 1 1 calc R . . 
C4 C 0.1087(3) 0.0350(3) 0.4353(6) 0.0275(11) Uani 1 1 d . . . 
H4 H 0.0579 0.0113 0.4808 0.033 Uiso 1 1 calc R . . 
C5 C 0.1788(4) -0.0152(3) 0.3889(6) 0.0251(10) Uani 1 1 d . . . 
H5 H 0.1758 -0.0727 0.4026 0.030 Uiso 1 1 calc R . . 
C6 C 0.2536(3) 0.0194(3) 0.3222(5) 0.0174(9) Uani 1 1 d . . . 
C7 C 0.3283(4) -0.0343(3) 0.2694(6) 0.0214(10) Uani 1 1 d . . . 
H7A H 0.3595 -0.0704 0.3641 0.026 Uiso 1 1 calc R . . 
H7B H 0.2967 -0.0690 0.1727 0.026 Uiso 1 1 calc R . . 
C8 C 0.1859(3) 0.2437(3) 0.3078(6) 0.0259(11) Uani 1 1 d . . . 
H8A H 0.1796 0.2764 0.4078 0.031 Uiso 1 1 calc R . . 
H8B H 0.1304 0.2575 0.2132 0.031 Uiso 1 1 calc R . . 
C9 C 0.2717(4) 0.3333(4) 0.0549(7) 0.0251(12) Uani 1 1 d . . . 
C10 C 0.2310(4) 0.2731(4) -0.0884(6) 0.0339(12) Uani 1 1 d . . . 
H10A H 0.2049 0.3036 -0.1926 0.041 Uiso 1 1 calc R . . 
H10B H 0.1783 0.2406 -0.0583 0.041 Uiso 1 1 calc R . . 
H10C H 0.2836 0.2367 -0.1058 0.041 Uiso 1 1 calc R . . 
C11 C 0.1927(4) 0.3974(4) 0.0666(8) 0.0401(14) Uani 1 1 d . . . 
H11A H 0.1773 0.4293 -0.0382 0.048 Uiso 1 1 calc R . . 
H11B H 0.2171 0.4339 0.1623 0.048 Uiso 1 1 calc R . . 
H11C H 0.1332 0.3696 0.0831 0.048 Uiso 1 1 calc R . . 
C12 C 0.3624(4) 0.3740(4) 0.0186(8) 0.0332(12) Uani 1 1 d . . . 
H12A H 0.3478 0.3951 -0.0973 0.040 Uiso 1 1 calc R . . 
H12B H 0.4157 0.3339 0.0316 0.040 Uiso 1 1 calc R . . 
H12C H 0.3824 0.4192 0.0981 0.040 Uiso 1 1 calc R . . 
C13 C 0.3806(4) 0.3184(3) 0.4374(6) 0.0261(10) Uani 1 1 d . . . 
C14 C 0.3367(5) 0.4011(3) 0.4764(8) 0.0386(13) Uani 1 1 d . . . 
H14A H 0.3693 0.4192 0.5900 0.046 Uiso 1 1 calc R . . 
H14B H 0.2663 0.3945 0.4707 0.046 Uiso 1 1 calc R . . 
H14C H 0.3466 0.4419 0.3932 0.046 Uiso 1 1 calc R . . 
C15 C 0.4854(4) 0.3298(4) 0.4149(8) 0.0355(14) Uani 1 1 d . . . 
H15A H 0.5267 0.3501 0.5207 0.043 Uiso 1 1 calc R . . 
H15B H 0.4859 0.3694 0.3243 0.043 Uiso 1 1 calc R . . 
H15C H 0.5110 0.2773 0.3854 0.043 Uiso 1 1 calc R . . 
C16 C 0.3845(4) 0.2604(3) 0.5867(6) 0.0340(12) Uani 1 1 d . . . 
H16A H 0.4258 0.2844 0.6887 0.041 Uiso 1 1 calc R . . 
H16B H 0.4122 0.2079 0.5625 0.041 Uiso 1 1 calc R . . 
H16C H 0.3180 0.2519 0.6045 0.041 Uiso 1 1 calc R . . 
C17 C 0.4800(4) -0.0269(3) 0.1759(6) 0.0260(10) Uani 1 1 d . . . 
H17A H 0.5087 -0.0645 0.2676 0.031 Uiso 1 1 calc R . . 
H17B H 0.5304 0.0115 0.1568 0.031 Uiso 1 1 calc R . . 
H17C H 0.4549 -0.0581 0.0723 0.031 Uiso 1 1 calc R . . 
 
loop_ 
 _atom_site_aniso_label 
 _atom_site_aniso_U_11 
 _atom_site_aniso_U_22 
 _atom_site_aniso_U_33 
 _atom_site_aniso_U_23 
 _atom_site_aniso_U_13 
 _atom_site_aniso_U_12 
Pd1 0.01591(15) 0.01533(15) 0.01936(14) -0.00079(17) 0.00541(10) -0.00005(17) 
Cl1 0.0215(6) 0.0229(6) 0.0292(6) -0.0030(5) 0.0115(5) -0.0028(5) 
P1 0.0192(6) 0.0157(6) 0.0252(6) 0.0016(4) 0.0084(5) 0.0013(5) 
O1 0.0256(18) 0.0165(16) 0.039(2) -0.0018(14) 0.0183(17) 0.0018(12) 
C1 0.017(2) 0.023(3) 0.018(2) 0.0016(18) -0.0009(17) -0.0011(19) 
C2 0.022(3) 0.025(3) 0.015(2) 0.0009(17) 0.0042(18) 0.0004(19) 
C3 0.026(3) 0.026(2) 0.030(3) 0.004(2) 0.014(2) 0.004(2) 
C4 0.021(2) 0.036(3) 0.026(2) 0.002(2) 0.0050(19) -0.007(2) 
C5 0.033(3) 0.021(3) 0.021(2) 0.0055(19) 0.0064(19) -0.004(2) 
C6 0.016(2) 0.020(2) 0.016(2) -0.0010(17) 0.0026(16) -0.0043(18) 
C7 0.028(3) 0.017(2) 0.021(2) 0.0008(18) 0.0072(19) -0.0023(19) 
C8 0.018(2) 0.023(3) 0.038(3) 0.003(2) 0.010(2) 0.0046(19) 
C9 0.020(3) 0.026(3) 0.031(3) 0.009(2) 0.010(2) 0.005(2) 
C10 0.027(3) 0.043(3) 0.029(3) 0.004(2) 0.001(2) 0.002(2) 
C11 0.043(3) 0.035(3) 0.047(3) 0.017(3) 0.020(3) 0.023(3) 
C12 0.029(3) 0.029(3) 0.043(3) 0.013(2) 0.009(2) 0.006(2) 
C13 0.036(3) 0.016(3) 0.027(3) -0.007(2) 0.009(2) 0.000(2) 
C14 0.044(3) 0.027(3) 0.046(3) -0.006(3) 0.014(3) 0.006(3) 
C15 0.028(3) 0.040(3) 0.036(3) -0.006(3) 0.001(2) -0.007(3) 
C16 0.045(3) 0.031(3) 0.024(3) -0.002(2) 0.004(2) 0.002(2) 
C17 0.027(3) 0.018(2) 0.034(3) -0.004(2) 0.010(2) 0.009(2) 
 
_geom_special_details 
; 
 All esds (except the esd in the dihedral angle between two l.s. planes) 
 are estimated using the full covariance matrix.  The cell esds are taken 
 into account individually in the estimation of esds in distances, angles 
 and torsion angles; correlations between esds in cell parameters are only 
 used when they are defined by crystal symmetry.  An approximate (isotropic) 
 treatment of cell esds is used for estimating esds involving l.s. planes. 
; 
 
loop_ 
 _geom_bond_atom_site_label_1 
 _geom_bond_atom_site_label_2 
 _geom_bond_distance 
 _geom_bond_site_symmetry_2 
 _geom_bond_publ_flag 
Pd1 C1 1.978(4) . ? 
Pd1 O1 2.146(3) . ? 
Pd1 P1 2.2055(12) . ? 
Pd1 Cl1 2.4047(11) . ? 
P1 C8 1.850(5) . ? 
P1 C13 1.870(5) . ? 
P1 C9 1.891(6) . ? 
O1 C17 1.440(5) . ? 
O1 C7 1.440(5) . ? 
C1 C2 1.396(7) . ? 
C1 C6 1.408(6) . ? 
C2 C3 1.395(7) . ? 
C2 C8 1.500(7) . ? 
C3 C4 1.379(7) . ? 
C3 H3 0.9500 . ? 
C4 C5 1.390(7) . ? 
C4 H4 0.9500 . ? 
C5 C6 1.396(6) . ? 
C5 H5 0.9500 . ? 
C6 C7 1.495(6) . ? 
C7 H7A 0.9900 . ? 
C7 H7B 0.9900 . ? 
C8 H8A 0.9900 . ? 
C8 H8B 0.9900 . ? 
C9 C12 1.516(8) . ? 
C9 C10 1.534(8) . ? 
C9 C11 1.539(7) . ? 
C10 H10A 0.9800 . ? 
C10 H10B 0.9800 . ? 
C10 H10C 0.9800 . ? 
C11 H11A 0.9800 . ? 
C11 H11B 0.9800 . ? 
C11 H11C 0.9800 . ? 
C12 H12A 0.9800 . ? 
C12 H12B 0.9800 . ? 
C12 H12C 0.9800 . ? 
C13 C15 1.526(8) . ? 
C13 C16 1.528(7) . ? 
C13 C14 1.544(7) . ? 
C14 H14A 0.9800 . ? 
C14 H14B 0.9800 . ? 
C14 H14C 0.9800 . ? 
C15 H15A 0.9800 . ? 
C15 H15B 0.9800 . ? 
C15 H15C 0.9800 . ? 
C16 H16A 0.9800 . ? 
C16 H16B 0.9800 . ? 
C16 H16C 0.9800 . ? 
C17 H17A 0.9800 . ? 
C17 H17B 0.9800 . ? 
C17 H17C 0.9800 . ? 
 
loop_ 
 _geom_angle_atom_site_label_1 
 _geom_angle_atom_site_label_2 
 _geom_angle_atom_site_label_3 
 _geom_angle 
 _geom_angle_site_symmetry_1 
 _geom_angle_site_symmetry_3 
 _geom_angle_publ_flag 
C1 Pd1 O1 80.07(16) . . ? 
C1 Pd1 P1 82.86(14) . . ? 
O1 Pd1 P1 162.08(8) . . ? 
C1 Pd1 Cl1 172.85(14) . . ? 
O1 Pd1 Cl1 93.63(8) . . ? 
P1 Pd1 Cl1 103.71(4) . . ? 
C8 P1 C13 105.3(2) . . ? 
C8 P1 C9 105.4(2) . . ? 
C13 P1 C9 113.8(2) . . ? 
C8 P1 Pd1 105.73(16) . . ? 
C13 P1 Pd1 110.76(17) . . ? 
C9 P1 Pd1 114.94(18) . . ? 
C17 O1 C7 113.1(4) . . ? 
C17 O1 Pd1 130.9(3) . . ? 
C7 O1 Pd1 115.7(3) . . ? 
C2 C1 C6 119.9(4) . . ? 
C2 C1 Pd1 124.5(4) . . ? 
C6 C1 Pd1 115.6(3) . . ? 
C3 C2 C1 119.8(4) . . ? 
C3 C2 C8 122.0(4) . . ? 
C1 C2 C8 118.0(4) . . ? 
C4 C3 C2 120.1(4) . . ? 
C4 C3 H3 120.0 . . ? 
C2 C3 H3 120.0 . . ? 
C3 C4 C5 120.9(4) . . ? 
C3 C4 H4 119.6 . . ? 
C5 C4 H4 119.6 . . ? 
C4 C5 C6 119.8(4) . . ? 
C4 C5 H5 120.1 . . ? 
C6 C5 H5 120.1 . . ? 
C5 C6 C1 119.5(4) . . ? 
C5 C6 C7 120.1(4) . . ? 
C1 C6 C7 120.4(4) . . ? 
O1 C7 C6 107.7(4) . . ? 
O1 C7 H7A 110.2 . . ? 
C6 C7 H7A 110.2 . . ? 
O1 C7 H7B 110.2 . . ? 
C6 C7 H7B 110.2 . . ? 
H7A C7 H7B 108.5 . . ? 
C2 C8 P1 107.2(3) . . ? 
C2 C8 H8A 110.3 . . ? 
P1 C8 H8A 110.3 . . ? 
C2 C8 H8B 110.3 . . ? 
P1 C8 H8B 110.3 . . ? 
H8A C8 H8B 108.5 . . ? 
C12 C9 C10 108.8(5) . . ? 
C12 C9 C11 110.7(5) . . ? 
C10 C9 C11 109.3(5) . . ? 
C12 C9 P1 111.0(4) . . ? 
C10 C9 P1 103.8(4) . . ? 
C11 C9 P1 112.8(4) . . ? 
C9 C10 H10A 109.5 . . ? 
C9 C10 H10B 109.5 . . ? 
H10A C10 H10B 109.5 . . ? 
C9 C10 H10C 109.5 . . ? 
H10A C10 H10C 109.5 . . ? 
H10B C10 H10C 109.5 . . ? 
C9 C11 H11A 109.5 . . ? 
C9 C11 H11B 109.5 . . ? 
H11A C11 H11B 109.5 . . ? 
C9 C11 H11C 109.5 . . ? 
H11A C11 H11C 109.5 . . ? 
H11B C11 H11C 109.5 . . ? 
C9 C12 H12A 109.5 . . ? 
C9 C12 H12B 109.5 . . ? 
H12A C12 H12B 109.5 . . ? 
C9 C12 H12C 109.5 . . ? 
H12A C12 H12C 109.5 . . ? 
H12B C12 H12C 109.5 . . ? 
C15 C13 C16 107.5(5) . . ? 
C15 C13 C14 110.6(5) . . ? 
C16 C13 C14 109.1(4) . . ? 
C15 C13 P1 110.6(3) . . ? 
C16 C13 P1 106.1(4) . . ? 
C14 C13 P1 112.7(4) . . ? 
C13 C14 H14A 109.5 . . ? 
C13 C14 H14B 109.5 . . ? 
H14A C14 H14B 109.5 . . ? 
C13 C14 H14C 109.5 . . ? 
H14A C14 H14C 109.5 . . ? 
H14B C14 H14C 109.5 . . ? 
C13 C15 H15A 109.5 . . ? 
C13 C15 H15B 109.5 . . ? 
H15A C15 H15B 109.5 . . ? 
C13 C15 H15C 109.5 . . ? 
H15A C15 H15C 109.5 . . ? 
H15B C15 H15C 109.5 . . ? 
C13 C16 H16A 109.5 . . ? 
C13 C16 H16B 109.5 . . ? 
H16A C16 H16B 109.5 . . ? 
C13 C16 H16C 109.5 . . ? 
H16A C16 H16C 109.5 . . ? 
H16B C16 H16C 109.5 . . ? 
O1 C17 H17A 109.5 . . ? 
O1 C17 H17B 109.5 . . ? 
H17A C17 H17B 109.5 . . ? 
O1 C17 H17C 109.5 . . ? 
H17A C17 H17C 109.5 . . ? 
H17B C17 H17C 109.5 . . ? 
 
_diffrn_measured_fraction_theta_max    0.959 
_diffrn_reflns_theta_full              25.00 
_diffrn_measured_fraction_theta_full   0.999 
_refine_diff_density_max    0.751 
_refine_diff_density_min   -1.017 
_refine_diff_density_rms    0.101 


#===END


data_(6)

_audit_creation_method            SHELXL-97
_chemical_name_systematic 
; 
'(6)'
;   
_chemical_name_common             '[(tBuPCO)Pd]2(?-OH)[B(ArF)4]' 
_chemical_melting_point           ? 
_chemical_formula_moiety          
'2(C34 H57 O3 P2 Pd2), 2(C32 H12 B F24), C7 H8'
_chemical_formula_sum 
 'C139 H146 B2 F48 O6 P4 Pd4' 
_chemical_formula_weight          3395.66 
 
loop_ 
 _atom_type_symbol 
 _atom_type_description 
 _atom_type_scat_dispersion_real 
 _atom_type_scat_dispersion_imag 
 _atom_type_scat_source 
 'C'  'C'   0.0033   0.0016 
 'International Tables Vol C Tables 4.2.6.8 and 6.1.1.4' 
 'H'  'H'   0.0000   0.0000 
 'International Tables Vol C Tables 4.2.6.8 and 6.1.1.4' 
 'B'  'B'   0.0013   0.0007 
 'International Tables Vol C Tables 4.2.6.8 and 6.1.1.4' 
 'F'  'F'   0.0171   0.0103 
 'International Tables Vol C Tables 4.2.6.8 and 6.1.1.4' 
 'O'  'O'   0.0106   0.0060 
 'International Tables Vol C Tables 4.2.6.8 and 6.1.1.4' 
 'P'  'P'   0.1023   0.0942 
 'International Tables Vol C Tables 4.2.6.8 and 6.1.1.4' 
 'Pd'  'Pd'  -0.9988   1.0072 
 'International Tables Vol C Tables 4.2.6.8 and 6.1.1.4' 
 
_symmetry_space_group_name_H-M 'P -1          '
_symmetry_cell_setting 'Triclinic'
_symmetry_space_group_name_Hall	'-P 1'
_symmetry_Int_Tables_number        2
 
loop_ 
 _symmetry_equiv_pos_as_xyz 
 'x, y, z' 
 '-x, -y, -z' 
 
_cell_length_a                    9.7961(10) 
_cell_length_b                    19.388(3) 
_cell_length_c                    19.765(2) 
_cell_angle_alpha                 96.546(13) 
_cell_angle_beta                  96.997(12) 
_cell_angle_gamma                 96.935(4) 
_cell_volume                      3667.0(8) 
_cell_formula_units_Z             1 
_cell_measurement_temperature     130(2) 
_cell_measurement_reflns_used     338 
_cell_measurement_theta_min       3 
_cell_measurement_theta_max       20 
 
_exptl_crystal_description        plate 
_exptl_crystal_colour             colorless 
_exptl_crystal_size_max           0.35 
_exptl_crystal_size_mid           0.20 
_exptl_crystal_size_min           0.02 
_exptl_crystal_density_meas       ? 
_exptl_crystal_density_diffrn     1.538 
_exptl_crystal_density_method     'not measured' 
_exptl_crystal_F_000              1714 
_exptl_absorpt_coefficient_mu     0.639 
_exptl_absorpt_correction_type    'multi-scan' 
_exptl_absorpt_correction_T_min   0.8072 
_exptl_absorpt_correction_T_max   0.9873 
_exptl_absorpt_process_details    'HKL2008' 
 
_exptl_special_details 
; 
 Data was collected with \w and \f scans in 
 2^o^ increments  with 50 second  exposures
 per degree.  Crystal-to-detector distance was 30 mm.
 71296 full and partial reflection were integrated. 
; 
 
_diffrn_ambient_temperature       130(2) 
_diffrn_radiation_wavelength      0.71073 
_diffrn_radiation_type            MoK\a 
_diffrn_radiation_source          'fine-focus sealed tube' 
_diffrn_radiation_monochromator   graphite 
_diffrn_measurement_device_type   'Nonius KappaCCD' 
_diffrn_measurement_method        '\f and \w scans' 
_diffrn_reflns_number             20342 
_diffrn_reflns_av_R_equivalents   0.1717 
_diffrn_reflns_av_sigmaI/netI     0.3537 
_diffrn_reflns_limit_h_min        -11 
_diffrn_reflns_limit_h_max        11 
_diffrn_reflns_limit_k_min        -23 
_diffrn_reflns_limit_k_max        21 
_diffrn_reflns_limit_l_min        -20 
_diffrn_reflns_limit_l_max        23 
_diffrn_reflns_theta_min          2.11 
_diffrn_reflns_theta_max          25.30 
_reflns_number_total              12420 
_reflns_number_gt                 4098 
_reflns_threshold_expression      >2sigma(I) 
 
_computing_data_collection        'KappaCCD' 
_computing_cell_refinement        'HKL Scalepack (Otwinowski & Minor 1997)'    
_computing_data_reduction         'HKL Scalepack (Otwinowski & Minor 1997)'   
_computing_structure_solution     'SHELXS-97 (Sheldrick, 1997)'
_computing_structure_refinement   'SHELXL-97 (Sheldrick, 1997)'  
_computing_molecular_graphics     'maXus, Zortep'   
_computing_publication_material   'SHELXL-97 (Sheldrick, 1997)'
 
_refine_special_details 
; 
 Refinement of F^2^ against ALL reflections.  The weighted R-factor wR and 
 goodness of fit S are based on F^2^, conventional R-factors R are based 
 on F, with F set to zero for negative F^2^. The threshold expression of 
 F^2^ > 2sigma(F^2^) is used only for calculating R-factors(gt) etc. and is 
 not relevant to the choice of reflections for refinement.  R-factors based 
 on F^2^ are statistically about twice as large as those based on F, and R- 
 factors based on ALL data will be even larger. 
; 
 
_refine_ls_structure_factor_coef  Fsqd  
_refine_ls_matrix_type            full 
_refine_ls_weighting_scheme       calc  
_refine_ls_weighting_details 
 'calc w=1/[\s^2^(Fo^2^)+(0.0100P)^2^+0.0000P] where P=(Fo^2^+2Fc^2^)/3' 
_atom_sites_solution_primary      direct 
_atom_sites_solution_secondary    difmap 
_atom_sites_solution_hydrogens    geom 
_refine_ls_hydrogen_treatment     constr  
_refine_ls_extinction_method      none 
_refine_ls_extinction_coef        ? 
_refine_ls_number_reflns          12420 
_refine_ls_number_parameters      913 
_refine_ls_number_restraints      82 
_refine_ls_R_factor_all           0.2446 
_refine_ls_R_factor_gt            0.0707 
_refine_ls_wR_factor_ref          0.1684 
_refine_ls_wR_factor_gt           0.1166 
_refine_ls_goodness_of_fit_ref    0.870 
_refine_ls_restrained_S_all       0.902 
_refine_ls_shift/su_max           0.001 
_refine_ls_shift/su_mean          0.000 
 
loop_ 
 _atom_site_label 
 _atom_site_type_symbol 
 _atom_site_fract_x 
 _atom_site_fract_y 
 _atom_site_fract_z 
 _atom_site_U_iso_or_equiv 
 _atom_site_adp_type 
 _atom_site_occupancy 
 _atom_site_symmetry_multiplicity 
 _atom_site_calc_flag 
 _atom_site_refinement_flags 
 _atom_site_disorder_assembly 
 _atom_site_disorder_group 
Pd1 Pd 0.26897(10) 0.20484(5) 0.74578(4) 0.0404(3) Uani 1 1 d . B . 
Pd2 Pd 0.60591(10) 0.27921(5) 0.66411(4) 0.0404(3) Uani 1 1 d . B . 
P1 P 0.2879(3) 0.15940(17) 0.84362(14) 0.0400(8) Uani 1 1 d . B . 
P2 P 0.7194(4) 0.38230(17) 0.71039(14) 0.0472(9) Uani 1 1 d . . . 
F1 F 0.2527(11) 0.3651(6) 0.4066(5) 0.129(4) Uani 1 1 d U . . 
F2 F 0.3538(10) 0.3087(6) 0.4712(4) 0.123(4) Uani 1 1 d U . . 
F3 F 0.3854(12) 0.4163(6) 0.4882(6) 0.184(5) Uani 1 1 d U . . 
F4 F 0.9539(7) 0.4371(4) 0.3913(3) 0.068(2) Uani 1 1 d . . . 
F5 F 0.8489(8) 0.5003(4) 0.4554(4) 0.103(3) Uani 1 1 d . . . 
F6 F 0.8401(8) 0.5106(4) 0.3488(5) 0.108(4) Uani 1 1 d . . . 
F7 F 0.0845(8) 0.3380(5) 0.1291(5) 0.102(3) Uani 1 1 d . . . 
F8 F 0.1312(8) 0.4145(4) 0.0664(4) 0.100(3) Uani 1 1 d . . . 
F9 F 0.1175(8) 0.3109(5) 0.0251(4) 0.110(3) Uani 1 1 d . . . 
F10 F 0.6416(13) 0.5106(6) 0.0835(6) 0.171(5) Uani 1 1 d U . . 
F11 F 0.6422(11) 0.4386(5) 0.0028(4) 0.134(4) Uani 1 1 d U . . 
F12 F 0.7792(11) 0.4450(6) 0.0932(6) 0.175(5) Uani 1 1 d U . . 
F13 F 0.8470(8) 0.2092(5) 0.0172(4) 0.095(3) Uani 1 1 d DU . . 
F14 F 0.7801(15) 0.1094(5) 0.0287(4) 0.196(5) Uani 1 1 d DU . . 
F15 F 0.9921(14) 0.1523(7) 0.0498(5) 0.189(5) Uani 1 1 d DU . . 
F16 F 1.0460(8) 0.1125(4) 0.3046(3) 0.080(2) Uani 1 1 d . . . 
F17 F 1.1564(8) 0.2121(5) 0.3007(4) 0.107(3) Uani 1 1 d . . . 
F18 F 0.9997(8) 0.1992(5) 0.3670(4) 0.109(3) Uani 1 1 d . . . 
F19 F 0.2131(7) 0.0747(3) 0.0559(3) 0.060(2) Uani 1 1 d . . . 
F20 F 0.0953(7) 0.0137(4) 0.1158(3) 0.063(2) Uani 1 1 d . . . 
F21 F 0.2845(8) -0.0162(4) 0.0906(3) 0.083(3) Uani 1 1 d . . . 
F22 F 0.3035(10) 0.0027(4) 0.3565(3) 0.113(4) Uani 1 1 d . . . 
F23 F 0.3216(7) 0.1077(3) 0.4062(3) 0.059(2) Uani 1 1 d . . . 
F24 F 0.5043(9) 0.0614(4) 0.3907(3) 0.081(3) Uani 1 1 d . . . 
O1 O 0.4774(7) 0.2484(4) 0.7369(3) 0.043(2) Uani 1 1 d . . . 
H1O H 0.5444 0.2604 0.7775 0.052 Uiso 1 1 d R B . 
O2 O 0.1788(8) 0.2330(4) 0.6480(3) 0.049(2) Uani 1 1 d . . . 
O3 O 0.5301(8) 0.1847(4) 0.5950(3) 0.047(2) Uani 1 1 d . . . 
C1 C 0.0730(11) 0.1730(6) 0.7468(5) 0.038(3) Uani 1 1 d . . . 
C2 C 0.0150(12) 0.1553(5) 0.8043(5) 0.038(3) Uani 1 1 d . B . 
C3 C -0.1288(12) 0.1361(6) 0.8017(6) 0.046(3) Uani 1 1 d . . . 
H3 H -0.1663 0.1238 0.8414 0.056 Uiso 1 1 calc R B . 
C4 C -0.2139(12) 0.1354(6) 0.7414(6) 0.046(3) Uani 1 1 d . B . 
H4 H -0.3112 0.1223 0.7388 0.055 Uiso 1 1 calc R . . 
C5 C -0.1564(12) 0.1541(6) 0.6840(6) 0.045(3) Uani 1 1 d . . . 
H5 H -0.2154 0.1531 0.6419 0.053 Uiso 1 1 calc R B . 
C6 C -0.0142(12) 0.1743(6) 0.6870(5) 0.042(3) Uani 1 1 d . B . 
C7 C 0.0458(11) 0.1965(6) 0.6257(5) 0.045(3) Uani 1 1 d . B . 
H7A H 0.0511 0.1550 0.5925 0.054 Uiso 1 1 calc R . . 
H7B H -0.0137 0.2271 0.6026 0.054 Uiso 1 1 calc R . . 
C8 C 0.1137(10) 0.1568(5) 0.8696(5) 0.036(3) Uani 1 1 d . . . 
H8A H 0.0907 0.1145 0.8919 0.043 Uiso 1 1 calc R B . 
H8B H 0.1086 0.1988 0.9023 0.043 Uiso 1 1 calc R . . 
C9 C 0.2409(12) 0.2672(6) 0.5950(5) 0.057(4) Uani 1 1 d . B . 
H9A H 0.1853 0.3031 0.5807 0.069 Uiso 1 1 calc R . . 
H9B H 0.2437 0.2323 0.5554 0.069 Uiso 1 1 calc R . . 
H9C H 0.3356 0.2892 0.6134 0.069 Uiso 1 1 calc R . . 
C10 C 0.3215(11) 0.0656(6) 0.8318(5) 0.038(3) Uani 1 1 d . . . 
C11 C 0.3439(12) 0.0352(6) 0.8992(5) 0.060(4) Uani 1 1 d . B . 
H11A H 0.3601 -0.0137 0.8898 0.072 Uiso 1 1 calc R . . 
H11B H 0.2614 0.0372 0.9224 0.072 Uiso 1 1 calc R . . 
H11C H 0.4246 0.0623 0.9287 0.072 Uiso 1 1 calc R . . 
C12 C 0.1940(11) 0.0251(6) 0.7873(5) 0.047(3) Uani 1 1 d . B . 
H12A H 0.2076 -0.0241 0.7776 0.056 Uiso 1 1 calc R . . 
H12B H 0.1789 0.0449 0.7440 0.056 Uiso 1 1 calc R . . 
H12C H 0.1129 0.0281 0.8115 0.056 Uiso 1 1 calc R . . 
C13 C 0.4478(11) 0.0591(6) 0.7920(5) 0.058(4) Uani 1 1 d . B . 
H13A H 0.4562 0.0095 0.7801 0.070 Uiso 1 1 calc R . . 
H13B H 0.5327 0.0827 0.8209 0.070 Uiso 1 1 calc R . . 
H13C H 0.4340 0.0810 0.7498 0.070 Uiso 1 1 calc R . . 
C14 C 0.4064(13) 0.2149(7) 0.9144(5) 0.055(4) Uani 1 1 d . . . 
C15 C 0.3800(13) 0.1982(6) 0.9870(4) 0.065(4) Uani 1 1 d . B . 
H15A H 0.4263 0.2369 1.0216 0.078 Uiso 1 1 calc R . . 
H15B H 0.4170 0.1549 0.9960 0.078 Uiso 1 1 calc R . . 
H15C H 0.2800 0.1923 0.9893 0.078 Uiso 1 1 calc R . . 
C16 C 0.3808(14) 0.2903(6) 0.9078(5) 0.071(5) Uani 1 1 d . B . 
H16A H 0.4477 0.3227 0.9412 0.085 Uiso 1 1 calc R . . 
H16B H 0.2863 0.2960 0.9168 0.085 Uiso 1 1 calc R . . 
H16C H 0.3920 0.3006 0.8612 0.085 Uiso 1 1 calc R . . 
C17 C 0.5583(12) 0.2096(7) 0.9080(6) 0.082(5) Uani 1 1 d . B . 
H17A H 0.6173 0.2470 0.9398 0.099 Uiso 1 1 calc R . . 
H17B H 0.5750 0.2145 0.8608 0.099 Uiso 1 1 calc R . . 
H17C H 0.5803 0.1640 0.9194 0.099 Uiso 1 1 calc R . . 
C18 C 0.7172(11) 0.2945(6) 0.5902(6) 0.042(3) Uani 1 1 d . . . 
C19 C 0.8151(14) 0.3537(7) 0.5901(6) 0.060(4) Uani 1 1 d . B . 
C20 C 0.8932(13) 0.3568(7) 0.5363(6) 0.070(4) Uani 1 1 d . . . 
H20 H 0.9621 0.3959 0.5371 0.084 Uiso 1 1 calc R B . 
C21 C 0.8723(13) 0.3038(7) 0.4813(5) 0.053(4) Uani 1 1 d . B . 
H21 H 0.9263 0.3061 0.4447 0.064 Uiso 1 1 calc R . . 
C22 C 0.7703(13) 0.2469(6) 0.4809(5) 0.048(3) Uani 1 1 d . . . 
H22 H 0.7530 0.2102 0.4436 0.057 Uiso 1 1 calc R B . 
C23 C 0.6944(12) 0.2445(6) 0.5354(6) 0.045(3) Uani 1 1 d . B . 
C24 C 0.5858(13) 0.1831(6) 0.5312(5) 0.054(4) Uani 1 1 d . B . 
H24A H 0.5109 0.1845 0.4932 0.065 Uiso 1 1 calc R . . 
H24B H 0.6264 0.1392 0.5220 0.065 Uiso 1 1 calc R . . 
C25A C 0.870(3) 0.3925(14) 0.6582(11) 0.057(7) Uani 0.50 1 d PU B . 
H25A H 0.8994 0.4425 0.6548 0.068 Uiso 0.50 1 calc PR . . 
H25B H 0.9504 0.3723 0.6795 0.068 Uiso 0.50 1 calc PR . . 
C26 C 0.4312(13) 0.1240(6) 0.5988(6) 0.067(4) Uani 1 1 d . B . 
H26A H 0.3671 0.1131 0.5557 0.080 Uiso 1 1 calc R . . 
H26B H 0.3788 0.1339 0.6372 0.080 Uiso 1 1 calc R . . 
H26C H 0.4807 0.0839 0.6061 0.080 Uiso 1 1 calc R . . 
C27A C 0.630(3) 0.4520(16) 0.7017(16) 0.073(9) Uiso 0.50 1 d P B . 
C28A C 0.706(3) 0.5277(14) 0.7293(13) 0.049(8) Uiso 0.50 1 d P . . 
H28A H 0.7885 0.5371 0.7062 0.074 Uiso 0.50 1 calc PR B . 
H28B H 0.7350 0.5312 0.7790 0.074 Uiso 0.50 1 calc PR . . 
H28C H 0.6434 0.5622 0.7199 0.074 Uiso 0.50 1 calc PR . . 
C29A C 0.487(3) 0.4384(16) 0.7248(16) 0.080(10) Uiso 0.50 1 d P . . 
H29A H 0.4361 0.3945 0.6994 0.120 Uiso 0.50 1 calc PR B . 
H29B H 0.4345 0.4772 0.7158 0.120 Uiso 0.50 1 calc PR . . 
H29C H 0.4977 0.4346 0.7742 0.120 Uiso 0.50 1 calc PR . . 
C30A C 0.593(3) 0.4488(16) 0.6192(13) 0.097(10) Uiso 0.50 1 d P . . 
H30A H 0.6481 0.4883 0.6037 0.146 Uiso 0.50 1 calc PR B . 
H30B H 0.4943 0.4514 0.6072 0.146 Uiso 0.50 1 calc PR . . 
H30C H 0.6159 0.4047 0.5966 0.146 Uiso 0.50 1 calc PR . . 
C31A C 0.821(2) 0.3863(12) 0.8037(11) 0.032(6) Uiso 0.50 1 d P B . 
C32A C 0.877(3) 0.3187(13) 0.8114(13) 0.051(8) Uiso 0.50 1 d P . . 
H32A H 0.9463 0.3249 0.8525 0.077 Uiso 0.50 1 d PR B . 
H32B H 0.9200 0.3044 0.7708 0.077 Uiso 0.50 1 d PR . . 
H32C H 0.8007 0.2826 0.8159 0.077 Uiso 0.50 1 d PR . . 
C33A C 0.721(3) 0.3969(14) 0.8564(11) 0.072(8) Uiso 0.50 1 d P . . 
H33D H 0.6478 0.3567 0.8495 0.108 Uiso 0.50 1 calc PR B . 
H33E H 0.6799 0.4398 0.8507 0.108 Uiso 0.50 1 calc PR . . 
H33F H 0.7720 0.4010 0.9029 0.108 Uiso 0.50 1 calc PR . . 
C34A C 0.946(4) 0.4439(19) 0.8163(17) 0.047(11) Uiso 0.50 1 d P . . 
H34A H 0.9711 0.4586 0.8659 0.070 Uiso 0.50 1 calc PR B . 
H34B H 0.9226 0.4841 0.7936 0.070 Uiso 0.50 1 calc PR . . 
H34C H 1.0251 0.4259 0.7976 0.070 Uiso 0.50 1 calc PR . . 
C35 C 0.5786(11) 0.3126(6) 0.2997(5) 0.036(3) Uani 1 1 d . . . 
C36 C 0.4737(11) 0.3167(5) 0.3405(5) 0.037(3) Uani 1 1 d . . . 
H36 H 0.3890 0.2859 0.3281 0.045 Uiso 1 1 calc R . . 
C37 C 0.4906(12) 0.3650(6) 0.3988(5) 0.038(3) Uani 1 1 d . . . 
C38 C 0.6091(12) 0.4135(6) 0.4184(5) 0.039(3) Uani 1 1 d . . . 
H38 H 0.6199 0.4462 0.4589 0.046 Uiso 1 1 calc R . . 
C39 C 0.7099(12) 0.4115(6) 0.3759(6) 0.039(3) Uani 1 1 d . . . 
C40 C 0.6959(11) 0.3615(6) 0.3189(5) 0.039(3) Uani 1 1 d . . . 
H40 H 0.7696 0.3608 0.2919 0.046 Uiso 1 1 calc R . . 
C41 C 0.3756(16) 0.3651(9) 0.4413(8) 0.076(5) Uani 1 1 d . . . 
C42 C 0.8339(14) 0.4629(8) 0.3908(8) 0.067(4) Uani 1 1 d . . . 
C43 C 0.4986(12) 0.3056(6) 0.1680(5) 0.037(3) Uani 1 1 d . . . 
C44 C 0.3600(13) 0.3095(6) 0.1486(5) 0.045(3) Uani 1 1 d . . . 
H44 H 0.2924 0.2801 0.1666 0.054 Uiso 1 1 calc R . . 
C45 C 0.3156(15) 0.3556(6) 0.1032(6) 0.055(4) Uani 1 1 d . . . 
C46 C 0.4116(14) 0.3998(6) 0.0765(6) 0.059(4) Uani 1 1 d . . . 
H46 H 0.3832 0.4301 0.0445 0.071 Uiso 1 1 calc R . . 
C47 C 0.5499(14) 0.3978(6) 0.0985(6) 0.053(4) Uani 1 1 d . . . 
C48 C 0.5939(11) 0.3519(6) 0.1411(5) 0.039(3) Uani 1 1 d . . . 
H48 H 0.6906 0.3512 0.1530 0.047 Uiso 1 1 calc R . . 
C49 C 0.1630(17) 0.3530(8) 0.0849(8) 0.074(5) Uani 1 1 d . . . 
C50 C 0.6551(18) 0.4400(9) 0.0639(9) 0.091(5) Uani 1 1 d U . . 
C51 C 0.7043(11) 0.2312(5) 0.2096(5) 0.033(3) Uani 1 1 d . . . 
C52 C 0.7291(12) 0.2108(6) 0.1448(5) 0.045(3) Uani 1 1 d . . . 
H52 H 0.6619 0.2163 0.1076 0.053 Uiso 1 1 calc R . . 
C53 C 0.8468(15) 0.1822(7) 0.1297(6) 0.057(4) Uani 1 1 d . . . 
C54 C 0.9446(13) 0.1728(6) 0.1830(7) 0.057(4) Uani 1 1 d . . . 
H54 H 1.0257 0.1530 0.1739 0.069 Uiso 1 1 calc R . . 
C55 C 0.9235(12) 0.1922(6) 0.2488(6) 0.046(3) Uani 1 1 d . . . 
C56 C 0.8064(11) 0.2196(6) 0.2629(5) 0.043(3) Uani 1 1 d . . . 
H56 H 0.7930 0.2311 0.3094 0.051 Uiso 1 1 calc R . . 
C57 C 0.8658(15) 0.1613(8) 0.0564(10) 0.100(6) Uani 1 1 d DU . . 
C58 C 1.0340(14) 0.1825(8) 0.3058(7) 0.059(4) Uani 1 1 d . . . 
C59 C 0.4554(11) 0.1866(6) 0.2294(5) 0.036(3) Uani 1 1 d . . . 
C60 C 0.3790(10) 0.1468(5) 0.1715(5) 0.030(3) Uani 1 1 d . . . 
H60 H 0.3797 0.1644 0.1286 0.036 Uiso 1 1 calc R . . 
C61 C 0.3012(10) 0.0823(5) 0.1734(4) 0.026(3) Uani 1 1 d . . . 
C62 C 0.2962(11) 0.0554(5) 0.2348(5) 0.037(3) Uani 1 1 d . . . 
H62 H 0.2392 0.0126 0.2369 0.044 Uiso 1 1 calc R . . 
C63 C 0.3767(12) 0.0922(5) 0.2934(5) 0.035(3) Uani 1 1 d . . . 
C64 C 0.4543(11) 0.1556(5) 0.2893(5) 0.034(3) Uani 1 1 d . . . 
H64 H 0.5102 0.1794 0.3299 0.040 Uiso 1 1 calc R . . 
C65 C 0.2249(13) 0.0388(7) 0.1099(5) 0.049(4) Uani 1 1 d . . . 
C66 C 0.3760(15) 0.0654(7) 0.3606(6) 0.055(4) Uani 1 1 d . . . 
C67 C 1.168(4) -0.041(2) 0.5734(16) 0.164(7) Uiso 0.50 1 d PD A 1 
H67A H 1.1296 -0.0794 0.5961 0.245 Uiso 0.50 1 d PR A 1 
H67B H 1.2076 -0.0006 0.6081 0.245 Uiso 0.50 1 d PR A 1 
H67C H 1.2410 -0.0555 0.5475 0.245 Uiso 0.50 1 d PR A 1 
C68 C 1.052(4) -0.019(2) 0.5240(16) 0.164(7) Uiso 0.50 1 d PGD . 1 
C69 C 1.087(3) -0.0174(17) 0.458(2) 0.164(7) Uiso 0.50 1 d PG . 1 
H69 H 1.1743 -0.0300 0.4482 0.196 Uiso 0.50 1 calc PR . 1 
C70 C 0.996(4) 0.0023(15) 0.4067(11) 0.164(7) Uiso 0.50 1 d PG . 1 
H70 H 1.0200 0.0031 0.3617 0.196 Uiso 0.50 1 calc PR . 1 
C71 C 0.869(4) 0.0208(15) 0.4213(15) 0.164(7) Uiso 0.50 1 d PG . 1 
H71 H 0.8060 0.0342 0.3862 0.196 Uiso 0.50 1 calc PR . 1 
C72 C 0.833(3) 0.0196(15) 0.487(2) 0.164(7) Uiso 0.50 1 d PG . 1 
H72 H 0.7465 0.0322 0.4971 0.196 Uiso 0.50 1 calc PR . 1 
C73 C 0.925(4) -0.0001(19) 0.5385(11) 0.164(7) Uiso 0.50 1 d PG . 1 
H73 H 0.9009 -0.0009 0.5836 0.196 Uiso 0.50 1 calc PR . 1 
C25B C 0.791(3) 0.4209(12) 0.6372(11) 0.044(7) Uani 0.50 1 d PU B 2 
H25C H 0.7244 0.4472 0.6130 0.052 Uiso 0.50 1 calc PR B 2 
H25D H 0.8797 0.4523 0.6531 0.052 Uiso 0.50 1 calc PR B 2 
C31B C 0.858(2) 0.3768(12) 0.7736(11) 0.032(6) Uiso 0.50 1 d P B 2 
C32B C 0.815(3) 0.3268(14) 0.8272(12) 0.056(8) Uiso 0.50 1 d P B 2 
H32D H 0.8138 0.2780 0.8075 0.084 Uiso 0.50 1 calc PR B 2 
H32E H 0.7224 0.3339 0.8382 0.084 Uiso 0.50 1 calc PR B 2 
H32F H 0.8822 0.3374 0.8692 0.084 Uiso 0.50 1 calc PR B 2 
C33B C 0.966(2) 0.3448(12) 0.7388(11) 0.063(8) Uiso 0.50 1 d P B 2 
H33A H 0.9985 0.3748 0.7058 0.094 Uiso 0.50 1 calc PR B 2 
H33B H 0.9260 0.2984 0.7145 0.094 Uiso 0.50 1 calc PR B 2 
H33C H 1.0439 0.3399 0.7731 0.094 Uiso 0.50 1 calc PR B 2 
C34B C 0.913(4) 0.454(2) 0.8170(19) 0.070(15) Uiso 0.50 1 d P B 2 
H34D H 0.9713 0.4482 0.8595 0.105 Uiso 0.50 1 calc PR B 2 
H34E H 0.8336 0.4766 0.8282 0.105 Uiso 0.50 1 calc PR B 2 
H34F H 0.9678 0.4821 0.7893 0.105 Uiso 0.50 1 calc PR B 2 
C27B C 0.589(3) 0.4496(14) 0.7361(13) 0.048(7) Uiso 0.50 1 d P B 2 
C28B C 0.649(3) 0.5235(15) 0.7438(13) 0.053(8) Uiso 0.50 1 d P B 2 
H28D H 0.5889 0.5522 0.7678 0.080 Uiso 0.50 1 calc PR B 2 
H28E H 0.6556 0.5380 0.6983 0.080 Uiso 0.50 1 calc PR B 2 
H28F H 0.7413 0.5298 0.7706 0.080 Uiso 0.50 1 calc PR B 2 
C29B C 0.464(3) 0.4354(18) 0.6799(16) 0.098(12) Uiso 0.50 1 d P B 2 
H29D H 0.4006 0.4697 0.6885 0.147 Uiso 0.50 1 calc PR B 2 
H29E H 0.4162 0.3881 0.6799 0.147 Uiso 0.50 1 calc PR B 2 
H29F H 0.4959 0.4393 0.6352 0.147 Uiso 0.50 1 calc PR B 2 
C30B C 0.540(3) 0.4328(15) 0.8054(13) 0.083(9) Uiso 0.50 1 d P B 2 
H30D H 0.6214 0.4345 0.8400 0.125 Uiso 0.50 1 calc PR B 2 
H30E H 0.4865 0.3859 0.7987 0.125 Uiso 0.50 1 calc PR B 2 
H30F H 0.4820 0.4675 0.8209 0.125 Uiso 0.50 1 calc PR B 2 
B1 B 0.5578(12) 0.2577(7) 0.2268(6) 0.032(3) Uani 1 1 d . . . 
 
loop_ 
 _atom_site_aniso_label 
 _atom_site_aniso_U_11 
 _atom_site_aniso_U_22 
 _atom_site_aniso_U_33 
 _atom_site_aniso_U_23 
 _atom_site_aniso_U_13 
 _atom_site_aniso_U_12 
Pd1 0.0342(6) 0.0512(7) 0.0375(5) 0.0134(5) 0.0098(4) 0.0001(5) 
Pd2 0.0367(6) 0.0387(7) 0.0446(5) 0.0042(5) 0.0074(5) 0.0004(5) 
P1 0.0314(19) 0.050(2) 0.0377(17) 0.0059(15) 0.0076(14) -0.0016(17) 
P2 0.056(2) 0.049(2) 0.0378(18) 0.0067(16) 0.0131(16) 0.0030(19) 
F1 0.094(7) 0.176(9) 0.141(8) 0.047(7) 0.069(6) 0.030(7) 
F2 0.129(8) 0.143(8) 0.127(7) 0.057(6) 0.095(6) 0.019(7) 
F3 0.173(9) 0.152(9) 0.206(9) -0.102(8) 0.131(8) -0.053(7) 
F4 0.034(5) 0.069(6) 0.092(5) 0.010(4) 0.001(4) -0.013(4) 
F5 0.064(6) 0.106(7) 0.116(7) -0.052(6) 0.012(5) -0.018(5) 
F6 0.054(6) 0.063(6) 0.193(9) 0.072(6) -0.041(6) -0.040(5) 
F7 0.045(6) 0.149(9) 0.124(8) 0.058(7) 0.006(5) 0.032(6) 
F8 0.077(6) 0.076(7) 0.145(7) 0.032(6) -0.017(5) 0.022(5) 
F9 0.052(6) 0.113(8) 0.139(7) -0.047(6) -0.037(5) 0.014(5) 
F10 0.208(11) 0.118(8) 0.190(9) 0.035(8) 0.086(8) -0.037(8) 
F11 0.153(9) 0.155(9) 0.081(6) 0.036(6) 0.023(6) -0.058(7) 
F12 0.099(7) 0.196(10) 0.230(10) 0.162(8) -0.031(7) -0.054(7) 
F13 0.070(6) 0.154(8) 0.064(5) 0.009(5) 0.019(4) 0.029(6) 
F14 0.344(13) 0.120(8) 0.091(6) -0.055(6) 0.108(7) -0.113(9) 
F15 0.198(10) 0.289(12) 0.132(8) 0.051(8) 0.073(7) 0.169(9) 
F16 0.085(6) 0.086(7) 0.070(5) 0.003(5) -0.004(4) 0.033(5) 
F17 0.030(5) 0.121(8) 0.159(8) 0.007(6) -0.008(5) 0.000(5) 
F18 0.079(6) 0.182(10) 0.063(5) -0.026(5) -0.024(5) 0.080(6) 
F19 0.065(5) 0.062(5) 0.044(4) 0.013(4) -0.006(3) -0.025(4) 
F20 0.064(5) 0.073(6) 0.045(4) 0.008(4) 0.008(4) -0.025(4) 
F21 0.094(7) 0.083(6) 0.062(5) -0.036(4) -0.024(4) 0.048(5) 
F22 0.218(11) 0.057(6) 0.041(4) 0.018(4) -0.015(5) -0.057(6) 
F23 0.078(6) 0.063(5) 0.034(4) 0.005(3) 0.012(4) -0.003(4) 
F24 0.116(8) 0.072(6) 0.060(5) 0.019(4) -0.010(5) 0.040(5) 
O1 0.020(4) 0.068(6) 0.043(4) 0.023(4) 0.000(3) 0.001(4) 
O2 0.031(5) 0.079(7) 0.037(4) 0.017(4) 0.013(4) -0.008(5) 
O3 0.047(5) 0.041(5) 0.051(5) 0.005(4) 0.008(4) -0.007(4) 
C1 0.037(7) 0.048(8) 0.035(7) 0.019(6) 0.018(6) 0.012(6) 
C2 0.039(8) 0.024(7) 0.048(7) -0.001(6) 0.001(6) 0.001(6) 
C3 0.036(8) 0.038(8) 0.061(8) -0.002(6) 0.020(6) -0.017(6) 
C4 0.031(8) 0.038(8) 0.064(8) 0.002(6) 0.002(7) -0.010(6) 
C5 0.034(8) 0.046(9) 0.052(8) 0.006(6) 0.001(6) 0.001(6) 
C6 0.034(8) 0.049(9) 0.042(7) 0.009(6) 0.006(6) -0.007(6) 
C7 0.034(8) 0.062(9) 0.040(7) 0.012(6) 0.010(6) 0.002(7) 
C8 0.040(7) 0.033(7) 0.036(6) 0.004(5) 0.019(5) 0.003(6) 
C9 0.050(9) 0.077(10) 0.048(7) 0.028(7) 0.007(6) 0.004(8) 
C10 0.033(7) 0.034(8) 0.051(7) 0.017(6) 0.012(6) 0.005(6) 
C11 0.062(10) 0.079(11) 0.049(7) 0.041(7) 0.011(7) 0.012(8) 
C12 0.041(8) 0.052(9) 0.056(7) 0.011(6) 0.025(6) 0.017(7) 
C13 0.039(8) 0.094(11) 0.051(7) 0.019(7) 0.018(6) 0.032(8) 
C14 0.052(9) 0.061(10) 0.042(7) 0.013(6) 0.001(6) -0.032(8) 
C15 0.092(11) 0.083(11) 0.011(6) 0.011(6) -0.003(6) -0.022(9) 
C16 0.108(12) 0.054(10) 0.032(7) -0.002(6) 0.004(7) -0.050(9) 
C17 0.050(10) 0.114(13) 0.073(9) 0.056(9) -0.018(8) -0.041(9) 
C18 0.034(8) 0.030(8) 0.059(8) -0.011(6) 0.016(6) -0.001(6) 
C19 0.073(10) 0.059(10) 0.041(8) -0.011(7) 0.025(7) -0.014(8) 
C20 0.061(10) 0.070(11) 0.072(10) 0.007(8) 0.021(8) -0.023(8) 
C21 0.058(10) 0.076(11) 0.034(7) 0.017(7) 0.011(6) 0.025(8) 
C22 0.063(10) 0.038(9) 0.044(8) -0.002(6) 0.011(7) 0.015(7) 
C23 0.037(8) 0.046(9) 0.053(8) 0.015(7) 0.004(6) -0.001(7) 
C24 0.073(10) 0.050(9) 0.041(7) 0.011(6) 0.013(7) 0.010(8) 
C25A 0.061(11) 0.056(11) 0.051(10) 0.003(8) 0.021(9) -0.010(9) 
C26 0.062(10) 0.064(10) 0.067(9) 0.020(7) -0.003(7) -0.019(8) 
C35 0.036(8) 0.034(8) 0.040(7) 0.012(5) -0.001(6) 0.008(6) 
C36 0.027(7) 0.034(8) 0.051(7) 0.004(6) 0.008(6) 0.005(6) 
C37 0.044(8) 0.028(7) 0.045(7) -0.001(6) 0.018(6) 0.007(6) 
C38 0.043(8) 0.033(8) 0.036(7) 0.004(5) 0.002(6) -0.007(6) 
C39 0.041(8) 0.021(7) 0.048(7) 0.000(6) -0.004(6) -0.011(6) 
C40 0.031(7) 0.044(8) 0.039(7) 0.010(6) 0.006(6) -0.005(6) 
C41 0.056(11) 0.076(13) 0.086(12) -0.042(10) 0.044(9) -0.021(10) 
C42 0.038(9) 0.049(11) 0.109(12) -0.008(9) 0.010(9) 0.001(8) 
C43 0.046(8) 0.030(8) 0.032(6) 0.006(5) 0.003(6) 0.000(6) 
C44 0.062(10) 0.026(8) 0.038(7) -0.006(6) 0.002(6) -0.013(7) 
C45 0.072(11) 0.027(8) 0.054(8) -0.001(6) -0.023(8) -0.003(8) 
C46 0.072(11) 0.036(9) 0.063(8) 0.026(7) -0.019(8) -0.006(8) 
C47 0.051(9) 0.050(9) 0.054(8) 0.031(7) -0.002(7) -0.027(7) 
C48 0.028(7) 0.039(8) 0.044(7) 0.012(6) -0.008(6) -0.015(6) 
C49 0.076(14) 0.047(11) 0.087(12) 0.005(9) -0.029(10) 0.003(10) 
C50 0.076(10) 0.095(11) 0.093(10) 0.049(9) -0.033(9) -0.021(9) 
C51 0.039(8) 0.032(7) 0.028(6) -0.003(5) 0.008(5) 0.003(6) 
C52 0.049(9) 0.046(9) 0.040(7) 0.005(6) 0.023(6) -0.003(7) 
C53 0.076(11) 0.064(10) 0.033(8) 0.005(7) 0.020(7) 0.012(8) 
C54 0.051(9) 0.051(9) 0.080(10) 0.012(8) 0.038(8) 0.011(7) 
C55 0.044(9) 0.046(9) 0.044(7) -0.011(6) 0.019(6) -0.002(7) 
C56 0.022(7) 0.061(9) 0.045(7) 0.000(6) 0.010(6) 0.008(6) 
C57 0.082(11) 0.110(12) 0.111(12) 0.026(10) 0.019(10) 0.015(10) 
C58 0.044(10) 0.062(11) 0.069(10) -0.005(8) 0.010(8) 0.016(8) 
C59 0.028(7) 0.028(7) 0.050(7) 0.005(6) 0.008(6) -0.004(6) 
C60 0.031(7) 0.020(7) 0.036(6) 0.003(5) 0.012(5) -0.013(5) 
C61 0.029(7) 0.031(7) 0.020(6) 0.005(5) 0.007(5) 0.006(5) 
C62 0.057(8) 0.021(7) 0.036(7) 0.001(5) 0.017(6) 0.009(6) 
C63 0.058(9) 0.019(7) 0.028(6) 0.006(5) 0.006(6) 0.006(6) 
C64 0.037(8) 0.023(7) 0.039(7) 0.008(5) -0.004(5) 0.000(6) 
C65 0.042(9) 0.072(11) 0.031(8) 0.006(7) 0.008(6) -0.008(8) 
C66 0.073(11) 0.033(9) 0.051(9) -0.002(7) 0.009(8) -0.017(8) 
C25B 0.049(10) 0.039(10) 0.043(10) 0.007(8) 0.011(8) -0.002(8) 
B1 0.026(8) 0.034(9) 0.038(7) -0.003(6) 0.019(6) -0.001(7) 
 
_geom_special_details 
; 
 All esds (except the esd in the dihedral angle between two l.s. planes) 
 are estimated using the full covariance matrix.  The cell esds are taken 
 into account individually in the estimation of esds in distances, angles 
 and torsion angles; correlations between esds in cell parameters are only 
 used when they are defined by crystal symmetry.  An approximate (isotropic) 
 treatment of cell esds is used for estimating esds involving l.s. planes. 
; 
 
loop_ 
 _geom_bond_atom_site_label_1 
 _geom_bond_atom_site_label_2 
 _geom_bond_distance 
 _geom_bond_site_symmetry_2 
 _geom_bond_publ_flag 
Pd1 C1 1.948(11) . ? 
Pd1 O1 2.149(7) . ? 
Pd1 O2 2.180(7) . ? 
Pd1 P1 2.211(3) . ? 
Pd2 C18 1.955(11) . ? 
Pd2 O1 2.113(6) . ? 
Pd2 O3 2.152(7) . ? 
Pd2 P2 2.206(3) . ? 
P1 C8 1.837(10) . ? 
P1 C14 1.849(11) . ? 
P1 C10 1.880(11) . ? 
P2 C27A 1.71(3) . ? 
P2 C31B 1.75(2) . ? 
P2 C25B 1.88(2) . ? 
P2 C25A 1.90(2) . ? 
P2 C31A 1.98(2) . ? 
P2 C27B 2.00(3) . ? 
F1 C41 1.311(16) . ? 
F2 C41 1.308(17) . ? 
F3 C41 1.265(13) . ? 
F4 C42 1.331(14) . ? 
F5 C42 1.376(14) . ? 
F6 C42 1.314(15) . ? 
F7 C49 1.269(17) . ? 
F8 C49 1.346(15) . ? 
F9 C49 1.351(14) . ? 
F10 C50 1.404(18) . ? 
F11 C50 1.194(15) . ? 
F12 C50 1.269(16) . ? 
F13 C57 1.291(13) . ? 
F14 C57 1.255(12) . ? 
F15 C57 1.290(13) . ? 
F16 C58 1.373(14) . ? 
F17 C58 1.285(14) . ? 
F18 C58 1.309(13) . ? 
F19 C65 1.340(12) . ? 
F20 C65 1.327(12) . ? 
F21 C65 1.318(13) . ? 
F22 C66 1.320(12) . ? 
F23 C66 1.351(13) . ? 
F24 C66 1.339(14) . ? 
O1 H1O 0.9602 . ? 
O2 C7 1.399(11) . ? 
O2 C9 1.458(11) . ? 
O3 C24 1.432(11) . ? 
O3 C26 1.446(12) . ? 
C1 C6 1.377(13) . ? 
C1 C2 1.389(13) . ? 
C2 C3 1.405(14) . ? 
C2 C8 1.511(12) . ? 
C3 C4 1.366(13) . ? 
C3 H3 0.9500 . ? 
C4 C5 1.392(14) . ? 
C4 H4 0.9500 . ? 
C5 C6 1.393(14) . ? 
C5 H5 0.9500 . ? 
C6 C7 1.493(13) . ? 
C7 H7A 0.9900 . ? 
C7 H7B 0.9900 . ? 
C8 H8A 0.9900 . ? 
C8 H8B 0.9900 . ? 
C9 H9A 0.9800 . ? 
C9 H9B 0.9800 . ? 
C9 H9C 0.9800 . ? 
C10 C12 1.513(13) . ? 
C10 C11 1.519(12) . ? 
C10 C13 1.556(13) . ? 
C11 H11A 0.9800 . ? 
C11 H11B 0.9800 . ? 
C11 H11C 0.9800 . ? 
C12 H12A 0.9800 . ? 
C12 H12B 0.9800 . ? 
C12 H12C 0.9800 . ? 
C13 H13A 0.9800 . ? 
C13 H13B 0.9800 . ? 
C13 H13C 0.9800 . ? 
C14 C17 1.523(16) . ? 
C14 C16 1.530(16) . ? 
C14 C15 1.552(13) . ? 
C15 H15A 0.9800 . ? 
C15 H15B 0.9800 . ? 
C15 H15C 0.9800 . ? 
C16 H16A 0.9800 . ? 
C16 H16B 0.9800 . ? 
C16 H16C 0.9800 . ? 
C17 H17A 0.9800 . ? 
C17 H17B 0.9800 . ? 
C17 H17C 0.9800 . ? 
C18 C23 1.346(13) . ? 
C18 C19 1.405(15) . ? 
C19 C20 1.385(15) . ? 
C19 C25A 1.47(2) . ? 
C19 C25B 1.57(2) . ? 
C20 C21 1.385(14) . ? 
C20 H20 0.9500 . ? 
C21 C22 1.394(15) . ? 
C21 H21 0.9500 . ? 
C22 C23 1.382(14) . ? 
C22 H22 0.9500 . ? 
C23 C24 1.486(14) . ? 
C24 H24A 0.9900 . ? 
C24 H24B 0.9900 . ? 
C25A H25A 0.9900 . ? 
C25A H25B 0.9900 . ? 
C26 H26A 0.9800 . ? 
C26 H26B 0.9800 . ? 
C26 H26C 0.9800 . ? 
C27A C27B 0.83(3) . ? 
C27A C29A 1.53(4) . ? 
C27A C28A 1.57(4) . ? 
C27A C30A 1.62(3) . ? 
C28A H28A 0.9800 . ? 
C28A H28B 0.9800 . ? 
C28A H28C 0.9800 . ? 
C29A H29A 0.9800 . ? 
C29A H29B 0.9800 . ? 
C29A H29C 0.9800 . ? 
C30A H30A 0.9800 . ? 
C30A H30B 0.9800 . ? 
C30A H30C 0.9800 . ? 
C31A C31B 0.75(3) . ? 
C31A C32A 1.49(3) . ? 
C31A C34A 1.53(4) . ? 
C31A C33A 1.53(3) . ? 
C32A H32A 0.9800 . ? 
C32A H32B 0.9800 . ? 
C32A H32C 0.9800 . ? 
C33A H33D 0.9800 . ? 
C33A H33E 0.9800 . ? 
C33A H33F 0.9800 . ? 
C34A H34A 0.9800 . ? 
C34A H34B 0.9800 . ? 
C34A H34C 0.9800 . ? 
C35 C40 1.383(13) . ? 
C35 C36 1.386(13) . ? 
C35 B1 1.667(14) . ? 
C36 C37 1.379(12) . ? 
C36 H36 0.9500 . ? 
C37 C38 1.387(13) . ? 
C37 C41 1.485(16) . ? 
C38 C39 1.373(14) . ? 
C38 H38 0.9500 . ? 
C39 C40 1.381(13) . ? 
C39 C42 1.452(16) . ? 
C40 H40 0.9500 . ? 
C43 C44 1.379(14) . ? 
C43 C48 1.409(13) . ? 
C43 B1 1.662(15) . ? 
C44 C45 1.405(14) . ? 
C44 H44 0.9500 . ? 
C45 C46 1.388(16) . ? 
C45 C49 1.488(19) . ? 
C46 C47 1.379(16) . ? 
C46 H46 0.9500 . ? 
C47 C48 1.365(14) . ? 
C47 C50 1.514(19) . ? 
C48 H48 0.9500 . ? 
C51 C52 1.356(12) . ? 
C51 C56 1.417(13) . ? 
C51 B1 1.641(15) . ? 
C52 C53 1.389(15) . ? 
C52 H52 0.9500 . ? 
C53 C54 1.379(15) . ? 
C53 C57 1.50(2) . ? 
C54 C55 1.359(14) . ? 
C54 H54 0.9500 . ? 
C55 C56 1.367(14) . ? 
C55 C58 1.510(16) . ? 
C56 H56 0.9500 . ? 
C59 C60 1.384(12) . ? 
C59 C64 1.388(13) . ? 
C59 B1 1.614(15) . ? 
C60 C61 1.391(12) . ? 
C60 H60 0.9500 . ? 
C61 C62 1.379(12) . ? 
C61 C65 1.491(13) . ? 
C62 C63 1.387(12) . ? 
C62 H62 0.9500 . ? 
C63 C64 1.381(13) . ? 
C63 C66 1.481(14) . ? 
C64 H64 0.9500 . ? 
C67 C68 1.539(10) . ? 
C67 H67A 0.9800 . ? 
C67 H67B 0.9800 . ? 
C67 H67C 0.9800 . ? 
C68 C72 1.17(8) 2_756 ? 
C68 C71 1.26(4) 2_756 ? 
C68 C73 1.36(7) 2_756 ? 
C68 C69 1.3900 . ? 
C68 C73 1.3900 . ? 
C68 C70 1.51(8) 2_756 ? 
C68 C68 1.60(4) 2_756 ? 
C68 C69 1.67(8) 2_756 ? 
C69 C70 1.3900 . ? 
C69 H69 0.9500 . ? 
C70 C71 1.3900 . ? 
C70 H70 0.9500 . ? 
C71 C72 1.3900 . ? 
C71 H71 0.9500 . ? 
C72 C73 1.3900 . ? 
C72 H72 0.9500 . ? 
C73 H73 0.9500 . ? 
C25B H25C 0.9900 . ? 
C25B H25D 0.9900 . ? 
C31B C33B 1.49(3) . ? 
C31B C32B 1.58(3) . ? 
C31B C34B 1.63(5) . ? 
C32B H32C 0.8512 . ? 
C32B H32D 0.9800 . ? 
C32B H32E 0.9800 . ? 
C32B H32F 0.9800 . ? 
C33B H32B 1.1449 . ? 
C33B H33A 0.9800 . ? 
C33B H33B 0.9800 . ? 
C33B H33C 0.9800 . ? 
C34B H34D 0.9800 . ? 
C34B H34E 0.9800 . ? 
C34B H34F 0.9800 . ? 
C27B C28B 1.46(3) . ? 
C27B C29B 1.52(4) . ? 
C27B C30B 1.56(3) . ? 
C28B H28D 0.9800 . ? 
C28B H28E 0.9800 . ? 
C28B H28F 0.9800 . ? 
C29B H29D 0.9800 . ? 
C29B H29E 0.9800 . ? 
C29B H29F 0.9800 . ? 
C30B H30D 0.9800 . ? 
C30B H30E 0.9800 . ? 
C30B H30F 0.9800 . ? 
 
loop_ 
 _geom_angle_atom_site_label_1 
 _geom_angle_atom_site_label_2 
 _geom_angle_atom_site_label_3 
 _geom_angle 
 _geom_angle_site_symmetry_1 
 _geom_angle_site_symmetry_3 
 _geom_angle_publ_flag 
C1 Pd1 O1 173.3(4) . . ? 
C1 Pd1 O2 79.2(4) . . ? 
O1 Pd1 O2 94.7(3) . . ? 
C1 Pd1 P1 81.6(3) . . ? 
O1 Pd1 P1 104.49(18) . . ? 
O2 Pd1 P1 160.7(2) . . ? 
C18 Pd2 O1 172.1(4) . . ? 
C18 Pd2 O3 80.4(4) . . ? 
O1 Pd2 O3 91.8(3) . . ? 
C18 Pd2 P2 82.8(3) . . ? 
O1 Pd2 P2 105.1(2) . . ? 
O3 Pd2 P2 163.2(2) . . ? 
C8 P1 C14 105.8(5) . . ? 
C8 P1 C10 105.6(5) . . ? 
C14 P1 C10 113.6(6) . . ? 
C8 P1 Pd1 104.1(3) . . ? 
C14 P1 Pd1 114.1(4) . . ? 
C10 P1 Pd1 112.5(3) . . ? 
C27A P2 C31B 127.3(13) . . ? 
C27A P2 C25B 77.3(13) . . ? 
C31B P2 C25B 108.4(11) . . ? 
C27A P2 C25A 107.6(14) . . ? 
C31B P2 C25A 79.9(11) . . ?  
C27A P2 C31A 112.7(12) . . ?  
C25B P2 C31A 125.1(10) . . ? 
C25A P2 C31A 100.6(10) . . ? 
C31B P2 C27B 116.1(10) . . ? 
C25B P2 C27B 101.6(11) . . ? 
C25A P2 C27B 130.3(12) . . ? 
C31A P2 C27B 96.3(10) . . ? 
C27A P2 Pd2 115.4(10) . . ? 
C31B P2 Pd2 113.4(7) . . ? 
C25B P2 Pd2 104.8(7) . . ? 
C25A P2 Pd2 102.3(7) . . ? 
C31A P2 Pd2 116.0(7) . . ? 
C27B P2 Pd2 111.3(8) . . ? 
Pd2 O1 Pd1 142.2(3) . . ? 
Pd2 O1 H1O 98.4 . . ? 
Pd1 O1 H1O 119.4 . . ? 
C7 O2 C9 114.0(7) . . ? 
C7 O2 Pd1 112.0(6) . . ? 
C9 O2 Pd1 131.9(6) . . ? 
C24 O3 C26 113.8(8) . . ? 
C24 O3 Pd2 112.9(6) . . ? 
C26 O3 Pd2 133.2(7) . . ? 
C6 C1 C2 118.5(10) . . ? 
C6 C1 Pd1 116.2(8) . . ? 
C2 C1 Pd1 125.0(8) . . ? 
C1 C2 C3 121.6(10) . . ? 
C1 C2 C8 116.9(10) . . ? 
C3 C2 C8 121.5(10) . . ? 
C4 C3 C2 119.4(11) . . ? 
C4 C3 H3 120.3 . . ? 
C2 C3 H3 120.3 . . ? 
C3 C4 C5 119.2(11) . . ? 
C3 C4 H4 120.4 . . ? 
C5 C4 H4 120.4 . . ? 
C4 C5 C6 121.3(10) . . ? 
C4 C5 H5 119.3 . . ? 
C6 C5 H5 119.3 . . ? 
C1 C6 C5 119.9(10) . . ? 
C1 C6 C7 119.2(10) . . ? 
C5 C6 C7 120.9(10) . . ? 
O2 C7 C6 108.3(8) . . ? 
O2 C7 H7A 110.0 . . ? 
C6 C7 H7A 110.0 . . ? 
O2 C7 H7B 110.0 . . ? 
C6 C7 H7B 110.0 . . ? 
H7A C7 H7B 108.4 . . ? 
C2 C8 P1 106.0(7) . . ? 
C2 C8 H8A 110.5 . . ? 
P1 C8 H8A 110.5 . . ? 
C2 C8 H8B 110.5 . . ? 
P1 C8 H8B 110.5 . . ? 
H8A C8 H8B 108.7 . . ? 
O2 C9 H9A 109.5 . . ? 
O2 C9 H9B 109.5 . . ? 
H9A C9 H9B 109.5 . . ? 
O2 C9 H9C 109.5 . . ? 
H9A C9 H9C 109.5 . . ? 
H9B C9 H9C 109.5 . . ? 
C12 C10 C11 109.4(9) . . ? 
C12 C10 C13 107.9(9) . . ? 
C11 C10 C13 110.4(9) . . ? 
C12 C10 P1 105.9(7) . . ? 
C11 C10 P1 113.1(7) . . ? 
C13 C10 P1 109.9(8) . . ? 
C10 C11 H11A 109.5 . . ? 
C10 C11 H11B 109.5 . . ? 
H11A C11 H11B 109.5 . . ? 
C10 C11 H11C 109.5 . . ? 
H11A C11 H11C 109.5 . . ? 
H11B C11 H11C 109.5 . . ? 
C10 C12 H12A 109.5 . . ? 
C10 C12 H12B 109.5 . . ? 
H12A C12 H12B 109.5 . . ? 
C10 C12 H12C 109.5 . . ? 
H12A C12 H12C 109.5 . . ? 
H12B C12 H12C 109.5 . . ? 
C10 C13 H13A 109.5 . . ? 
C10 C13 H13B 109.5 . . ? 
H13A C13 H13B 109.5 . . ? 
C10 C13 H13C 109.5 . . ? 
H13A C13 H13C 109.5 . . ? 
H13B C13 H13C 109.5 . . ? 
C17 C14 C16 108.3(10) . . ? 
C17 C14 C15 108.0(10) . . ? 
C16 C14 C15 108.7(10) . . ? 
C17 C14 P1 112.1(9) . . ? 
C16 C14 P1 105.8(8) . . ? 
C15 C14 P1 113.7(8) . . ? 
C14 C15 H15A 109.5 . . ? 
C14 C15 H15B 109.5 . . ? 
H15A C15 H15B 109.5 . . ? 
C14 C15 H15C 109.5 . . ? 
H15A C15 H15C 109.5 . . ? 
H15B C15 H15C 109.5 . . ? 
C14 C16 H16A 109.5 . . ? 
C14 C16 H16B 109.5 . . ? 
H16A C16 H16B 109.5 . . ? 
C14 C16 H16C 109.5 . . ? 
H16A C16 H16C 109.5 . . ? 
H16B C16 H16C 109.5 . . ? 
C14 C17 H17A 109.5 . . ? 
C14 C17 H17B 109.5 . . ? 
H17A C17 H17B 109.5 . . ? 
C14 C17 H17C 109.5 . . ? 
H17A C17 H17C 109.5 . . ? 
H17B C17 H17C 109.5 . . ? 
C23 C18 C19 118.9(11) . . ? 
C23 C18 Pd2 116.3(9) . . ? 
C19 C18 Pd2 124.8(8) . . ? 
C20 C19 C18 119.4(11) . . ? 
C20 C19 C25A 120.1(14) . . ? 
C18 C19 C25A 115.2(13) . . ? 
C20 C19 C25B 122.6(14) . . ? 
C18 C19 C25B 114.7(13) . . ?  
C21 C20 C19 121.1(12) . . ? 
C21 C20 H20 119.5 . . ? 
C19 C20 H20 119.5 . . ? 
C20 C21 C22 118.6(11) . . ? 
C20 C21 H21 120.7 . . ? 
C22 C21 H21 120.7 . . ? 
C23 C22 C21 119.5(11) . . ? 
C23 C22 H22 120.3 . . ? 
C21 C22 H22 120.3 . . ? 
C18 C23 C22 122.4(11) . . ? 
C18 C23 C24 120.8(11) . . ? 
C22 C23 C24 116.7(11) . . ? 
O3 C24 C23 109.1(9) . . ? 
O3 C24 H24A 109.9 . . ? 
C23 C24 H24A 109.9 . . ? 
O3 C24 H24B 109.9 . . ? 
C23 C24 H24B 109.9 . . ? 
H24A C24 H24B 108.3 . . ? 
C19 C25A P2 104.7(14) . . ? 
C19 C25A H25A 110.8 . . ? 
P2 C25A H25A 110.8 . . ? 
C19 C25A H25B 110.8 . . ? 
P2 C25A H25B 110.8 . . ? 
H25A C25A H25B 108.9 . . ? 
O3 C26 H26A 109.5 . . ? 
O3 C26 H26B 109.5 . . ? 
H26A C26 H26B 109.5 . . ? 
O3 C26 H26C 109.5 . . ? 
H26A C26 H26C 109.5 . . ? 
H26B C26 H26C 109.5 . . ?  
C27B C27A C28A 93(4) . . ? 
C29A C27A C28A 113(3) . . ? 
C27B C27A C30A 139(4) . . ? 
C29A C27A C30A 103(2) . . ? 
C28A C27A C30A 107(2) . . ? 
C27B C27A P2 98(4) . . ? 
C29A C27A P2 111(2) . . ? 
C28A C27A P2 119(2) . . ? 
C30A C27A P2 103(2) . . ? 
C27A C28A H28A 109.5 . . ? 
C27A C28A H28B 109.5 . . ? 
H28A C28A H28B 109.5 . . ? 
C27A C28A H28C 109.5 . . ? 
H28A C28A H28C 109.5 . . ? 
H28B C28A H28C 109.5 . . ? 
C27A C29A H29A 109.5 . . ? 
C27A C29A H29B 109.5 . . ? 
H29A C29A H29B 109.5 . . ? 
C27A C29A H29C 109.5 . . ? 
H29A C29A H29C 109.5 . . ? 
H29B C29A H29C 109.5 . . ? 
C27A C30A H30A 109.5 . . ? 
C27A C30A H30B 109.5 . . ? 
H30A C30A H30B 109.5 . . ? 
C27A C30A H30C 109.5 . . ? 
H30A C30A H30C 109.5 . . ? 
H30B C30A H30C 109.5 . . ? 
C31B C31A C32A 71(3) . . ? 
C31B C31A C34A 79(3) . . ? 
C32A C31A C34A 107(2) . . ? 
C31B C31A C33A 169(4) . . ? 
C32A C31A C33A 108(2) . . ? 
C34A C31A C33A 112(2) . . ? 
C31B C31A P2 62(2) . . ? 
C32A C31A P2 109.9(15) . . ? 
C34A C31A P2 111.0(17) . . ? 
C33A C31A P2 109.0(15) . . ? 
C31A C32A H32A 109.5 . . ? 
C31A C32A H32B 109.5 . . ? 
H32A C32A H32B 109.5 . . ? 
C31A C32A H32C 109.5 . . ? 
H32A C32A H32C 109.5 . . ? 
H32B C32A H32C 109.5 . . ? 
C31A C33A H33D 109.5 . . ? 
C31A C33A H33E 109.5 . . ? 
H33D C33A H33E 109.5 . . ? 
C31A C33A H33F 109.5 . . ? 
H33D C33A H33F 109.5 . . ? 
H33E C33A H33F 109.5 . . ? 
C31A C34A H34A 109.5 . . ? 
C31A C34A H34B 109.5 . . ? 
H34A C34A H34B 109.5 . . ? 
C31A C34A H34C 109.5 . . ? 
H34A C34A H34C 109.5 . . ? 
H34B C34A H34C 109.5 . . ? 
C40 C35 C36 116.3(10) . . ? 
C40 C35 B1 121.6(10) . . ? 
C36 C35 B1 121.8(10) . . ? 
C37 C36 C35 120.9(10) . . ? 
C37 C36 H36 119.6 . . ? 
C35 C36 H36 119.6 . . ? 
C36 C37 C38 122.6(10) . . ? 
C36 C37 C41 118.0(11) . . ? 
C38 C37 C41 119.3(10) . . ? 
C39 C38 C37 116.3(10) . . ? 
C39 C38 H38 121.9 . . ? 
C37 C38 H38 121.9 . . ? 
C38 C39 C40 121.3(11) . . ? 
C38 C39 C42 119.6(11) . . ? 
C40 C39 C42 119.0(12) . . ? 
C39 C40 C35 122.5(11) . . ? 
C39 C40 H40 118.7 . . ? 
C35 C40 H40 118.7 . . ? 
F3 C41 F2 106.0(15) . . ? 
F3 C41 F1 103.5(15) . . ? 
F2 C41 F1 100.9(12) . . ? 
F3 C41 C37 116.2(12) . . ? 
F2 C41 C37 114.1(14) . . ? 
F1 C41 C37 114.5(13) . . ? 
F6 C42 F4 105.2(12) . . ? 
F6 C42 F5 104.9(12) . . ? 
F4 C42 F5 102.0(11) . . ? 
F6 C42 C39 114.5(12) . . ? 
F4 C42 C39 115.6(12) . . ? 
F5 C42 C39 113.3(12) . . ? 
C44 C43 C48 116.2(10) . . ? 
C44 C43 B1 124.3(10) . . ? 
C48 C43 B1 119.0(10) . . ? 
C43 C44 C45 122.1(12) . . ? 
C43 C44 H44 118.9 . . ? 
C45 C44 H44 118.9 . . ? 
C46 C45 C44 120.5(13) . . ? 
C46 C45 C49 122.8(13) . . ? 
C44 C45 C49 116.7(13) . . ? 
C47 C46 C45 117.0(11) . . ? 
C47 C46 H46 121.5 . . ? 
C45 C46 H46 121.5 . . ? 
C48 C47 C46 122.7(11) . . ? 
C48 C47 C50 119.3(13) . . ? 
C46 C47 C50 117.2(12) . . ? 
C47 C48 C43 121.3(11) . . ? 
C47 C48 H48 119.4 . . ? 
C43 C48 H48 119.4 . . ? 
F7 C49 F8 105.7(15) . . ? 
F7 C49 F9 109.3(14) . . ? 
F8 C49 F9 99.7(11) . . ? 
F7 C49 C45 118.8(13) . . ? 
F8 C49 C45 111.0(13) . . ? 
F9 C49 C45 110.7(13) . . ? 
F11 C50 F12 115.2(18) . . ? 
F11 C50 F10 100.0(14) . . ? 
F12 C50 F10 94.7(13) . . ? 
F11 C50 C47 121.3(14) . . ? 
F12 C50 C47 114.1(13) . . ? 
F10 C50 C47 105.6(16) . . ? 
C52 C51 C56 115.3(10) . . ? 
C52 C51 B1 123.0(10) . . ? 
C56 C51 B1 121.2(9) . . ? 
C51 C52 C53 123.9(12) . . ? 
C51 C52 H52 118.1 . . ? 
C53 C52 H52 118.1 . . ? 
C54 C53 C52 119.0(11) . . ? 
C54 C53 C57 120.8(13) . . ? 
C52 C53 C57 120.2(12) . . ? 
C55 C54 C53 119.1(12) . . ? 
C55 C54 H54 120.5 . . ? 
C53 C54 H54 120.5 . . ? 
C54 C55 C56 121.2(12) . . ? 
C54 C55 C58 117.7(12) . . ? 
C56 C55 C58 121.1(10) . . ? 
C55 C56 C51 121.5(10) . . ? 
C55 C56 H56 119.2 . . ? 
C51 C56 H56 119.2 . . ? 
F14 C57 F15 112.4(17) . . ? 
F14 C57 F13 104.5(15) . . ? 
F15 C57 F13 101.1(13) . . ? 
F14 C57 C53 111.8(13) . . ? 
F15 C57 C53 112.5(14) . . ? 
F13 C57 C53 113.9(13) . . ? 
F17 C58 F18 111.5(12) . . ? 
F17 C58 F16 104.9(11) . . ? 
F18 C58 F16 102.8(12) . . ? 
F17 C58 C55 114.4(12) . . ? 
F18 C58 C55 112.6(11) . . ? 
F16 C58 C55 109.6(11) . . ? 
C60 C59 C64 114.9(10) . . ? 
C60 C59 B1 123.3(9) . . ? 
C64 C59 B1 121.2(9) . . ? 
C59 C60 C61 122.9(9) . . ? 
C59 C60 H60 118.5 . . ? 
C61 C60 H60 118.5 . . ? 
C62 C61 C60 120.3(9) . . ? 
C62 C61 C65 117.6(10) . . ? 
C60 C61 C65 122.1(9) . . ? 
C61 C62 C63 118.3(10) . . ? 
C61 C62 H62 120.8 . . ? 
C63 C62 H62 120.8 . . ? 
C64 C63 C62 119.7(10) . . ? 
C64 C63 C66 119.8(9) . . ? 
C62 C63 C66 120.5(10) . . ? 
C63 C64 C59 123.7(10) . . ? 
C63 C64 H64 118.1 . . ? 
C59 C64 H64 118.1 . . ? 
F21 C65 F20 105.6(11) . . ? 
F21 C65 F19 106.3(9) . . ? 
F20 C65 F19 104.6(10) . . ? 
F21 C65 C61 113.1(10) . . ? 
F20 C65 C61 113.7(9) . . ? 
F19 C65 C61 112.7(10) . . ? 
F22 C66 F24 107.3(12) . . ? 
F22 C66 F23 106.0(11) . . ? 
F24 C66 F23 105.1(9) . . ? 
F22 C66 C63 113.5(10) . . ? 
F24 C66 C63 112.1(11) . . ? 
F23 C66 C63 112.3(11) . . ? 
C68 C67 H67A 109.5 . . ? 
C68 C67 H67B 109.4 . . ? 
H67A C67 H67B 109.5 . . ? 
C68 C67 H67C 109.5 . . ? 
H67A C67 H67C 109.5 . . ? 
H67B C67 H67C 109.5 . . ? 
C72 C68 C71 70(3) 2_756 2_756 ? 
C72 C68 C73 66(4) 2_756 2_756 ? 
C71 C68 C73 133(6) 2_756 2_756 ? 
C72 C68 C69 58(5) 2_756 . ? 
C71 C68 C69 128(7) 2_756 . ?  
C72 C68 C73 166(5) 2_756 . ? 
C71 C68 C73 111(6) 2_756 . ? 
C73 C68 C73 109(2) 2_756 . ? 
C69 C68 C73 120.0 . . ? 
C72 C68 C70 127(4) 2_756 2_756 ? 
C71 C68 C70 59(3) 2_756 2_756 ? 
C73 C68 C70 150(5) 2_756 2_756 ? 
C69 C68 C70 166(4) . 2_756 ? 
C73 C68 C70 51(4) . 2_756 ? 
C72 C68 C67 56(3) 2_756 . ?  
C73 C68 C67 122(3) 2_756 . ? 
C69 C68 C67 112(3) . . ? 
C73 C68 C67 128(3) . . ? 
C70 C68 C67 78(2) 2_756 . ? 
C72 C68 C68 120(7) 2_756 2_756 ?  
C73 C68 C68 55(3) 2_756 2_756 ? 
C69 C68 C68 67(2) . 2_756 ? 
C73 C68 C68 54(2) . 2_756 ? 
C70 C68 C68 101(6) 2_756 2_756 ? 
C67 C68 C68 169(5) . 2_756 ?  
C71 C68 C69 110(5) 2_756 2_756 ?  
C69 C68 C69 118(2) . 2_756 ?  
C70 C68 C69 52(3) 2_756 2_756 ? 
C67 C68 C69 129(2) . 2_756 ? 
C68 C68 C69 50(3) 2_756 2_756 ? 
C68 C69 C70 120.0 . . ? 
C68 C69 H69 120.0 . . ? 
C70 C69 H69 120.0 . . ? 
C71 C70 C69 120.0 . . ? 
C71 C70 H70 120.0 . . ? 
C69 C70 H70 120.0 . . ? 
C70 C71 C72 120.0 . . ? 
C70 C71 H71 120.0 . . ? 
C72 C71 H71 120.0 . . ? 
C73 C72 C71 120.0 . . ? 
C73 C72 H72 120.0 . . ? 
C71 C72 H72 120.0 . . ? 
C72 C73 C68 120.0 . . ? 
C72 C73 H73 120.0 . . ? 
C68 C73 H73 120.0 . . ? 
C19 C25B P2 102.0(13) . . ? 
C19 C25B H25C 111.4 . . ? 
P2 C25B H25C 111.4 . . ? 
C19 C25B H25D 111.4 . . ? 
P2 C25B H25D 111.4 . . ? 
H25C C25B H25D 109.2 . . ? 
C31A C31B C33B 154(3) . . ? 
C31A C31B C32B 54(3) . . ? 
C33B C31B C32B 106(2) . . ? 
C31A C31B C34B 65(3) . . ? 
C33B C31B C34B 114(2) . . ? 
C32B C31B C34B 107(2) . . ? 
C31A C31B P2 96(3) . . ? 
C33B C31B P2 107.6(15) . . ? 
C32B C31B P2 112.3(16) . . ? 
C34B C31B P2 110.2(18) . . ? 
C31B C32B H32A 92.5 . . ? 
C31B C32B H32C 120.5 . . ? 
H32A C32B H32C 91.8 . . ? 
C31B C32B H32D 109.5 . . ? 
H32A C32B H32D 86.2 . . ?  
C31B C32B H32E 109.5 . . ? 
H32A C32B H32E 145.7 . . ? 
H32C C32B H32E 98.7 . . ? 
H32D C32B H32E 109.5 . . ? 
C31B C32B H32F 109.5 . . ? 
H32C C32B H32F 108.5 . . ? 
H32D C32B H32F 109.5 . . ? 
H32E C32B H32F 109.5 . . ? 
C31B C33B H32B 73.2 . . ? 
C31B C33B H33A 109.5 . . ? 
H32B C33B H33A 171.9 . . ? 
C31B C33B H33B 109.5 . . ? 
H32B C33B H33B 62.6 . . ? 
H33A C33B H33B 109.5 . . ? 
C31B C33B H33C 109.5 . . ? 
H32B C33B H33C 76.0 . . ? 
H33A C33B H33C 109.5 . . ? 
H33B C33B H33C 109.5 . . ? 
C31B C34B H34D 109.5 . . ? 
C31B C34B H34E 109.5 . . ? 
H34D C34B H34E 109.5 . . ? 
C31B C34B H34F 109.5 . . ? 
H34D C34B H34F 109.5 . . ? 
H34E C34B H34F 109.5 . . ? 
C27A C27B C28B 77(3) . . ? 
C27A C27B C29B 80(3) . . ? 
C28B C27B C29B 110(2) . . ? 
C27A C27B C30B 165(4) . . ? 
C28B C27B C30B 109(2) . . ? 
C29B C27B C30B 109(3) . . ? 
C27A C27B P2 58(3) . . ? 
C28B C27B P2 114(2) . . ? 
C29B C27B P2 106.6(18) . . ? 
C30B C27B P2 108.0(18) . . ? 
C27B C28B H28D 109.5 . . ? 
C27B C28B H28E 109.5 . . ? 
H28D C28B H28E 109.5 . . ? 
C27B C28B H28F 109.5 . . ? 
H28D C28B H28F 109.5 . . ? 
H28E C28B H28F 109.5 . . ? 
C27B C29B H29D 109.5 . . ? 
C27B C29B H29E 109.5 . . ? 
H29D C29B H29E 109.5 . . ? 
C27B C29B H29F 109.5 . . ? 
H29D C29B H29F 109.5 . . ? 
H29E C29B H29F 109.5 . . ? 
C27B C30B H30D 109.5 . . ? 
C27B C30B H30E 109.5 . . ? 
H30D C30B H30E 109.5 . . ? 
C27B C30B H30F 109.5 . . ? 
H30D C30B H30F 109.5 . . ? 
H30E C30B H30F 109.5 . . ? 
C59 B1 C51 104.7(9) . . ? 
C59 B1 C43 113.5(9) . . ? 
C51 B1 C43 110.7(9) . . ? 
C59 B1 C35 112.7(9) . . ? 
C51 B1 C35 112.2(9) . . ? 
C43 B1 C35 103.2(8) . . ? 
 
_diffrn_measured_fraction_theta_max    0.929 
_diffrn_reflns_theta_full              25.00 
_diffrn_measured_fraction_theta_full   0.943 
_refine_diff_density_max    1.209 
_refine_diff_density_min   -1.020 
_refine_diff_density_rms    0.120 


#===END

data_(7)

_audit_creation_method                  'WinGX routine CIF_UPDATE'
 
_chemical_name_systematic
;
'(7)'
;
_chemical_name_common                   '[(tBuPCO)u-Pd(u-OH)]2'
_chemical_formula_moiety                'C34 H58 O4 P2 Pd2'
_chemical_formula_sum                   'C34 H58 O4 P2 Pd2'
_chemical_formula_weight                805.54
 
_symmetry_space_group_name_H-M 'P 21/c'
_symmetry_cell_setting 'Monoclinic' 
_symmetry_space_group_name_Hall	'-P 2ybc'
_symmetry_Int_Tables_number        14

loop_
    _symmetry_equiv_pos_as_xyz
'x, y, z'
'-x, y+1/2, -z+1/2'
'-x, -y, -z'
'x, -y-1/2, z-1/2'
 
_cell_length_a                          8.00940(10)
_cell_length_b                          24.7036(4)
_cell_length_c                          8.85420(10)
_cell_angle_alpha                       90
_cell_angle_beta                        97.4150(10)
_cell_angle_gamma                       90
_cell_volume                            1737.25(4)
_cell_formula_units_Z                   2
_cell_measurement_temperature           100(2)
_cell_measurement_reflns_used           234
_cell_measurement_theta_min             3
_cell_measurement_theta_max             20
 
_exptl_crystal_description              'Shape here'
_exptl_crystal_colour                   'Color here'
_exptl_crystal_size_max                 0.23
_exptl_crystal_size_mid                 0.18
_exptl_crystal_size_min                 0.15
_exptl_crystal_density_diffrn           1.54
_exptl_crystal_density_method           'not measured'
_exptl_crystal_F_000                    832
_exptl_special_details
;
 ?
;

_exptl_absorpt_coefficient_mu           1.162
_exptl_absorpt_correction_type          multi-scan
_exptl_absorpt_process_details          '(SADABS; Bruker, 2007)'
_exptl_absorpt_correction_T_min         0.7759
_exptl_absorpt_correction_T_max         0.8449
 
_diffrn_ambient_temperature             100(2)
_diffrn_radiation_wavelength            0.71073
_diffrn_radiation_type                  MoK\a
_diffrn_source                          'fine-focus sealed tube'
_diffrn_radiation_monochromator         graphite
_diffrn_measurement_device_type         'Bruker APEXII CCD area-detector'
_diffrn_measurement_method              '\f and \w scans'
_diffrn_reflns_av_R_equivalents         0.0155
_diffrn_reflns_av_unetI/netI            0.0097
_diffrn_reflns_number                   37081
_diffrn_reflns_limit_h_min              -11
_diffrn_reflns_limit_h_max              11
_diffrn_reflns_limit_k_min              -35
_diffrn_reflns_limit_k_max              35
_diffrn_reflns_limit_l_min              -12
_diffrn_reflns_limit_l_max              12
_diffrn_reflns_theta_min                1.65
_diffrn_reflns_theta_max                30.55
_diffrn_reflns_theta_full               25
_diffrn_measured_fraction_theta_full
                                        0.999
_diffrn_measured_fraction_theta_max
                                        0.999
_reflns_number_total                    5322
_reflns_number_gt                       5103
_reflns_threshold_expression            >2\s(I)
 
_computing_data_collection              'APEX2 (Bruker, 2007)'
_computing_cell_refinement              'SAINT (Bruker, 2007)'
_computing_data_reduction               'SAINT (Bruker, 2007)'
_computing_structure_solution           'SHELXS97 (Sheldrick, 1997)'
_computing_structure_refinement         'SHELXL-97 (Sheldrick, 2008)'
_computing_molecular_graphics           'ORTEP-3 for Windows (Farrugia, 1997)'
_computing_publication_material         'SHELXL-97 (Sheldrick, 1997)'
 
_atom_sites_solution_primary            direct
_atom_sites_solution_secondary          difmap
_atom_sites_solution_hydrogens          geom
 
_refine_special_details
;
 Refinement of F^2^ against ALL reflections.  The weighted R-factor wR and
 goodness of fit S are based on F^2^, conventional R-factors R are based
 on F, with F set to zero for negative F^2^. The threshold expression of
 F^2^ > 2\s(F^2^) is used only for calculating R-factors(gt) etc. and is
 not relevant to the choice of reflections for refinement.  R-factors based
 on F^2^ are statistically about twice as large as those based on F, and R-
 factors based on ALL data will be even larger.
;
_refine_ls_structure_factor_coef        Fsqd
_refine_ls_matrix_type                  full
_refine_ls_weighting_scheme             calc
_refine_ls_weighting_details
         'calc w=1/[\s^2^(Fo^2^)+(0.0264P)^2^+1.0951P] where P=(Fo^2^+2Fc^2^)/3'
_refine_ls_hydrogen_treatment           mixed
_refine_ls_extinction_method            none
_refine_ls_number_reflns                5322
_refine_ls_number_parameters            201
_refine_ls_number_restraints            0
_refine_ls_R_factor_all                 0.0165
_refine_ls_R_factor_gt                  0.0155
_refine_ls_wR_factor_ref                0.0453
_refine_ls_wR_factor_gt                 0.0445
_refine_ls_goodness_of_fit_ref          0.999
_refine_ls_restrained_S_all             0.999
_refine_ls_shift/su_max                 0.005
_refine_ls_shift/su_mean                0
_refine_diff_density_max                0.587
_refine_diff_density_min                -0.532
_refine_diff_density_rms                0.059
 
loop_
    _atom_type_symbol
    _atom_type_description
    _atom_type_scat_dispersion_real
    _atom_type_scat_dispersion_imag
    _atom_type_scat_source
C C 0.0033 0.0016 'International Tables Vol C Tables 4.2.6.8 and 6.1.1.4'
H H 0 0 'International Tables Vol C Tables 4.2.6.8 and 6.1.1.4'
O O 0.0106 0.006 'International Tables Vol C Tables 4.2.6.8 and 6.1.1.4'
P P 0.1023 0.0942 'International Tables Vol C Tables 4.2.6.8 and 6.1.1.4'
Pd Pd -0.9988 1.0072 'International Tables Vol C Tables 4.2.6.8 and 6.1.1.4'
 
loop_
    _atom_site_label
    _atom_site_type_symbol
    _atom_site_fract_x
    _atom_site_fract_y
    _atom_site_fract_z
    _atom_site_U_iso_or_equiv
    _atom_site_adp_type
    _atom_site_occupancy
    _atom_site_symmetry_multiplicity
    _atom_site_calc_flag
    _atom_site_refinement_flags
    _atom_site_disorder_assembly
    _atom_site_disorder_group
C8 C 0.40765(14) 0.68856(4) 0.00932(12) 0.01224(18) Uani 1 1 d . . .
H8A H 0.4693 0.6982 -0.0769 0.015 Uiso 1 1 calc R . .
H8B H 0.3338 0.7192 0.0288 0.015 Uiso 1 1 calc R . .
C10 C 0.00571(15) 0.57662(5) 0.06366(14) 0.0171(2) Uani 1 1 d . . .
H10A H 0.0868 0.5487 0.1029 0.026 Uiso 1 1 calc R . .
H10B H -0.0397 0.5681 -0.0418 0.026 Uiso 1 1 calc R . .
H10C H -0.0864 0.5779 0.1265 0.026 Uiso 1 1 calc R . .
C11 C 0.15715(15) 0.64489(5) 0.23689(13) 0.0173(2) Uani 1 1 d . . .
H11A H 0.2387 0.6174 0.278 0.026 Uiso 1 1 calc R . .
H11B H 0.0616 0.645 0.2958 0.026 Uiso 1 1 calc R . .
H11C H 0.2111 0.6806 0.2438 0.026 Uiso 1 1 calc R . .
C1 C 0.56253(13) 0.62127(4) 0.18838(12) 0.01028(17) Uani 1 1 d . . .
C2 C 0.52918(13) 0.67629(4) 0.14915(12) 0.01103(18) Uani 1 1 d . . .
C3 C 0.60012(14) 0.71880(4) 0.23882(13) 0.01391(19) Uani 1 1 d . . .
H3 H 0.5785 0.7552 0.2072 0.017 Uiso 1 1 calc R . .
C4 C 0.70232(15) 0.70809(5) 0.37431(14) 0.0160(2) Uani 1 1 d . . .
H4 H 0.752 0.7369 0.4355 0.019 Uiso 1 1 calc R . .
C5 C 0.73086(14) 0.65479(5) 0.41914(13) 0.0153(2) Uani 1 1 d . . .
H5 H 0.7983 0.6474 0.5132 0.018 Uiso 1 1 calc R . .
C6 C 0.66267(13) 0.61149(4) 0.32904(12) 0.01156(18) Uani 1 1 d . . .
C7 C 0.70008(15) 0.55555(4) 0.39294(13) 0.01367(19) Uani 1 1 d . . .
H7A H 0.6186 0.5292 0.3413 0.016 Uiso 1 1 calc R . .
H7B H 0.8148 0.5444 0.3757 0.016 Uiso 1 1 calc R . .
C9 C 0.09425(14) 0.63192(4) 0.06888(13) 0.01238(18) Uani 1 1 d . . .
C12 C -0.03186(15) 0.67573(5) 0.00712(15) 0.0188(2) Uani 1 1 d . . .
H12A H 0.027 0.7103 0.002 0.028 Uiso 1 1 calc R . .
H12B H -0.1188 0.6793 0.0749 0.028 Uiso 1 1 calc R . .
H12C H -0.0845 0.6656 -0.095 0.028 Uiso 1 1 calc R . .
C13 C 0.22783(14) 0.62963(4) -0.24619(12) 0.01266(19) Uani 1 1 d . . .
C14 C 0.39092(15) 0.61502(5) -0.31208(13) 0.0172(2) Uani 1 1 d . . .
H14A H 0.4814 0.6395 -0.27 0.026 Uiso 1 1 calc R . .
H14B H 0.3725 0.6187 -0.4232 0.026 Uiso 1 1 calc R . .
H14C H 0.4226 0.5776 -0.285 0.026 Uiso 1 1 calc R . .
C15 C 0.09300(15) 0.58777(5) -0.30258(13) 0.0170(2) Uani 1 1 d . . .
H15A H 0.1276 0.5521 -0.2616 0.025 Uiso 1 1 calc R . .
H15B H 0.0793 0.5865 -0.4141 0.025 Uiso 1 1 calc R . .
H15C H -0.0141 0.598 -0.2681 0.025 Uiso 1 1 calc R . .
C16 C 0.17019(16) 0.68622(5) -0.30427(13) 0.0174(2) Uani 1 1 d . . .
H16A H 0.2579 0.7128 -0.2702 0.026 Uiso 1 1 calc R . .
H16B H 0.066 0.696 -0.2637 0.026 Uiso 1 1 calc R . .
H16C H 0.15 0.6859 -0.4158 0.026 Uiso 1 1 calc R . .
C17 C 0.72618(17) 0.50552(5) 0.61925(14) 0.0199(2) Uani 1 1 d . . .
H17A H 0.6541 0.4778 0.565 0.03 Uiso 1 1 calc R . .
H17B H 0.7067 0.5065 0.7262 0.03 Uiso 1 1 calc R . .
H17C H 0.8445 0.4968 0.6133 0.03 Uiso 1 1 calc R . .
O1 O 0.68771(12) 0.55650(3) 0.55187(10) 0.01687(16) Uani 1 1 d . . .
O2 O 0.35927(11) 0.49917(3) -0.09675(9) 0.01219(14) Uani 1 1 d . . .
H2 H 0.277(3) 0.4900(9) -0.075(2) 0.040(6) Uiso 1 1 d . . .
P1 P 0.28304(3) 0.627182(10) -0.03435(3) 0.00885(5) Uani 1 1 d . . .
Pd1 Pd 0.460845(9) 0.562335(3) 0.047159(8) 0.00812(3) Uani 1 1 d . . .
 
loop_
    _atom_site_aniso_label
    _atom_site_aniso_U_11
    _atom_site_aniso_U_22
    _atom_site_aniso_U_33
    _atom_site_aniso_U_23
    _atom_site_aniso_U_13
    _atom_site_aniso_U_12
C8 0.0139(5) 0.0085(4) 0.0141(4) 0.0003(3) 0.0007(4) -0.0009(3)
C10 0.0150(5) 0.0159(5) 0.0213(5) 0.0018(4) 0.0056(4) -0.0029(4)
C11 0.0180(5) 0.0203(5) 0.0146(5) -0.0020(4) 0.0058(4) 0.0002(4)
C1 0.0098(4) 0.0094(4) 0.0118(4) -0.0017(3) 0.0019(3) -0.0007(3)
C2 0.0107(4) 0.0101(4) 0.0126(4) -0.0011(3) 0.0025(3) -0.0002(3)
C3 0.0138(5) 0.0098(4) 0.0184(5) -0.0028(4) 0.0030(4) -0.0010(4)
C4 0.0154(5) 0.0130(5) 0.0190(5) -0.0058(4) 0.0003(4) -0.0027(4)
C5 0.0136(5) 0.0164(5) 0.0150(5) -0.0030(4) -0.0014(4) -0.0001(4)
C6 0.0103(4) 0.0117(4) 0.0127(4) -0.0014(3) 0.0016(3) 0.0005(3)
C7 0.0160(5) 0.0136(5) 0.0112(5) -0.0006(4) 0.0008(4) 0.0021(4)
C9 0.0110(4) 0.0111(4) 0.0156(5) 0.0005(3) 0.0038(4) 0.0013(3)
C12 0.0143(5) 0.0174(5) 0.0254(6) 0.0032(4) 0.0051(4) 0.0057(4)
C13 0.0151(5) 0.0115(4) 0.0111(4) 0.0009(3) 0.0006(4) 0.0015(4)
C14 0.0194(5) 0.0199(5) 0.0132(5) -0.0003(4) 0.0052(4) 0.0021(4)
C15 0.0182(5) 0.0153(5) 0.0158(5) -0.0007(4) -0.0043(4) -0.0008(4)
C16 0.0220(5) 0.0143(5) 0.0154(5) 0.0043(4) 0.0002(4) 0.0025(4)
C17 0.0232(6) 0.0202(6) 0.0160(5) 0.0045(4) 0.0012(4) 0.0003(4)
O1 0.0223(4) 0.0170(4) 0.0116(4) 0.0009(3) 0.0030(3) 0.0027(3)
O2 0.0114(3) 0.0083(3) 0.0161(4) -0.0022(3) -0.0014(3) 0.0013(3)
P1 0.00922(11) 0.00719(11) 0.01015(11) 0.00024(8) 0.00132(9) 0.00074(8)
Pd1 0.00832(4) 0.00632(4) 0.00952(4) -0.00053(2) 0.00038(3) 0.00046(2)
 
_geom_special_details
;
 All s.u.'s (except the s.u. in the dihedral angle between two l.s. planes)
 are estimated using the full covariance matrix.  The cell s.u.'s are taken
 into account individually in the estimation of s.u.'s in distances, angles
 and torsion angles; correlations between s.u.'s in cell parameters are only
 used when they are defined by crystal symmetry.  An approximate (isotropic)
 treatment of cell s.u.'s is used for estimating s.u.'s involving l.s. planes.
;

loop_
    _geom_bond_atom_site_label_1
    _geom_bond_atom_site_label_2
    _geom_bond_distance
    _geom_bond_site_symmetry_2
    _geom_bond_publ_flag
C8 C2 1.5037(15) . ?
C8 P1 1.8289(11) . ?
C8 H8A 0.99 . ?
C8 H8B 0.99 . ?
C10 C9 1.5373(16) . ?
C10 H10A 0.98 . ?
C10 H10B 0.98 . ?
C10 H10C 0.98 . ?
C11 C9 1.5414(16) . ?
C11 H11A 0.98 . ?
C11 H11B 0.98 . ?
C11 H11C 0.98 . ?
C1 C6 1.4125(15) . ?
C1 C2 1.4196(14) . ?
C1 Pd1 2.0208(10) . ?
C2 C3 1.3927(15) . ?
C3 C4 1.3877(16) . ?
C3 H3 0.95 . ?
C4 C5 1.3858(16) . ?
C4 H4 0.95 . ?
C5 C6 1.4023(15) . ?
C5 H5 0.95 . ?
C6 C7 1.5084(15) . ?
C7 O1 1.4235(14) . ?
C7 H7A 0.99 . ?
C7 H7B 0.99 . ?
C9 C12 1.5324(16) . ?
C9 P1 1.8688(11) . ?
C12 H12A 0.98 . ?
C12 H12B 0.98 . ?
C12 H12C 0.98 . ?
C13 C15 1.5316(16) . ?
C13 C16 1.5396(15) . ?
C13 C14 1.5407(16) . ?
C13 P1 1.8717(11) . ?
C14 H14A 0.98 . ?
C14 H14B 0.98 . ?
C14 H14C 0.98 . ?
C15 H15A 0.98 . ?
C15 H15B 0.98 . ?
C15 H15C 0.98 . ?
C16 H16A 0.98 . ?
C16 H16B 0.98 . ?
C16 H16C 0.98 . ?
C17 O1 1.4106(14) . ?
C17 H17A 0.98 . ?
C17 H17B 0.98 . ?
C17 H17C 0.98 . ?
O2 Pd1 2.1009(8) 3_665 ?
O2 Pd1 2.1101(8) . ?
O2 H2 0.75(2) . ?
P1 Pd1 2.2023(3) . ?
Pd1 O2 2.1009(8) 3_665 ?
 
loop_
    _geom_angle_atom_site_label_1
    _geom_angle_atom_site_label_2
    _geom_angle_atom_site_label_3
    _geom_angle
    _geom_angle_site_symmetry_1
    _geom_angle_site_symmetry_3
    _geom_angle_publ_flag
C2 C8 P1 106.54(7) . . ?
C2 C8 H8A 110.4 . . ?
P1 C8 H8A 110.4 . . ?
C2 C8 H8B 110.4 . . ?
P1 C8 H8B 110.4 . . ?
H8A C8 H8B 108.6 . . ?
C9 C10 H10A 109.5 . . ?
C9 C10 H10B 109.5 . . ?
H10A C10 H10B 109.5 . . ?
C9 C10 H10C 109.5 . . ?
H10A C10 H10C 109.5 . . ?
H10B C10 H10C 109.5 . . ?
C9 C11 H11A 109.5 . . ?
C9 C11 H11B 109.5 . . ?
H11A C11 H11B 109.5 . . ?
C9 C11 H11C 109.5 . . ?
H11A C11 H11C 109.5 . . ?
H11B C11 H11C 109.5 . . ?
C6 C1 C2 116.56(9) . . ?
C6 C1 Pd1 124.05(8) . . ?
C2 C1 Pd1 119.36(8) . . ?
C3 C2 C1 122.17(10) . . ?
C3 C2 C8 119.38(10) . . ?
C1 C2 C8 118.40(9) . . ?
C4 C3 C2 120.05(10) . . ?
C4 C3 H3 120 . . ?
C2 C3 H3 120 . . ?
C5 C4 C3 119.07(10) . . ?
C5 C4 H4 120.5 . . ?
C3 C4 H4 120.5 . . ?
C4 C5 C6 121.61(10) . . ?
C4 C5 H5 119.2 . . ?
C6 C5 H5 119.2 . . ?
C5 C6 C1 120.41(10) . . ?
C5 C6 C7 116.19(10) . . ?
C1 C6 C7 123.38(9) . . ?
O1 C7 C6 108.66(9) . . ?
O1 C7 H7A 110 . . ?
C6 C7 H7A 110 . . ?
O1 C7 H7B 110 . . ?
C6 C7 H7B 110 . . ?
H7A C7 H7B 108.3 . . ?
C12 C9 C10 109.67(10) . . ?
C12 C9 C11 108.42(9) . . ?
C10 C9 C11 107.80(9) . . ?
C12 C9 P1 114.04(8) . . ?
C10 C9 P1 109.20(8) . . ?
C11 C9 P1 107.50(8) . . ?
C9 C12 H12A 109.5 . . ?
C9 C12 H12B 109.5 . . ?
H12A C12 H12B 109.5 . . ?
C9 C12 H12C 109.5 . . ?
H12A C12 H12C 109.5 . . ?
H12B C12 H12C 109.5 . . ?
C15 C13 C16 109.62(9) . . ?
C15 C13 C14 108.36(9) . . ?
C16 C13 C14 108.57(9) . . ?
C15 C13 P1 111.74(8) . . ?
C16 C13 P1 112.70(8) . . ?
C14 C13 P1 105.65(7) . . ?
C13 C14 H14A 109.5 . . ?
C13 C14 H14B 109.5 . . ?
H14A C14 H14B 109.5 . . ?
C13 C14 H14C 109.5 . . ?
H14A C14 H14C 109.5 . . ?
H14B C14 H14C 109.5 . . ?
C13 C15 H15A 109.5 . . ?
C13 C15 H15B 109.5 . . ?
H15A C15 H15B 109.5 . . ?
C13 C15 H15C 109.5 . . ?
H15A C15 H15C 109.5 . . ?
H15B C15 H15C 109.5 . . ?
C13 C16 H16A 109.5 . . ?
C13 C16 H16B 109.5 . . ?
H16A C16 H16B 109.5 . . ?
C13 C16 H16C 109.5 . . ?
H16A C16 H16C 109.5 . . ?
H16B C16 H16C 109.5 . . ?
O1 C17 H17A 109.5 . . ?
O1 C17 H17B 109.5 . . ?
H17A C17 H17B 109.5 . . ?
O1 C17 H17C 109.5 . . ?
H17A C17 H17C 109.5 . . ?
H17B C17 H17C 109.5 . . ?
C17 O1 C7 111.35(9) . . ?
Pd1 O2 Pd1 102.01(3) 3_665 . ?
Pd1 O2 H2 109.3(17) 3_665 . ?
Pd1 O2 H2 110.7(17) . . ?
C8 P1 C9 107.37(5) . . ?
C8 P1 C13 103.71(5) . . ?
C9 P1 C13 112.75(5) . . ?
C8 P1 Pd1 102.80(4) . . ?
C9 P1 Pd1 114.53(4) . . ?
C13 P1 Pd1 114.27(4) . . ?
C1 Pd1 O2 100.43(4) . 3_665 ?
C1 Pd1 O2 178.36(4) . . ?
O2 Pd1 O2 77.99(3) 3_665 . ?
C1 Pd1 P1 82.57(3) . . ?
O2 Pd1 P1 172.56(2) 3_665 . ?
O2 Pd1 P1 99.06(2) . . ?
 

#===END


data_(8)

_audit_creation_method                  'WinGX routine CIF_UPDATE'
 
_chemical_name_systematic
;
'(8)'
;
_chemical_name_common                   '(tBuPCO)PdO(CO)OH'
_chemical_formula_moiety                'C18 H29 O4 P Pd, 1.5(C6 D6)'
_chemical_formula_sum                   'C27 H29 D9 O4 P Pd'
_chemical_formula_weight                573
 
_symmetry_cell_setting                  monoclinic
_symmetry_space_group_name_H-M          'P 1 21/c 1'
_symmetry_space_group_name_Hall         '-P 2ybc'
_symmetry_Int_Tables_number             14

loop_
    _symmetry_equiv_pos_as_xyz
'x, y, z'
'-x, y+1/2, -z+1/2'
'-x, -y, -z'
'x, -y-1/2, z-1/2'
 
_cell_length_a                          9.6066(2)
_cell_length_b                          10.5079(2)
_cell_length_c                          25.9114(5)
_cell_angle_alpha                       90
_cell_angle_beta                        94.3110(10)
_cell_angle_gamma                       90
_cell_volume                            2608.23(9)
_cell_formula_units_Z                   4
_cell_measurement_temperature           110(2)
_cell_measurement_reflns_used           350
_cell_measurement_theta_min             3
_cell_measurement_theta_max             20
 
_exptl_crystal_description              prism
_exptl_crystal_colour                   colorless
_exptl_crystal_size_max                 0.3
_exptl_crystal_size_mid                 0.23
_exptl_crystal_size_min                 0.14
_exptl_crystal_density_diffrn           1.459
_exptl_crystal_density_method           'not measured'
_exptl_crystal_F_000                    1172
_exptl_special_details
;
 ?
;
 
_exptl_absorpt_coefficient_mu           0.803
_exptl_absorpt_correction_type          multi-scan
_exptl_absorpt_process_details          '(SADABS; Bruker, 2007)'
_exptl_absorpt_correction_T_min         0.7947
_exptl_absorpt_correction_T_max         0.8959
 
_diffrn_ambient_temperature             110(2)
_diffrn_radiation_wavelength            0.71073
_diffrn_radiation_type                  MoK\a
_diffrn_source                          'fine-focus sealed tube'
_diffrn_radiation_monochromator         graphite
_diffrn_measurement_device_type         'Bruker APEXII CCD area-detector'
_diffrn_measurement_method              '\f and \w scans'
_diffrn_reflns_av_R_equivalents         0.0252
_diffrn_reflns_av_unetI/netI            0.0154
_diffrn_reflns_number                   70254
_diffrn_reflns_limit_h_min              -14
_diffrn_reflns_limit_h_max              14
_diffrn_reflns_limit_k_min              -16
_diffrn_reflns_limit_k_max              16
_diffrn_reflns_limit_l_min              -39
_diffrn_reflns_limit_l_max              39
_diffrn_reflns_theta_min                1.58
_diffrn_reflns_theta_max                33.19
_diffrn_reflns_theta_full               25
_diffrn_measured_fraction_theta_full
                                        1
_diffrn_measured_fraction_theta_max
                                        1
_reflns_number_total                    9975
_reflns_number_gt                       9216
_reflns_threshold_expression            >2\s(I)
 
_computing_data_collection              'APEX2 (Bruker, 2007)'
_computing_cell_refinement              'SAINT (Bruker, 2007)'
_computing_data_reduction               'SAINT (Bruker, 2007)'
_computing_structure_solution           'SHELXS97 (Sheldrick, 1997)'
_computing_structure_refinement         'SHELXL-97 (Sheldrick, 2008)'
_computing_molecular_graphics           'ORTEP-3 for Windows (Farrugia, 1997)'
_computing_publication_material         'SHELXL-97 (Sheldrick, 1997)'
 
_atom_sites_solution_primary            direct
_atom_sites_solution_secondary          difmap
_atom_sites_solution_hydrogens          geom
 
_refine_special_details
;
 Refinement of F^2^ against ALL reflections.  The weighted R-factor wR and
 goodness of fit S are based on F^2^, conventional R-factors R are based
 on F, with F set to zero for negative F^2^. The threshold expression of
 F^2^ > 2\s(F^2^) is used only for calculating R-factors(gt) etc. and is
 not relevant to the choice of reflections for refinement.  R-factors based
 on F^2^ are statistically about twice as large as those based on F, and R-
 factors based on ALL data will be even larger.
;
_refine_ls_structure_factor_coef        Fsqd
_refine_ls_matrix_type                  full
_refine_ls_weighting_scheme             calc
_refine_ls_weighting_details
         'calc w=1/[\s^2^(Fo^2^)+(0.0177P)^2^+1.4083P] where P=(Fo^2^+2Fc^2^)/3'
_refine_ls_hydrogen_treatment           mixed
_refine_ls_extinction_method            none
_refine_ls_number_reflns                9975
_refine_ls_number_parameters            298
_refine_ls_number_restraints            0
_refine_ls_R_factor_all                 0.0235
_refine_ls_R_factor_gt                  0.0204
_refine_ls_wR_factor_ref                0.0499
_refine_ls_wR_factor_gt                 0.0484
_refine_ls_goodness_of_fit_ref          1.106
_refine_ls_restrained_S_all             1.106
_refine_ls_shift/su_max                 0.006
_refine_ls_shift/su_mean                0
_refine_diff_density_max                0.473
_refine_diff_density_min                -0.582
_refine_diff_density_rms                0.063
 
loop_
    _atom_type_symbol
    _atom_type_description
    _atom_type_scat_dispersion_real
    _atom_type_scat_dispersion_imag
    _atom_type_scat_source
C C 0.0033 0 'International Tables Vol C Tables 4.2.6.8 and 6.1.1.4'
H H 0 0 'International Tables Vol C Tables 4.2.6.8 and 6.1.1.4'
O O 0.0106 0 'International Tables Vol C Tables 4.2.6.8 and 6.1.1.4'
P P 0.1023 0 'International Tables Vol C Tables 4.2.6.8 and 6.1.1.4'
Pd Pd -0.9988 0 'International Tables Vol C Tables 4.2.6.8 and 6.1.1.4'
D D 0 0 'International Tables Vol C Tables 4.2.6.8 and 6.1.1.4'
 
loop_
    _atom_site_label
    _atom_site_type_symbol
    _atom_site_fract_x
    _atom_site_fract_y
    _atom_site_fract_z
    _atom_site_U_iso_or_equiv
    _atom_site_adp_type
    _atom_site_occupancy
    _atom_site_symmetry_multiplicity
    _atom_site_calc_flag
    _atom_site_refinement_flags
    _atom_site_disorder_assembly
    _atom_site_disorder_group
C1 C 0.45318(10) 1.12673(9) 0.12058(4) 0.01242(16) Uani 1 1 d . . .
C2 C 0.32754(10) 1.05902(10) 0.12147(4) 0.01355(16) Uani 1 1 d . . .
C3 C 0.20648(11) 1.12047(11) 0.13463(4) 0.01671(18) Uani 1 1 d . . .
H3 H 0.12333 1.07539 0.13531 0.02 Uiso 1 1 d R . .
C4 C 0.21062(11) 1.24967(11) 0.14675(4) 0.01851(19) Uani 1 1 d . . .
H4 H 0.13066 1.29011 0.15658 0.022 Uiso 1 1 d R . .
C5 C 0.33352(11) 1.31852(10) 0.14424(4) 0.01722(18) Uani 1 1 d . . .
H5 H 0.33494 1.40514 0.15162 0.021 Uiso 1 1 d R . .
C6 C 0.45492(11) 1.25783(10) 0.13064(4) 0.01410(17) Uani 1 1 d . . .
C7 C 0.58500(12) 1.33259(10) 0.12393(5) 0.01820(19) Uani 1 1 d . . .
H7A H 0.56986 1.3897 0.09463 0.022 Uiso 1 1 d R . .
H7B H 0.60847 1.3834 0.15461 0.022 Uiso 1 1 d R . .
C8 C 0.33150(10) 0.92067(10) 0.10655(4) 0.01506(17) Uani 1 1 d . . .
H8A H 0.29574 0.90936 0.07084 0.018 Uiso 1 1 d R . .
H8B H 0.27524 0.8704 0.1285 0.018 Uiso 1 1 d R . .
C9 C 0.54161(11) 0.80557(10) 0.18220(4) 0.01435(17) Uani 1 1 d . . .
C10 C 0.48678(13) 0.90625(12) 0.21866(4) 0.0208(2) Uani 1 1 d . . .
H10A H 0.38847 0.9182 0.21061 0.031 Uiso 1 1 d R . .
H10B H 0.53465 0.98527 0.21429 0.031 Uiso 1 1 d R . .
H10C H 0.503 0.87814 0.25385 0.031 Uiso 1 1 d R . .
C11 C 0.46275(13) 0.68090(11) 0.18923(5) 0.0212(2) Uani 1 1 d . . .
H11A H 0.47059 0.65724 0.22511 0.032 Uiso 1 1 d R . .
H11B H 0.50208 0.61509 0.16914 0.032 Uiso 1 1 d R . .
H11C H 0.36612 0.69219 0.17784 0.032 Uiso 1 1 d R . .
C12 C 0.69783(12) 0.78650(12) 0.19736(4) 0.0205(2) Uani 1 1 d . . .
H12A H 0.71118 0.76792 0.23367 0.031 Uiso 1 1 d R . .
H12B H 0.74775 0.8627 0.18996 0.031 Uiso 1 1 d R . .
H12C H 0.73222 0.71697 0.17793 0.031 Uiso 1 1 d R . .
C13 C 0.53998(11) 0.75033(10) 0.06398(4) 0.01486(17) Uani 1 1 d . . .
C14 C 0.41697(12) 0.65692(11) 0.05752(5) 0.0214(2) Uani 1 1 d . . .
H14A H 0.43327 0.59681 0.03073 0.032 Uiso 1 1 d R . .
H14B H 0.33251 0.70308 0.0483 0.032 Uiso 1 1 d R . .
H14C H 0.40824 0.61248 0.08948 0.032 Uiso 1 1 d R . .
C15 C 0.67710(12) 0.67753(11) 0.07520(5) 0.0195(2) Uani 1 1 d . . .
H15A H 0.66981 0.62349 0.10474 0.029 Uiso 1 1 d R . .
H15B H 0.75208 0.73694 0.08216 0.029 Uiso 1 1 d R . .
H15C H 0.69533 0.62655 0.04571 0.029 Uiso 1 1 d R . .
C16 C 0.54708(14) 0.82399(12) 0.01295(4) 0.0220(2) Uani 1 1 d . . .
H16A H 0.62498 0.88143 0.01588 0.033 Uiso 1 1 d R . .
H16B H 0.46237 0.87141 0.00589 0.033 Uiso 1 1 d R . .
H16C H 0.55833 0.76512 -0.01476 0.033 Uiso 1 1 d R . .
C17 C 0.81289(13) 1.30791(12) 0.09377(5) 0.0226(2) Uani 1 1 d . . .
H17A H 0.78395 1.33949 0.05988 0.034 Uiso 1 1 d R . .
H17B H 0.887 1.24743 0.09131 0.034 Uiso 1 1 d R . .
H17C H 0.84527 1.37739 0.11554 0.034 Uiso 1 1 d R . .
C18 C 0.89560(10) 0.98390(10) 0.06046(4) 0.01364(16) Uani 1 1 d . . .
C19 C 0.04615(13) 0.73631(14) 0.16984(5) 0.0267(3) Uani 1 1 d . . .
D19 D 0.0143 0.7698 0.1379 0.032 Uiso 1 1 d R . .
C20 C 0.05919(14) 0.60573(14) 0.17625(5) 0.0270(3) Uani 1 1 d . . .
D20 D 0.0365 0.5515 0.1485 0.032 Uiso 1 1 d R . .
C21 C 0.10596(15) 0.55589(13) 0.22397(5) 0.0268(2) Uani 1 1 d . . .
D21 D 0.1152 0.4683 0.2281 0.032 Uiso 1 1 d R . .
C22 C 0.13889(15) 0.63606(14) 0.26536(5) 0.0278(3) Uani 1 1 d . . .
D22 D 0.1691 0.6025 0.2975 0.033 Uiso 1 1 d R . .
C23 C 0.12688(15) 0.76617(14) 0.25890(5) 0.0292(3) Uani 1 1 d . . .
D23 D 0.1498 0.8203 0.2867 0.035 Uiso 1 1 d R . .
C24 C 0.08060(14) 0.81653(13) 0.21106(5) 0.0286(3) Uani 1 1 d . . .
D24 D 0.0728 0.9042 0.2068 0.034 Uiso 1 1 d R . .
C25 C -0.05910(13) 0.61787(13) -0.01191(5) 0.0250(2) Uani 1 1 d . . .
D25 D -0.0987 0.6968 -0.0199 0.03 Uiso 1 1 d R . .
C26 C 0.03803(14) 0.60513(13) 0.02999(5) 0.0265(2) Uani 1 1 d . . .
D26 D 0.0637 0.6756 0.0502 0.032 Uiso 1 1 d R . .
C27 C 0.09704(13) 0.48746(14) 0.04179(5) 0.0261(2) Uani 1 1 d . . .
D27 D 0.1624 0.4792 0.0699 0.031 Uiso 1 1 d R . .
O1 O 0.69722(8) 1.24738(8) 0.11550(3) 0.01877(15) Uani 1 1 d . . .
O2 O 0.83627(8) 0.97451(8) 0.10243(3) 0.01592(14) Uani 1 1 d . . .
O3 O 0.84739(9) 1.05150(9) 0.02246(3) 0.02099(16) Uani 1 1 d . . .
O4 O 1.01196(8) 0.91929(8) 0.05789(3) 0.01905(15) Uani 1 1 d . . .
H4A H 1.04663(8) 0.93621(8) 0.03075(3) 0.029 Uiso 1 1 d R . .
P1 P 0.51549(3) 0.87165(2) 0.115138(9) 0.01087(4) Uani 1 1 d . . .
Pd1 Pd 0.634113(7) 1.049763(7) 0.108806(3) 0.01065(2) Uani 1 1 d . . .
 
loop_
    _atom_site_aniso_label
    _atom_site_aniso_U_11
    _atom_site_aniso_U_22
    _atom_site_aniso_U_33
    _atom_site_aniso_U_23
    _atom_site_aniso_U_13
    _atom_site_aniso_U_12
C1 0.0132(4) 0.0119(4) 0.0122(4) 0.0007(3) 0.0015(3) 0.0011(3)
C2 0.0134(4) 0.0125(4) 0.0147(4) 0.0004(3) 0.0005(3) 0.0012(3)
C3 0.0125(4) 0.0176(5) 0.0200(4) -0.0004(4) 0.0011(3) 0.0016(3)
C4 0.0153(4) 0.0185(5) 0.0219(5) -0.0024(4) 0.0017(4) 0.0048(4)
C5 0.0192(5) 0.0131(4) 0.0192(4) -0.0020(3) 0.0006(4) 0.0031(4)
C6 0.0159(4) 0.0122(4) 0.0142(4) 0.0003(3) 0.0009(3) 0.0004(3)
C7 0.0192(5) 0.0112(4) 0.0247(5) -0.0003(4) 0.0040(4) -0.0001(3)
C8 0.0121(4) 0.0127(4) 0.0202(4) -0.0009(3) 0.0004(3) -0.0003(3)
C9 0.0160(4) 0.0139(4) 0.0133(4) 0.0019(3) 0.0024(3) 0.0000(3)
C10 0.0286(6) 0.0210(5) 0.0134(4) -0.0005(4) 0.0050(4) 0.0017(4)
C11 0.0246(5) 0.0168(5) 0.0227(5) 0.0059(4) 0.0050(4) -0.0028(4)
C12 0.0184(5) 0.0245(5) 0.0181(4) 0.0038(4) -0.0022(4) 0.0010(4)
C13 0.0174(4) 0.0122(4) 0.0150(4) -0.0016(3) 0.0017(3) -0.0004(3)
C14 0.0224(5) 0.0165(5) 0.0252(5) -0.0053(4) -0.0001(4) -0.0035(4)
C15 0.0198(5) 0.0153(5) 0.0240(5) -0.0030(4) 0.0051(4) 0.0028(4)
C16 0.0329(6) 0.0204(5) 0.0127(4) -0.0011(4) 0.0020(4) -0.0011(4)
C17 0.0205(5) 0.0188(5) 0.0294(6) 0.0003(4) 0.0081(4) -0.0062(4)
C18 0.0122(4) 0.0129(4) 0.0159(4) -0.0006(3) 0.0018(3) -0.0009(3)
C19 0.0180(5) 0.0396(7) 0.0228(5) 0.0118(5) 0.0026(4) 0.0027(5)
C20 0.0262(6) 0.0359(7) 0.0188(5) 0.0004(5) 0.0007(4) -0.0074(5)
C21 0.0322(6) 0.0239(6) 0.0247(5) 0.0046(5) 0.0046(5) -0.0011(5)
C22 0.0322(6) 0.0325(7) 0.0185(5) 0.0045(5) -0.0004(4) 0.0033(5)
C23 0.0324(7) 0.0300(7) 0.0256(6) -0.0048(5) 0.0049(5) -0.0005(5)
C24 0.0279(6) 0.0251(6) 0.0345(6) 0.0072(5) 0.0124(5) 0.0059(5)
C25 0.0219(5) 0.0255(6) 0.0287(6) 0.0046(5) 0.0091(4) 0.0023(4)
C26 0.0262(6) 0.0271(6) 0.0267(6) -0.0043(5) 0.0059(5) -0.0044(5)
C27 0.0209(5) 0.0348(7) 0.0226(5) 0.0030(5) 0.0012(4) -0.0017(5)
O1 0.0162(3) 0.0120(3) 0.0290(4) 0.0006(3) 0.0075(3) -0.0020(3)
O2 0.0136(3) 0.0191(4) 0.0155(3) 0.0021(3) 0.0044(3) 0.0019(3)
O3 0.0186(4) 0.0265(4) 0.0181(3) 0.0068(3) 0.0032(3) 0.0068(3)
O4 0.0152(3) 0.0230(4) 0.0195(3) 0.0036(3) 0.0052(3) 0.0066(3)
P1 0.01139(10) 0.00958(10) 0.01173(10) 0.00025(8) 0.00140(8) -0.00012(8)
Pd1 0.01105(3) 0.00986(3) 0.01121(3) 0.00072(2) 0.00199(2) -0.00042(2)
 
_geom_special_details
;
 All s.u.'s (except the s.u. in the dihedral angle between two l.s. planes)
 are estimated using the full covariance matrix.  The cell s.u.'s are taken
 into account individually in the estimation of s.u.'s in distances, angles
 and torsion angles; correlations between s.u.'s in cell parameters are only
 used when they are defined by crystal symmetry.  An approximate (isotropic)
 treatment of cell s.u.'s is used for estimating s.u.'s involving l.s. planes.
;

loop_
    _geom_bond_atom_site_label_1
    _geom_bond_atom_site_label_2
    _geom_bond_distance
    _geom_bond_site_symmetry_2
    _geom_bond_publ_flag
C1 C6 1.4018(14) . ?
C1 C2 1.4028(14) . ?
C1 Pd1 1.9617(10) . ?
C2 C3 1.3947(14) . ?
C2 C8 1.5054(14) . ?
C3 H3 0.93 . ?
C3 C4 1.3934(16) . ?
C4 H4 0.93 . ?
C4 C5 1.3904(16) . ?
C5 H5 0.93 . ?
C5 C6 1.3974(15) . ?
C6 C7 1.4973(15) . ?
C7 H7A 0.97 . ?
C7 H7B 0.97 . ?
C7 O1 1.4307(13) . ?
C8 H8A 0.97 . ?
C8 H8B 0.97 . ?
C8 P1 1.8385(10) . ?
C9 C11 1.5310(15) . ?
C9 C12 1.5356(15) . ?
C9 C10 1.5375(15) . ?
C9 P1 1.8706(10) . ?
C10 H10B 0.96 . ?
C10 H10C 0.96 . ?
C10 H10A 0.96 . ?
C11 H11A 0.96 . ?
C11 H11B 0.96 . ?
C11 H11C 0.96 . ?
C12 H12B 0.96 . ?
C12 H12C 0.96 . ?
C12 H12A 0.96 . ?
C13 C15 1.5321(15) . ?
C13 C14 1.5356(15) . ?
C13 C16 1.5380(15) . ?
C13 P1 1.8667(10) . ?
C14 H14A 0.96 . ?
C14 H14B 0.96 . ?
C14 H14C 0.96 . ?
C15 H15A 0.96 . ?
C15 H15B 0.96 . ?
C15 H15C 0.96 . ?
C16 H16B 0.96 . ?
C16 H16A 0.96 . ?
C16 H16C 0.96 . ?
C17 H17A 0.96 . ?
C17 H17B 0.96 . ?
C17 H17C 0.96 . ?
C17 O1 1.4320(13) . ?
C18 O2 1.2691(12) . ?
C18 O3 1.2727(13) . ?
C18 O4 1.3139(12) . ?
C19 C24 1.381(2) . ?
C19 C20 1.387(2) . ?
C19 D19 0.93 . ?
C20 C21 1.3863(18) . ?
C20 D20 0.93 . ?
C21 C22 1.3817(19) . ?
C21 D21 0.93 . ?
C22 C23 1.381(2) . ?
C22 D22 0.93 . ?
C23 C24 1.3898(19) . ?
C23 D23 0.93 . ?
C24 D24 0.93 . ?
C25 C26 1.3837(19) . ?
C25 C27 1.384(2) 3_565 ?
C25 D25 0.93 . ?
C26 C27 1.385(2) . ?
C26 D26 0.93 . ?
C27 C25 1.384(2) 3_565 ?
C27 D27 0.93 . ?
O1 Pd1 2.1665(8) . ?
O2 Pd1 2.1148(8) . ?
O4 H4A 0.82 . ?
P1 Pd1 2.2038(3) . ?
 
loop_
    _geom_angle_atom_site_label_1
    _geom_angle_atom_site_label_2
    _geom_angle_atom_site_label_3
    _geom_angle
    _geom_angle_site_symmetry_1
    _geom_angle_site_symmetry_3
    _geom_angle_publ_flag
C6 C1 C2 119.58(9) . . ?
C6 C1 Pd1 115.83(7) . . ?
C2 C1 Pd1 124.54(7) . . ?
C3 C2 C1 120.23(10) . . ?
C3 C2 C8 123.19(9) . . ?
C1 C2 C8 116.56(9) . . ?
H3 C3 C4 120.13 . . ?
H3 C3 C2 120.14 . . ?
C4 C3 C2 119.74(10) . . ?
H4 C4 C5 119.79 . . ?
H4 C4 C3 119.79 . . ?
C5 C4 C3 120.42(10) . . ?
H5 C5 C4 119.93 . . ?
H5 C5 C6 119.93 . . ?
C4 C5 C6 120.13(10) . . ?
C5 C6 C1 119.79(10) . . ?
C5 C6 C7 120.63(9) . . ?
C1 C6 C7 119.50(9) . . ?
H7A C7 H7B 108.2 . . ?
H7A C7 O1 109.77 . . ?
H7B C7 O1 109.76 . . ?
H7A C7 C6 109.77 . . ?
H7B C7 C6 109.76 . . ?
O1 C7 C6 109.54(9) . . ?
H8A C8 H8B 108.6 . . ?
H8A C8 C2 110.45 . . ?
H8B C8 C2 110.45 . . ?
H8A C8 P1 110.45 . . ?
H8B C8 P1 110.46 . . ?
C2 C8 P1 106.39(7) . . ?
C11 C9 C12 109.92(9) . . ?
C11 C9 C10 108.68(9) . . ?
C12 C9 C10 107.82(9) . . ?
C11 C9 P1 113.27(7) . . ?
C12 C9 P1 110.26(7) . . ?
C10 C9 P1 106.69(7) . . ?
H10B C10 H10C 109.5 . . ?
H10B C10 H10A 109.5 . . ?
H10C C10 H10A 109.5 . . ?
H10B C10 C9 109.47 . . ?
H10C C10 C9 109.47 . . ?
H10A C10 C9 109.47 . . ?
H11A C11 H11B 109.5 . . ?
H11A C11 H11C 109.5 . . ?
H11B C11 H11C 109.5 . . ?
H11A C11 C9 109.47 . . ?
H11B C11 C9 109.48 . . ?
H11C C11 C9 109.47 . . ?
H12B C12 H12C 109.5 . . ?
H12B C12 H12A 109.5 . . ?
H12C C12 H12A 109.5 . . ?
H12B C12 C9 109.47 . . ?
H12C C12 C9 109.48 . . ?
H12A C12 C9 109.46 . . ?
C15 C13 C14 110.19(9) . . ?
C15 C13 C16 108.74(9) . . ?
C14 C13 C16 108.14(9) . . ?
C15 C13 P1 111.02(7) . . ?
C14 C13 P1 112.14(7) . . ?
C16 C13 P1 106.44(7) . . ?
H14A C14 H14B 109.5 . . ?
H14A C14 H14C 109.5 . . ?
H14B C14 H14C 109.5 . . ?
H14A C14 C13 109.48 . . ?
H14B C14 C13 109.47 . . ?
H14C C14 C13 109.47 . . ?
H15A C15 H15B 109.5 . . ?
H15A C15 H15C 109.5 . . ?
H15B C15 H15C 109.5 . . ?
H15A C15 C13 109.48 . . ?
H15B C15 C13 109.47 . . ?
H15C C15 C13 109.47 . . ?
H16B C16 H16A 109.5 . . ?
H16B C16 H16C 109.5 . . ?
H16A C16 H16C 109.5 . . ?
H16B C16 C13 109.47 . . ?
H16A C16 C13 109.46 . . ?
H16C C16 C13 109.48 . . ?
H17A C17 H17B 109.5 . . ?
H17A C17 H17C 109.5 . . ?
H17B C17 H17C 109.5 . . ?
H17A C17 O1 109.47 . . ?
H17B C17 O1 109.47 . . ?
H17C C17 O1 109.47 . . ?
O2 C18 O3 123.07(10) . . ?
O2 C18 O4 116.22(9) . . ?
O3 C18 O4 120.71(9) . . ?
C24 C19 C20 119.80(12) . . ?
C24 C19 D19 120.1 . . ?
C20 C19 D19 120.1 . . ?
C21 C20 C19 120.06(13) . . ?
C21 C20 D20 120 . . ?
C19 C20 D20 120 . . ?
C22 C21 C20 120.14(13) . . ?
C22 C21 D21 119.9 . . ?
C20 C21 D21 119.9 . . ?
C23 C22 C21 119.82(12) . . ?
C23 C22 D22 120.1 . . ?
C21 C22 D22 120.1 . . ?
C22 C23 C24 120.22(13) . . ?
C22 C23 D23 119.9 . . ?
C24 C23 D23 119.9 . . ?
C19 C24 C23 119.96(13) . . ?
C19 C24 D24 120 . . ?
C23 C24 D24 120 . . ?
C26 C25 C27 119.69(12) . 3_565 ?
C26 C25 D25 120.2 . . ?
C27 C25 D25 120.2 3_565 . ?
C25 C26 C27 120.02(12) . . ?
C25 C26 D26 120 . . ?
C27 C26 D26 120 . . ?
C25 C27 C26 120.29(12) 3_565 . ?
C25 C27 D27 119.9 3_565 . ?
C26 C27 D27 119.9 . . ?
C7 O1 C17 113.44(9) . . ?
C7 O1 Pd1 113.74(6) . . ?
C17 O1 Pd1 127.95(7) . . ?
C18 O2 Pd1 120.80(7) . . ?
H4A O4 C18 109.47 . . ?
C8 P1 C13 106.07(5) . . ?
C8 P1 C9 106.08(5) . . ?
C13 P1 C9 113.02(5) . . ?
C8 P1 Pd1 104.53(3) . . ?
C13 P1 Pd1 115.70(3) . . ?
C9 P1 Pd1 110.51(3) . . ?
C1 Pd1 O2 174.83(4) . . ?
C1 Pd1 O1 80.69(4) . . ?
O2 Pd1 O1 96.40(3) . . ?
C1 Pd1 P1 82.49(3) . . ?
O2 Pd1 P1 99.86(2) . . ?
O1 Pd1 P1 162.03(2) . . ?


#===END


data_(9)
 
_audit_creation_method                  'WinGX routine CIF_UPDATE'
 
_chemical_name_systematic
;
'(9)'
;
_chemical_name_common                   '[(tBuPCO)Pd]2(?-CO3)'
_chemical_formula_moiety                'C35 H56 O5 P2 Pd2'
_chemical_formula_sum                   'C35 H56 O5 P2 Pd2'
_chemical_formula_weight                831.54

_symmetry_cell_setting                  monoclinic
_symmetry_space_group_name_H-M          'C 2/c'
_symmetry_space_group_name_Hall         '-C 2yc'
_symmetry_Int_Tables_number             15

loop_
    _symmetry_equiv_pos_as_xyz
'x, y, z'
'-x, y, -z+1/2'
'x+1/2, y+1/2, z'
'-x+1/2, y+1/2, -z+1/2'
'-x, -y, -z'
'x, -y, z-1/2'
'-x+1/2, -y+1/2, -z'
'x+1/2, -y+1/2, z-1/2'
 
_cell_length_a                          52.600(3)
_cell_length_b                          11.1482(6)
_cell_length_c                          12.4825(6)
_cell_angle_alpha                       90
_cell_angle_beta                        95.827(6)
_cell_angle_gamma                       90
_cell_volume                            7281.8(6)
_cell_formula_units_Z                   8
_cell_measurement_temperature           110(2)
_cell_measurement_reflns_used           345
_cell_measurement_theta_min             3
_cell_measurement_theta_max             20

_exptl_crystal_description              prism
_exptl_crystal_colour                   colorless
_exptl_crystal_size_max                 0.45
_exptl_crystal_size_mid                 0.2
_exptl_crystal_size_min                 0.04
_exptl_crystal_density_diffrn           1.517
_exptl_crystal_density_method           'not measured'
_exptl_crystal_F_000                    3424
_exptl_special_details
;
 0.5 degrees and 20 seconds per frame
;

_exptl_absorpt_coefficient_mu           1.114
_exptl_absorpt_correction_type          multi-scan
_exptl_absorpt_process_details          '(SADABS; Bruker, 2007)'
_exptl_absorpt_correction_T_min         0.6341
_exptl_absorpt_correction_T_max         0.9568

_diffrn_ambient_temperature             110(2)
_diffrn_radiation_wavelength            0.71073
_diffrn_radiation_type                  MoK\a
_diffrn_source                          'fine-focus sealed tube'
_diffrn_radiation_monochromator         graphite
_diffrn_measurement_device_type         'Bruker APEXII CCD area-detector'
_diffrn_measurement_method              '\f and \w scans'
_diffrn_reflns_av_R_equivalents         0.082
_diffrn_reflns_av_unetI/netI            0.0345
_diffrn_reflns_number                   126119
_diffrn_reflns_limit_h_min              -70
_diffrn_reflns_limit_h_max              70
_diffrn_reflns_limit_k_min              -14
_diffrn_reflns_limit_k_max              14
_diffrn_reflns_limit_l_min              -16
_diffrn_reflns_limit_l_max              16
_diffrn_reflns_theta_min                2.14
_diffrn_reflns_theta_max                28.28
_diffrn_reflns_theta_full               25
_diffrn_measured_fraction_theta_full
                                        0.986
_diffrn_measured_fraction_theta_max
                                        0.986
_reflns_number_total                    8938
_reflns_number_gt                       8080
_reflns_threshold_expression            >2\s(I)
 
_computing_data_collection              'APEX2 (Bruker, 2007)'
_computing_cell_refinement              'SAINT (Bruker, 2007)'
_computing_data_reduction               'SAINT (Bruker, 2007)'
_computing_structure_solution           'SHELXS97 (Sheldrick, 1997)'
_computing_structure_refinement         'SHELXL-97 (Sheldrick, 2008)'
_computing_molecular_graphics           'ORTEP-3 for Windows (Farrugia, 1997)'
_computing_publication_material         'SHELXL-97 (Sheldrick, 1997)'
  
_atom_sites_solution_primary            direct
_atom_sites_solution_secondary          difmap
_atom_sites_solution_hydrogens          geom

_refine_special_details
;
 Refinement of F^2^ against ALL reflections.  The weighted R-factor wR and
 goodness of fit S are based on F^2^, conventional R-factors R are based
 on F, with F set to zero for negative F^2^. The threshold expression of
 F^2^ > 2\s(F^2^) is used only for calculating R-factors(gt) etc. and is
 not relevant to the choice of reflections for refinement.  R-factors based
 on F^2^ are statistically about twice as large as those based on F, and R-
 factors based on ALL data will be even larger.
;
_refine_ls_structure_factor_coef        Fsqd
_refine_ls_matrix_type                  full
_refine_ls_weighting_scheme             calc
_refine_ls_weighting_details
       'calc w=1/[\s^2^(Fo^2^)+(0.0000P)^2^+218.2898P] where P=(Fo^2^+2Fc^2^)/3'
_refine_ls_hydrogen_treatment           constr
_refine_ls_extinction_method            none
_refine_ls_number_reflns                8938
_refine_ls_number_parameters            412
_refine_ls_number_restraints            0
_refine_ls_R_factor_all                 0.0758
_refine_ls_R_factor_gt                  0.0677
_refine_ls_wR_factor_ref                0.143
_refine_ls_wR_factor_gt                 0.1392
_refine_ls_goodness_of_fit_ref          1.237
_refine_ls_restrained_S_all             1.237
_refine_ls_shift/su_max                 0.002
_refine_ls_shift/su_mean                0
_refine_diff_density_max                1.441
_refine_diff_density_min                -3.352
_refine_diff_density_rms                0.175

loop_
    _atom_type_symbol
    _atom_type_description
    _atom_type_scat_dispersion_real
    _atom_type_scat_dispersion_imag
    _atom_type_scat_source
C C 0.0033 0.0016 'International Tables Vol C Tables 4.2.6.8 and 6.1.1.4'
H H 0 0 'International Tables Vol C Tables 4.2.6.8 and 6.1.1.4'
O O 0.0106 0.006 'International Tables Vol C Tables 4.2.6.8 and 6.1.1.4'
P P 0.1023 0.0942 'International Tables Vol C Tables 4.2.6.8 and 6.1.1.4'
Pd Pd -0.9988 1.0072 'International Tables Vol C Tables 4.2.6.8 and 6.1.1.4'
 
loop_
    _atom_site_label
    _atom_site_type_symbol
    _atom_site_fract_x
    _atom_site_fract_y
    _atom_site_fract_z
    _atom_site_U_iso_or_equiv
    _atom_site_adp_type
    _atom_site_occupancy
    _atom_site_symmetry_multiplicity
    _atom_site_calc_flag
    _atom_site_refinement_flags
    _atom_site_disorder_assembly
    _atom_site_disorder_group
C1 C 0.93818(13) 0.1874(6) 0.4716(6) 0.0158(13) Uani 1 1 d . . .
C2 C 0.96151(14) 0.1683(8) 0.5334(6) 0.0217(15) Uani 1 1 d . . .
C3 C 0.98379(15) 0.1391(8) 0.4873(7) 0.0281(18) Uani 1 1 d . . .
H3 H 0.9994 0.1272 0.5313 0.034 Uiso 1 1 calc R . .
C4 C 0.98277(16) 0.1276(9) 0.3764(6) 0.033(2) Uani 1 1 d . . .
H4 H 0.9978 0.1082 0.344 0.04 Uiso 1 1 calc R . .
C5 C 0.96001(14) 0.1444(7) 0.3129(6) 0.0213(15) Uani 1 1 d . . .
H5 H 0.9595 0.1358 0.237 0.026 Uiso 1 1 calc R . .
C6 C 0.93775(13) 0.1738(6) 0.3593(6) 0.0167(13) Uani 1 1 d . . .
C7 C 0.96261(13) 0.1854(8) 0.6539(6) 0.0208(15) Uani 1 1 d . . .
H7A H 0.9788 0.2249 0.6821 0.025 Uiso 1 1 calc R . .
H7B H 0.9613 0.1073 0.6908 0.025 Uiso 1 1 calc R . .
C8 C 0.91307(13) 0.1899(7) 0.2873(5) 0.0179(14) Uani 1 1 d . . .
H8A H 0.8997 0.1371 0.3124 0.021 Uiso 1 1 calc R . .
H8B H 0.9072 0.274 0.2916 0.021 Uiso 1 1 calc R . .
C9 C 0.92518(14) 0.2383(7) 0.8089(5) 0.0189(14) Uani 1 1 d . . .
C10 C 0.91150(15) 0.1174(7) 0.7912(6) 0.0232(16) Uani 1 1 d . . .
H10A H 0.923 0.0597 0.7617 0.035 Uiso 1 1 calc R . .
H10B H 0.8962 0.1277 0.7407 0.035 Uiso 1 1 calc R . .
H10C H 0.9066 0.0875 0.8601 0.035 Uiso 1 1 calc R . .
C11 C 0.94783(16) 0.2229(9) 0.8956(6) 0.0301(19) Uani 1 1 d . . .
H11A H 0.9414 0.2089 0.9656 0.045 Uiso 1 1 calc R . .
H11B H 0.9583 0.2956 0.8992 0.045 Uiso 1 1 calc R . .
H11C H 0.9582 0.1542 0.8773 0.045 Uiso 1 1 calc R . .
C12 C 0.90573(15) 0.3298(7) 0.8438(6) 0.0229(15) Uani 1 1 d . . .
H12A H 0.8917 0.3389 0.7863 0.034 Uiso 1 1 calc R . .
H12B H 0.9142 0.4073 0.8579 0.034 Uiso 1 1 calc R . .
H12C H 0.8989 0.3013 0.9094 0.034 Uiso 1 1 calc R . .
C13 C 0.94611(15) 0.4403(8) 0.6671(6) 0.0245(16) Uani 1 1 d . . .
C14 C 0.96191(18) 0.4524(9) 0.5703(7) 0.034(2) Uani 1 1 d . . .
H14A H 0.9525 0.4165 0.5065 0.05 Uiso 1 1 calc R . .
H14B H 0.9783 0.4109 0.5861 0.05 Uiso 1 1 calc R . .
H14C H 0.965 0.5374 0.5566 0.05 Uiso 1 1 calc R . .
C15 C 0.96259(18) 0.4814(9) 0.7696(7) 0.032(2) Uani 1 1 d . . .
H15A H 0.97 0.5603 0.7571 0.049 Uiso 1 1 calc R . .
H15B H 0.9764 0.4234 0.7875 0.049 Uiso 1 1 calc R . .
H15C H 0.9519 0.4867 0.8294 0.049 Uiso 1 1 calc R . .
C16 C 0.92237(18) 0.5207(8) 0.6451(8) 0.034(2) Uani 1 1 d . . .
H16A H 0.9278 0.6039 0.6361 0.05 Uiso 1 1 calc R . .
H16B H 0.912 0.5156 0.7059 0.05 Uiso 1 1 calc R . .
H16C H 0.9122 0.4936 0.5793 0.05 Uiso 1 1 calc R . .
C17 C 0.89293(16) 0.1504(9) 0.1144(6) 0.0296(19) Uani 1 1 d . . .
H17A H 0.8823 0.0909 0.1466 0.044 Uiso 1 1 calc R . .
H17B H 0.8959 0.1247 0.0417 0.044 Uiso 1 1 calc R . .
H17C H 0.8842 0.2281 0.1107 0.044 Uiso 1 1 calc R . .
C18 C 0.85877(12) 0.2236(6) 0.5052(5) 0.0124(12) Uani 1 1 d . . .
C19 C 0.80599(12) 0.1351(6) 0.1787(5) 0.0108(12) Uani 1 1 d . . .
C20 C 0.79409(12) 0.2154(6) 0.1037(5) 0.0116(12) Uani 1 1 d . . .
C21 C 0.78235(13) 0.1732(6) 0.0051(5) 0.0141(13) Uani 1 1 d . . .
H21 H 0.7736 0.2272 -0.0446 0.017 Uiso 1 1 calc R . .
C22 C 0.78358(13) 0.0512(6) -0.0196(6) 0.0165(13) Uani 1 1 d . . .
H22 H 0.7758 0.0222 -0.0865 0.02 Uiso 1 1 calc R . .
C23 C 0.79610(13) -0.0269(6) 0.0528(6) 0.0167(14) Uani 1 1 d . . .
H23 H 0.7972 -0.1093 0.0344 0.02 Uiso 1 1 calc R . .
C24 C 0.80724(13) 0.0131(6) 0.1534(5) 0.0133(13) Uani 1 1 d . . .
C25 C 0.79506(13) 0.3451(6) 0.1330(5) 0.0123(12) Uani 1 1 d . . .
H25A H 0.778 0.3819 0.1163 0.015 Uiso 1 1 calc R . .
H25B H 0.8073 0.3876 0.0911 0.015 Uiso 1 1 calc R . .
C26 C 0.82099(14) -0.0727(6) 0.2313(5) 0.0164(13) Uani 1 1 d . . .
H26A H 0.8088 -0.1317 0.2564 0.02 Uiso 1 1 calc R . .
H26B H 0.8342 -0.1168 0.1962 0.02 Uiso 1 1 calc R . .
C27 C 0.77512(12) 0.3932(6) 0.3389(5) 0.0101(12) Uani 1 1 d . . .
C28 C 0.77977(14) 0.3827(6) 0.4621(5) 0.0166(14) Uani 1 1 d . . .
H28A H 0.793 0.4398 0.4894 0.025 Uiso 1 1 calc R . .
H28B H 0.7853 0.301 0.4816 0.025 Uiso 1 1 calc R . .
H28C H 0.7639 0.4005 0.4938 0.025 Uiso 1 1 calc R . .
C29 C 0.76465(14) 0.5178(6) 0.3081(6) 0.0166(13) Uani 1 1 d . . .
H29A H 0.7475 0.5265 0.3316 0.025 Uiso 1 1 calc R . .
H29B H 0.7637 0.5277 0.2298 0.025 Uiso 1 1 calc R . .
H29C H 0.776 0.579 0.3432 0.025 Uiso 1 1 calc R . .
C30 C 0.75535(13) 0.2966(6) 0.2987(5) 0.0152(13) Uani 1 1 d . . .
H30A H 0.7399 0.3064 0.3356 0.023 Uiso 1 1 calc R . .
H30B H 0.7626 0.2168 0.3141 0.023 Uiso 1 1 calc R . .
H30C H 0.751 0.3055 0.2209 0.023 Uiso 1 1 calc R . .
C31 C 0.82977(13) 0.4785(6) 0.2891(5) 0.0145(13) Uani 1 1 d . . .
C32 C 0.85359(13) 0.4213(7) 0.2476(6) 0.0184(14) Uani 1 1 d . . .
H32A H 0.8488 0.3845 0.1771 0.028 Uiso 1 1 calc R . .
H32B H 0.8605 0.3598 0.2985 0.028 Uiso 1 1 calc R . .
H32C H 0.8665 0.4833 0.2407 0.028 Uiso 1 1 calc R . .
C33 C 0.83642(15) 0.5163(7) 0.4073(6) 0.0203(15) Uani 1 1 d . . .
H33A H 0.8514 0.569 0.4127 0.03 Uiso 1 1 calc R . .
H33B H 0.8402 0.4448 0.4517 0.03 Uiso 1 1 calc R . .
H33C H 0.8219 0.5592 0.4326 0.03 Uiso 1 1 calc R . .
C34 C 0.82237(14) 0.5909(6) 0.2215(5) 0.0159(13) Uani 1 1 d . . .
H34A H 0.807 0.627 0.2461 0.024 Uiso 1 1 calc R . .
H34B H 0.819 0.5684 0.1455 0.024 Uiso 1 1 calc R . .
H34C H 0.8364 0.649 0.2298 0.024 Uiso 1 1 calc R . .
C35 C 0.84594(15) -0.0762(7) 0.4033(6) 0.0223(15) Uani 1 1 d . . .
H35A H 0.8338 -0.1286 0.4353 0.033 Uiso 1 1 calc R . .
H35B H 0.8543 -0.0235 0.459 0.033 Uiso 1 1 calc R . .
H35C H 0.8588 -0.1251 0.3724 0.033 Uiso 1 1 calc R . .
O1 O 0.91660(10) 0.1614(5) 0.1782(4) 0.0213(11) Uani 1 1 d . . .
O2 O 0.86978(9) 0.2597(5) 0.5977(4) 0.0182(10) Uani 1 1 d . . .
O3 O 0.87339(9) 0.1878(5) 0.4350(4) 0.0166(10) Uani 1 1 d . . .
O4 O 0.83457(9) 0.2220(5) 0.4858(4) 0.0144(9) Uani 1 1 d . . .
O5 O 0.83254(10) -0.0049(4) 0.3203(4) 0.0195(11) Uani 1 1 d . . .
P1 P 0.93520(3) 0.28043(17) 0.67412(14) 0.0141(3) Uani 1 1 d . . .
P2 P 0.80520(3) 0.35752(14) 0.27720(12) 0.0083(3) Uani 1 1 d . . .
Pd1 Pd 0.906479(10) 0.23036(5) 0.54181(4) 0.01219(11) Uani 1 1 d . . .
Pd2 Pd 0.820979(9) 0.18041(4) 0.32375(4) 0.00920(10) Uani 1 1 d . . .
 
loop_
    _atom_site_aniso_label
    _atom_site_aniso_U_11
    _atom_site_aniso_U_22
    _atom_site_aniso_U_33
    _atom_site_aniso_U_23
    _atom_site_aniso_U_13
    _atom_site_aniso_U_12
C1 0.014(3) 0.015(3) 0.020(3) -0.006(3) 0.005(3) 0.001(3)
C2 0.014(3) 0.031(4) 0.020(3) -0.002(3) 0.001(3) 0.001(3)
C3 0.014(3) 0.042(5) 0.029(4) -0.005(4) 0.005(3) 0.005(3)
C4 0.022(4) 0.058(6) 0.022(4) -0.015(4) 0.007(3) 0.007(4)
C5 0.022(4) 0.023(4) 0.020(3) -0.004(3) 0.011(3) -0.004(3)
C6 0.017(3) 0.016(3) 0.018(3) -0.001(3) 0.008(3) -0.004(3)
C7 0.016(3) 0.029(4) 0.018(3) -0.006(3) 0.001(3) 0.008(3)
C8 0.019(3) 0.023(4) 0.012(3) -0.002(3) 0.006(3) 0.001(3)
C9 0.023(4) 0.025(4) 0.009(3) -0.004(3) 0.002(3) 0.002(3)
C10 0.027(4) 0.023(4) 0.020(3) 0.002(3) 0.005(3) 0.002(3)
C11 0.036(4) 0.043(5) 0.010(3) -0.008(3) -0.002(3) 0.007(4)
C12 0.025(4) 0.027(4) 0.018(3) -0.003(3) 0.009(3) 0.005(3)
C13 0.025(4) 0.028(4) 0.021(4) -0.003(3) 0.004(3) -0.006(3)
C14 0.041(5) 0.037(5) 0.024(4) 0.000(4) 0.009(4) -0.017(4)
C15 0.038(5) 0.036(5) 0.024(4) -0.013(4) 0.003(4) -0.015(4)
C16 0.039(5) 0.020(4) 0.043(5) -0.001(4) 0.005(4) 0.002(4)
C17 0.028(4) 0.050(6) 0.011(3) 0.002(3) 0.005(3) -0.004(4)
C18 0.015(3) 0.013(3) 0.009(3) 0.005(2) 0.002(2) 0.001(2)
C19 0.016(3) 0.005(3) 0.013(3) -0.001(2) 0.006(2) -0.004(2)
C20 0.014(3) 0.011(3) 0.011(3) -0.003(2) 0.006(2) -0.003(2)
C21 0.018(3) 0.013(3) 0.012(3) -0.003(2) 0.005(2) -0.001(3)
C22 0.016(3) 0.020(3) 0.014(3) -0.007(3) 0.004(3) -0.003(3)
C23 0.021(3) 0.011(3) 0.019(3) -0.010(3) 0.010(3) -0.001(3)
C24 0.014(3) 0.009(3) 0.018(3) -0.002(2) 0.007(2) -0.001(2)
C25 0.018(3) 0.009(3) 0.010(3) 0.000(2) 0.003(2) -0.001(2)
C26 0.022(3) 0.008(3) 0.019(3) -0.003(2) 0.004(3) 0.004(3)
C27 0.014(3) 0.007(3) 0.011(3) -0.002(2) 0.004(2) -0.002(2)
C28 0.022(3) 0.014(3) 0.014(3) -0.003(2) 0.006(3) 0.004(3)
C29 0.022(3) 0.014(3) 0.014(3) 0.004(3) 0.006(3) 0.003(3)
C30 0.015(3) 0.014(3) 0.017(3) -0.007(3) 0.002(3) -0.004(2)
C31 0.020(3) 0.012(3) 0.012(3) 0.000(2) 0.004(2) -0.004(3)
C32 0.018(3) 0.016(3) 0.023(3) -0.004(3) 0.008(3) -0.007(3)
C33 0.025(4) 0.017(3) 0.019(3) -0.002(3) 0.002(3) -0.011(3)
C34 0.024(3) 0.008(3) 0.016(3) 0.003(2) 0.003(3) -0.003(3)
C35 0.023(4) 0.018(4) 0.026(4) 0.008(3) 0.002(3) 0.004(3)
O1 0.024(3) 0.028(3) 0.013(2) -0.005(2) 0.005(2) 0.000(2)
O2 0.013(2) 0.028(3) 0.014(2) -0.003(2) 0.0010(18) 0.001(2)
O3 0.013(2) 0.026(3) 0.011(2) 0.000(2) 0.0016(17) 0.000(2)
O4 0.015(2) 0.020(2) 0.009(2) 0.0030(18) 0.0015(17) -0.0015(19)
O5 0.031(3) 0.009(2) 0.017(2) 0.0010(19) -0.007(2) 0.004(2)
P1 0.0122(8) 0.0188(9) 0.0112(7) -0.0018(6) 0.0010(6) 0.0008(7)
P2 0.0126(7) 0.0063(7) 0.0063(6) 0.0001(5) 0.0019(6) -0.0002(6)
Pd1 0.0115(2) 0.0157(2) 0.0092(2) -0.00139(18) 0.00051(17) 0.00134(19)
Pd2 0.0120(2) 0.0075(2) 0.0082(2) 0.00092(17) 0.00161(17) 0.00055(17)

_geom_special_details
;
 All s.u.'s (except the s.u. in the dihedral angle between two l.s. planes)
 are estimated using the full covariance matrix.  The cell s.u.'s are taken
 into account individually in the estimation of s.u.'s in distances, angles
 and torsion angles; correlations between s.u.'s in cell parameters are only
 used when they are defined by crystal symmetry.  An approximate (isotropic)
 treatment of cell s.u.'s is used for estimating s.u.'s involving l.s. planes.
;
loop_
    _geom_bond_atom_site_label_1
    _geom_bond_atom_site_label_2
    _geom_bond_distance
    _geom_bond_site_symmetry_2
    _geom_bond_publ_flag
C1 C2 1.398(10) . ?
C1 C6 1.408(9) . ?
C1 Pd1 2.018(7) . ?
C2 C3 1.395(10) . ?
C2 C7 1.511(10) . ?
C3 C4 1.386(11) . ?
C3 H3 0.95 . ?
C4 C5 1.379(11) . ?
C4 H4 0.95 . ?
C5 C6 1.397(9) . ?
C5 H5 0.95 . ?
C6 C8 1.513(10) . ?
C7 P1 1.827(7) . ?
C7 H7A 0.99 . ?
C7 H7B 0.99 . ?
C8 O1 1.428(8) . ?
C8 H8A 0.99 . ?
C8 H8B 0.99 . ?
C9 C10 1.533(11) . ?
C9 C11 1.536(10) . ?
C9 C12 1.538(10) . ?
C9 P1 1.873(7) . ?
C10 H10A 0.98 . ?
C10 H10B 0.98 . ?
C10 H10C 0.98 . ?
C11 H11A 0.98 . ?
C11 H11B 0.98 . ?
C11 H11C 0.98 . ?
C12 H12A 0.98 . ?
C12 H12B 0.98 . ?
C12 H12C 0.98 . ?
C13 C16 1.539(12) . ?
C13 C15 1.540(11) . ?
C13 C14 1.541(11) . ?
C13 P1 1.877(8) . ?
C14 H14A 0.98 . ?
C14 H14B 0.98 . ?
C14 H14C 0.98 . ?
C15 H15A 0.98 . ?
C15 H15B 0.98 . ?
C15 H15C 0.98 . ?
C16 H16A 0.98 . ?
C16 H16B 0.98 . ?
C16 H16C 0.98 . ?
C17 O1 1.414(9) . ?
C17 H17A 0.98 . ?
C17 H17B 0.98 . ?
C17 H17C 0.98 . ?
C18 O4 1.272(8) . ?
C18 O3 1.286(8) . ?
C18 O2 1.301(8) . ?
C18 Pd1 2.506(7) . ?
C19 C20 1.398(9) . ?
C19 C24 1.399(9) . ?
C19 Pd2 1.966(6) . ?
C20 C21 1.400(9) . ?
C20 C25 1.492(9) . ?
C21 C22 1.398(9) . ?
C21 H21 0.95 . ?
C22 C23 1.373(10) . ?
C22 H22 0.95 . ?
C23 C24 1.404(9) . ?
C23 H23 0.95 . ?
C24 C26 1.498(9) . ?
C25 P2 1.830(7) . ?
C25 H25A 0.99 . ?
C25 H25B 0.99 . ?
C26 O5 1.427(8) . ?
C26 H26A 0.99 . ?
C26 H26B 0.99 . ?
C27 C29 1.528(9) . ?
C27 C28 1.537(9) . ?
C27 C30 1.545(9) . ?
C27 P2 1.871(6) . ?
C28 H28A 0.98 . ?
C28 H28B 0.98 . ?
C28 H28C 0.98 . ?
C29 H29A 0.98 . ?
C29 H29B 0.98 . ?
C29 H29C 0.98 . ?
C30 H30A 0.98 . ?
C30 H30B 0.98 . ?
C30 H30C 0.98 . ?
C31 C34 1.539(9) . ?
C31 C33 1.539(9) . ?
C31 C32 1.542(9) . ?
C31 P2 1.864(7) . ?
C32 H32A 0.98 . ?
C32 H32B 0.98 . ?
C32 H32C 0.98 . ?
C33 H33A 0.98 . ?
C33 H33B 0.98 . ?
C33 H33C 0.98 . ?
C34 H34A 0.98 . ?
C34 H34B 0.98 . ?
C34 H34C 0.98 . ?
C35 O5 1.433(8) . ?
C35 H35A 0.98 . ?
C35 H35B 0.98 . ?
C35 H35C 0.98 . ?
O2 Pd1 2.143(5) . ?
O3 Pd1 2.135(5) . ?
O4 Pd2 2.127(5) . ?
O5 Pd2 2.155(5) . ?
P1 Pd1 2.1943(18) . ?
P2 Pd2 2.1970(17) . ?
 
loop_
    _geom_angle_atom_site_label_1
    _geom_angle_atom_site_label_2
    _geom_angle_atom_site_label_3
    _geom_angle
    _geom_angle_site_symmetry_1
    _geom_angle_site_symmetry_3
    _geom_angle_publ_flag
C2 C1 C6 117.2(6) . . ?
C2 C1 Pd1 120.9(5) . . ?
C6 C1 Pd1 121.9(5) . . ?
C3 C2 C1 122.3(7) . . ?
C3 C2 C7 119.4(7) . . ?
C1 C2 C7 118.2(6) . . ?
C4 C3 C2 119.0(7) . . ?
C4 C3 H3 120.5 . . ?
C2 C3 H3 120.5 . . ?
C5 C4 C3 120.3(7) . . ?
C5 C4 H4 119.8 . . ?
C3 C4 H4 119.8 . . ?
C4 C5 C6 120.6(7) . . ?
C4 C5 H5 119.7 . . ?
C6 C5 H5 119.7 . . ?
C5 C6 C1 120.6(7) . . ?
C5 C6 C8 119.1(6) . . ?
C1 C6 C8 120.3(6) . . ?
C2 C7 P1 105.0(5) . . ?
C2 C7 H7A 110.7 . . ?
P1 C7 H7A 110.7 . . ?
C2 C7 H7B 110.7 . . ?
P1 C7 H7B 110.7 . . ?
H7A C7 H7B 108.8 . . ?
O1 C8 C6 110.7(5) . . ?
O1 C8 H8A 109.5 . . ?
C6 C8 H8A 109.5 . . ?
O1 C8 H8B 109.5 . . ?
C6 C8 H8B 109.5 . . ?
H8A C8 H8B 108.1 . . ?
C10 C9 C11 108.8(7) . . ?
C10 C9 C12 107.9(6) . . ?
C11 C9 C12 111.4(6) . . ?
C10 C9 P1 105.2(5) . . ?
C11 C9 P1 113.1(5) . . ?
C12 C9 P1 110.1(5) . . ?
C9 C10 H10A 109.5 . . ?
C9 C10 H10B 109.5 . . ?
H10A C10 H10B 109.5 . . ?
C9 C10 H10C 109.5 . . ?
H10A C10 H10C 109.5 . . ?
H10B C10 H10C 109.5 . . ?
C9 C11 H11A 109.5 . . ?
C9 C11 H11B 109.5 . . ?
H11A C11 H11B 109.5 . . ?
C9 C11 H11C 109.5 . . ?
H11A C11 H11C 109.5 . . ?
H11B C11 H11C 109.5 . . ?
C9 C12 H12A 109.5 . . ?
C9 C12 H12B 109.5 . . ?
H12A C12 H12B 109.5 . . ?
C9 C12 H12C 109.5 . . ?
H12A C12 H12C 109.5 . . ?
H12B C12 H12C 109.5 . . ?
C16 C13 C15 110.7(7) . . ?
C16 C13 C14 107.5(7) . . ?
C15 C13 C14 108.8(7) . . ?
C16 C13 P1 108.3(6) . . ?
C15 C13 P1 113.1(6) . . ?
C14 C13 P1 108.1(6) . . ?
C13 C14 H14A 109.5 . . ?
C13 C14 H14B 109.5 . . ?
H14A C14 H14B 109.5 . . ?
C13 C14 H14C 109.5 . . ?
H14A C14 H14C 109.5 . . ?
H14B C14 H14C 109.5 . . ?
C13 C15 H15A 109.5 . . ?
C13 C15 H15B 109.5 . . ?
H15A C15 H15B 109.5 . . ?
C13 C15 H15C 109.5 . . ?
H15A C15 H15C 109.5 . . ?
H15B C15 H15C 109.5 . . ?
C13 C16 H16A 109.5 . . ?
C13 C16 H16B 109.5 . . ?
H16A C16 H16B 109.5 . . ?
C13 C16 H16C 109.5 . . ?
H16A C16 H16C 109.5 . . ?
H16B C16 H16C 109.5 . . ?
O1 C17 H17A 109.5 . . ?
O1 C17 H17B 109.5 . . ?
H17A C17 H17B 109.5 . . ?
O1 C17 H17C 109.5 . . ?
H17A C17 H17C 109.5 . . ?
H17B C17 H17C 109.5 . . ?
O4 C18 O3 121.5(6) . . ?
O4 C18 O2 121.3(6) . . ?
O3 C18 O2 117.2(6) . . ?
O4 C18 Pd1 178.9(5) . . ?
O3 C18 Pd1 58.4(3) . . ?
O2 C18 Pd1 58.8(3) . . ?
C20 C19 C24 119.9(6) . . ?
C20 C19 Pd2 124.3(5) . . ?
C24 C19 Pd2 115.8(5) . . ?
C19 C20 C21 120.1(6) . . ?
C19 C20 C25 117.1(6) . . ?
C21 C20 C25 122.8(6) . . ?
C22 C21 C20 119.6(6) . . ?
C22 C21 H21 120.2 . . ?
C20 C21 H21 120.2 . . ?
C23 C22 C21 120.1(6) . . ?
C23 C22 H22 120 . . ?
C21 C22 H22 120 . . ?
C22 C23 C24 121.0(6) . . ?
C22 C23 H23 119.5 . . ?
C24 C23 H23 119.5 . . ?
C19 C24 C23 119.1(6) . . ?
C19 C24 C26 120.3(6) . . ?
C23 C24 C26 120.6(6) . . ?
C20 C25 P2 108.3(4) . . ?
C20 C25 H25A 110 . . ?
P2 C25 H25A 110 . . ?
C20 C25 H25B 110 . . ?
P2 C25 H25B 110 . . ?
H25A C25 H25B 108.4 . . ?
O5 C26 C24 107.8(5) . . ?
O5 C26 H26A 110.1 . . ?
C24 C26 H26A 110.1 . . ?
O5 C26 H26B 110.1 . . ?
C24 C26 H26B 110.1 . . ?
H26A C26 H26B 108.5 . . ?
C29 C27 C28 109.7(5) . . ?
C29 C27 C30 109.8(5) . . ?
C28 C27 C30 107.7(5) . . ?
C29 C27 P2 112.8(4) . . ?
C28 C27 P2 109.9(4) . . ?
C30 C27 P2 106.7(4) . . ?
C27 C28 H28A 109.5 . . ?
C27 C28 H28B 109.5 . . ?
H28A C28 H28B 109.5 . . ?
C27 C28 H28C 109.5 . . ?
H28A C28 H28C 109.5 . . ?
H28B C28 H28C 109.5 . . ?
C27 C29 H29A 109.5 . . ?
C27 C29 H29B 109.5 . . ?
H29A C29 H29B 109.5 . . ?
C27 C29 H29C 109.5 . . ?
H29A C29 H29C 109.5 . . ?
H29B C29 H29C 109.5 . . ?
C27 C30 H30A 109.5 . . ?
C27 C30 H30B 109.5 . . ?
H30A C30 H30B 109.5 . . ?
C27 C30 H30C 109.5 . . ?
H30A C30 H30C 109.5 . . ?
H30B C30 H30C 109.5 . . ?
C34 C31 C33 108.9(6) . . ?
C34 C31 C32 108.7(6) . . ?
C33 C31 C32 108.8(6) . . ?
C34 C31 P2 114.2(5) . . ?
C33 C31 P2 111.3(4) . . ?
C32 C31 P2 104.7(4) . . ?
C31 C32 H32A 109.5 . . ?
C31 C32 H32B 109.5 . . ?
H32A C32 H32B 109.5 . . ?
C31 C32 H32C 109.5 . . ?
H32A C32 H32C 109.5 . . ?
H32B C32 H32C 109.5 . . ?
C31 C33 H33A 109.5 . . ?
C31 C33 H33B 109.5 . . ?
H33A C33 H33B 109.5 . . ?
C31 C33 H33C 109.5 . . ?
H33A C33 H33C 109.5 . . ?
H33B C33 H33C 109.5 . . ?
C31 C34 H34A 109.5 . . ?
C31 C34 H34B 109.5 . . ?
H34A C34 H34B 109.5 . . ?
C31 C34 H34C 109.5 . . ?
H34A C34 H34C 109.5 . . ?
H34B C34 H34C 109.5 . . ?
O5 C35 H35A 109.5 . . ?
O5 C35 H35B 109.5 . . ?
H35A C35 H35B 109.5 . . ?
O5 C35 H35C 109.5 . . ?
H35A C35 H35C 109.5 . . ?
H35B C35 H35C 109.5 . . ?
C17 O1 C8 111.4(5) . . ?
C18 O2 Pd1 89.9(4) . . ?
C18 O3 Pd1 90.7(4) . . ?
C18 O4 Pd2 114.7(4) . . ?
C26 O5 C35 114.1(5) . . ?
C26 O5 Pd2 115.1(4) . . ?
C35 O5 Pd2 129.5(4) . . ?
C7 P1 C9 106.0(3) . . ?
C7 P1 C13 107.2(4) . . ?
C9 P1 C13 113.3(3) . . ?
C7 P1 Pd1 104.0(2) . . ?
C9 P1 Pd1 112.2(2) . . ?
C13 P1 Pd1 113.4(3) . . ?
C25 P2 C31 105.3(3) . . ?
C25 P2 C27 104.3(3) . . ?
C31 P2 C27 114.9(3) . . ?
C25 P2 Pd2 104.9(2) . . ?
C31 P2 Pd2 112.9(2) . . ?
C27 P2 Pd2 113.3(2) . . ?
C1 Pd1 O3 109.5(2) . . ?
C1 Pd1 O2 171.3(2) . . ?
O3 Pd1 O2 62.16(18) . . ?
C1 Pd1 P1 81.4(2) . . ?
O3 Pd1 P1 168.99(14) . . ?
O2 Pd1 P1 106.89(14) . . ?
C1 Pd1 C18 140.3(2) . . ?
O3 Pd1 C18 30.88(19) . . ?
O2 Pd1 C18 31.29(19) . . ?
P1 Pd1 C18 138.17(15) . . ?
C19 Pd2 O4 175.2(2) . . ?
C19 Pd2 O5 79.8(2) . . ?
O4 Pd2 O5 99.19(19) . . ?
C19 Pd2 P2 83.23(19) . . ?
O4 Pd2 P2 97.88(14) . . ?
O5 Pd2 P2 162.93(14) . . ?
 

#===END
